# Supplementary material for: Inflating Source Imaging and Stress/Strain Field Analysis at Campi Flegrei Caldera: The 2009–2013 Unrest Episode
Source: MDPI journal article supplement (doi:10.3390/rs13122298), 2021-06-11
Supplement: s1 [file s1]

| Rx/2 | Ry/2 | Rz/2 | Cx     | Cy      | Cz | Dip   | Strike | DP    | RMSE_A | RMSE_D | RMSE_NS | RMSE_EW | RMSE_UP |         |
|------|------|------|--------|---------|----|-------|--------|-------|--------|--------|---------|---------|---------|---------|
| 1884 | 1811 | 506  | 426145 | 4519708 |    | -2048 | 17,9   | 7,3   | 17     | 0,0552 | 0,0782  | 0,0865  | 0,13192 | 0,4194  |
| 1807 | 1796 | 547  | 426311 | 4519802 |    | -2252 | 6,3    | 17,7  | 21     | 0,0534 | 0,0737  | 0,0648  | 0,08988 | 0,3458  |
| 1452 | 1743 | 547  | 426473 | 4519530 |    | -2096 | -17,4  | 17,9  | 36     | 0,0469 | 0,0634  | 0,0538  | 0,07059 | 0,31011 |
| 1606 | 1666 | 532  | 426095 | 4519669 |    | -2228 | 19,1   | -4,1  | 32     | 0,0415 | 0,0579  | 0,0547  | 0,07321 | 0,22709 |
| 1355 | 1892 | 518  | 425986 | 4519548 |    | -2191 | -17,2  | -2,1  | 20     | 0,04   | 0,0535  | 0,0491  | 0,06565 | 0,21456 |
| 1545 | 1803 | 455  | 426092 | 4519811 |    | -2191 | -16,4  | -14,4 | 23     | 0,0403 | 0,0532  | 0,041   | 0,05356 | 0,19602 |
| 1734 | 1892 | 469  | 425541 | 4519809 |    | -2368 | 7      | 13,9  | 18     | 0,0411 | 0,053   | 0,0484  | 0,0592  | 0,17706 |
| 1916 | 1808 | 523  | 426133 | 4519757 |    | -2691 | -10,1  | 4     | 23     | 0,0398 | 0,0548  | 0,0385  | 0,03869 | 0,15861 |
| 1769 | 1525 | 524  | 425758 | 4519412 |    | -2289 | -9,9   | 0,7   | 36     | 0,0367 | 0,0501  | 0,0585  | 0,05877 | 0,19226 |
| 1825 | 1946 | 446  | 425773 | 4519061 |    | -2277 | -8,7   | 4,5   | 27     | 0,0365 | 0,0497  | 0,0739  | 0,0642  | 0,19484 |
| 1605 | 1940 | 411  | 425665 | 4519528 |    | -2150 | -14,9  | -18,8 | 26     | 0,0367 | 0,049   | 0,0512  | 0,06104 | 0,17932 |
| 1788 | 1421 | 506  | 426089 | 4520000 |    | -2315 | 1,5    | -5,7  | 17     | 0,0379 | 0,0506  | 0,0373  | 0,04184 | 0,15337 |
| 1972 | 1662 | 411  | 425656 | 4519906 |    | -2412 | -16,3  | 18,3  | 13     | 0,0371 | 0,0476  | 0,0357  | 0,039   | 0,13681 |
| 1890 | 1883 | 443  | 425795 | 4519472 |    | -2498 | -3,8   | 12    | 39     | 0,035  | 0,0468  | 0,0455  | 0,04286 | 0,14164 |
| 1462 | 1999 | 479  | 426028 | 4519389 |    | -2361 | 13,5   | 6,2   | 40     | 0,0333 | 0,0462  | 0,0466  | 0,04912 | 0,14578 |
| 1174 | 1898 | 547  | 426261 | 4519955 |    | -2351 | -11,2  | 12,9  | 25     | 0,0359 | 0,0468  | 0,0283  | 0,03685 | 0,12948 |
| 1949 | 1382 | 510  | 426252 | 4519146 |    | -2264 | 19,8   | 9,4   | 12     | 0,0298 | 0,0461  | 0,0651  | 0,04889 | 0,16104 |
| 1673 | 1623 | 444  | 425524 | 4519712 |    | -2245 | -6,7   | -10,5 | 32     | 0,0338 | 0,0444  | 0,0418  | 0,04702 | 0,13739 |
| 1336 | 1791 | 510  | 425845 | 4519589 |    | -2309 | -12,3  | 0,1   | 13     | 0,033  | 0,0441  | 0,0386  | 0,04514 | 0,13719 |
| 1972 | 1760 | 496  | 425541 | 4519964 |    | -2865 | -8,1   | -2,3  | 14     | 0,0362 | 0,0464  | 0,0305  | 0,02842 | 0,10671 |

|      |      |     |                |       |       |       |    |        |        |        |         |         |
|------|------|-----|----------------|-------|-------|-------|----|--------|--------|--------|---------|---------|
| 1473 | 1677 | 400 | 425803 4519974 | -2043 | 18,2  | -5,6  | 37 | 0,0329 | 0,0441 | 0,0341 | 0,04712 | 0,12244 |
| 1966 | 1748 | 501 | 425860 4519076 | -2636 | 13,1  | -13,4 | 36 | 0,0309 | 0,0423 | 0,0567 | 0,04128 | 0,11834 |
| 1757 | 1192 | 514 | 425736 4519771 | -2209 | 14,7  | -2,5  | 17 | 0,0301 | 0,0414 | 0,0396 | 0,04111 | 0,11704 |
| 1534 | 1436 | 541 | 425663 4519119 | -2178 | -6,5  | -1,2  | 37 | 0,0285 | 0,0399 | 0,0602 | 0,05079 | 0,13336 |
| 1905 | 1911 | 291 | 426275 4519824 | -2125 | 3     | 8,3   | 39 | 0,0308 | 0,0421 | 0,0285 | 0,02954 | 0,1115  |
| 1732 | 1480 | 458 | 426109 4519749 | -2391 | -18,2 | -4,4  | 36 | 0,0308 | 0,0415 | 0,0298 | 0,0284  | 0,11411 |
| 1279 | 1544 | 445 | 426147 4519827 | -2036 | 5,2   | -12,5 | 16 | 0,03   | 0,0402 | 0,0293 | 0,03574 | 0,11375 |
| 1409 | 1383 | 516 | 426267 4519611 | -2196 | 12,1  | -12,3 | 39 | 0,0289 | 0,0405 | 0,0323 | 0,03381 | 0,11957 |
| 1924 | 1909 | 494 | 426315 4519776 | -3058 | -14,4 | -19,7 | 29 | 0,0314 | 0,0451 | 0,0245 | 0,0185  | 0,08567 |
| 1934 | 1475 | 490 | 425957 4519079 | -2412 | -7,1  | -11,3 | 11 | 0,028  | 0,0397 | 0,0538 | 0,03544 | 0,12088 |
| 1618 | 1602 | 436 | 426429 4519617 | -2314 | 7,5   | -5,9  | 34 | 0,0289 | 0,041  | 0,03   | 0,02766 | 0,10955 |
| 1816 | 1686 | 476 | 426176 4519312 | -2559 | 6,2   | 1,1   | 27 | 0,0285 | 0,041  | 0,0401 | 0,02998 | 0,10661 |
| 1488 | 1644 | 521 | 426470 4519527 | -2482 | 4     | -4,9  | 32 | 0,0287 | 0,0413 | 0,0302 | 0,02592 | 0,10536 |
| 1889 | 1739 | 522 | 426308 4519811 | -3016 | -10,3 | 7,6   | 40 | 0,0307 | 0,0437 | 0,0238 | 0,01766 | 0,08045 |
| 1644 | 1970 | 354 | 426386 4519246 | -2200 | -1,4  | -14,1 | 37 | 0,0274 | 0,0394 | 0,0367 | 0,02887 | 0,11328 |
| 1642 | 1699 | 381 | 425928 4519640 | -2242 | -6,3  | -17   | 32 | 0,0284 | 0,0383 | 0,0315 | 0,03104 | 0,10312 |
| 1734 | 1933 | 398 | 426211 4519678 | -2599 | 17,6  | -0,1  | 15 | 0,0284 | 0,0394 | 0,0277 | 0,02524 | 0,08547 |
| 1860 | 1419 | 544 | 425658 4519352 | -2595 | 6,5   | 10    | 18 | 0,0279 | 0,0373 | 0,0429 | 0,03229 | 0,09236 |
| 1886 | 1516 | 494 | 426017 4519319 | -2611 | 17,1  | -3,2  | 15 | 0,0267 | 0,0379 | 0,0402 | 0,0298  | 0,09236 |
| 1698 | 1395 | 468 | 425549 4519008 | -2133 | -9,6  | 7,8   | 17 | 0,0253 | 0,0353 | 0,058  | 0,04326 | 0,10751 |
| 1377 | 1613 | 441 | 426458 4519707 | -2243 | -11,1 | -6,1  | 23 | 0,0275 | 0,0374 | 0,024  | 0,02297 | 0,09435 |

|      |      |     |                |       |       |       |    |        |        |        |         |         |
|------|------|-----|----------------|-------|-------|-------|----|--------|--------|--------|---------|---------|
| 1661 | 1776 | 442 | 426398 4519566 | -2605 | 17    | 8,6   | 31 | 0,0266 | 0,0384 | 0,0277 | 0,02259 | 0,08439 |
| 1860 | 1335 | 374 | 426381 4519210 | -2002 | 14,5  | -4,4  | 12 | 0,0235 | 0,036  | 0,0399 | 0,02867 | 0,10806 |
| 1601 | 1508 | 468 | 426173 4519816 | -2480 | 13,9  | -6,4  | 18 | 0,0273 | 0,0373 | 0,0259 | 0,02389 | 0,08085 |
| 1771 | 1315 | 501 | 425956 4519889 | -2580 | -17,4 | -1,1  | 14 | 0,0274 | 0,0365 | 0,0244 | 0,02005 | 0,07665 |
| 1833 | 987  | 459 | 425915 4519529 | -2006 | 13,3  | -16,2 | 10 | 0,0231 | 0,034  | 0,0344 | 0,03093 | 0,09028 |
| 1426 | 1910 | 477 | 425875 4519877 | -2726 | -16   | -18,1 | 18 | 0,0276 | 0,0362 | 0,0228 | 0,0204  | 0,06768 |
| 1949 | 1770 | 492 | 425910 4519676 | -3154 | -14,4 | 10    | 26 | 0,0271 | 0,0374 | 0,0225 | 0,01515 | 0,06274 |
| 1623 | 1734 | 311 | 426142 4519627 | -2094 | -4,3  | -6    | 36 | 0,0251 | 0,0342 | 0,0255 | 0,02386 | 0,08527 |
| 1948 | 1577 | 518 | 425735 4519898 | -3086 | 4,7   | 8,2   | 13 | 0,0278 | 0,0368 | 0,0223 | 0,01541 | 0,06087 |
| 1054 | 1788 | 506 | 426347 4519446 | -2244 | -10,2 | -12,7 | 31 | 0,0247 | 0,0341 | 0,0261 | 0,02398 | 0,0874  |
| 1432 | 1174 | 525 | 426230 4519988 | -2293 | 19,4  | -2,8  | 32 | 0,0258 | 0,0346 | 0,0237 | 0,02235 | 0,07222 |
| 1887 | 1829 | 427 | 426455 4519858 | -2960 | 13,2  | 2,2   | 20 | 0,0265 | 0,0376 | 0,02   | 0,0136  | 0,05852 |
| 1949 | 1906 | 379 | 426405 4519803 | -2821 | -13,7 | 3,2   | 18 | 0,0265 | 0,0376 | 0,0195 | 0,01306 | 0,05979 |
| 1845 | 1180 | 415 | 426272 4519904 | -2249 | 17    | 10,3  | 13 | 0,0246 | 0,0346 | 0,0254 | 0,02167 | 0,07436 |
| 1799 | 1876 | 492 | 425924 4519181 | -2950 | -4,8  | 10,1  | 36 | 0,0251 | 0,0346 | 0,032  | 0,01972 | 0,06601 |
| 1817 | 1449 | 384 | 425559 4519391 | -2179 | 12,3  | 16,6  | 32 | 0,0231 | 0,0322 | 0,0399 | 0,03209 | 0,07512 |
| 1389 | 1525 | 401 | 426107 4519618 | -2153 | 11,5  | 7,4   | 28 | 0,0234 | 0,0326 | 0,0259 | 0,02475 | 0,07672 |
| 1458 | 1910 | 495 | 425750 4519791 | -2862 | -8    | -18,1 | 29 | 0,0263 | 0,0343 | 0,0223 | 0,0179  | 0,05845 |
| 1877 | 1757 | 415 | 425568 4519255 | -2597 | 9     | 13,4  | 15 | 0,0249 | 0,0321 | 0,0376 | 0,02593 | 0,0672  |
| 1711 | 1927 | 548 | 426484 4519204 | -3216 | 4,6   | 16,3  | 36 | 0,0237 | 0,0361 | 0,0257 | 0,01323 | 0,0577  |
| 1413 | 1595 | 540 | 425855 4519912 | -2724 | 8     | 7,6   | 28 | 0,0259 | 0,0339 | 0,0219 | 0,01846 | 0,05945 |

|      |      |     |                |       |       |       |    |        |        |        |         |         |
|------|------|-----|----------------|-------|-------|-------|----|--------|--------|--------|---------|---------|
| 1927 | 1759 | 383 | 426126 4519380 | -2605 | -8    | -5,1  | 32 | 0,0239 | 0,0339 | 0,028  | 0,01776 | 0,0688  |
| 1988 | 914  | 548 | 426053 4519912 | -2432 | -7,9  | -15,8 | 29 | 0,0246 | 0,0333 | 0,0226 | 0,01622 | 0,06805 |
| 1573 | 1701 | 290 | 426480 4519769 | -2039 | -12   | 5,9   | 26 | 0,0247 | 0,0324 | 0,0196 | 0,01703 | 0,07351 |
| 1723 | 1269 | 470 | 425779 4519648 | -2405 | 8,3   | -7,7  | 16 | 0,0237 | 0,0322 | 0,0283 | 0,02285 | 0,06853 |
| 1963 | 1720 | 353 | 425869 4519596 | -2554 | -10,5 | 2,5   | 38 | 0,0244 | 0,033  | 0,025  | 0,01802 | 0,06533 |
| 1611 | 954  | 519 | 426288 4519855 | -2175 | 2,7   | 0,4   | 18 | 0,0235 | 0,0322 | 0,0233 | 0,01823 | 0,07082 |
| 1552 | 1261 | 497 | 426206 4519159 | -2247 | 14,2  | 0,1   | 34 | 0,0211 | 0,0318 | 0,0365 | 0,02466 | 0,0816  |
| 1384 | 1754 | 454 | 425859 4519079 | -2341 | 8,1   | -19,6 | 14 | 0,0223 | 0,0313 | 0,0387 | 0,02856 | 0,07379 |
| 1116 | 1751 | 397 | 426237 4519583 | -2065 | 16,1  | 5,6   | 14 | 0,0229 | 0,0313 | 0,0225 | 0,02369 | 0,07403 |
| 1887 | 1850 | 350 | 425727 4519149 | -2410 | 4,2   | 9,8   | 26 | 0,0232 | 0,0314 | 0,0381 | 0,02588 | 0,06916 |
| 1816 | 1959 | 484 | 425837 4519628 | -3279 | 14,4  | 16,6  | 40 | 0,0251 | 0,0337 | 0,0214 | 0,01364 | 0,05099 |
| 1475 | 1759 | 483 | 426029 4519481 | -2688 | 0,7   | 3,3   | 22 | 0,0233 | 0,032  | 0,0249 | 0,01818 | 0,05927 |
| 1955 | 1933 | 299 | 426458 4519113 | -2349 | 6,1   | 6,1   | 11 | 0,0212 | 0,0321 | 0,0313 | 0,01743 | 0,06806 |
| 843  | 1583 | 543 | 425876 4519797 | -2102 | 19,2  | 1,9   | 12 | 0,0223 | 0,03   | 0,0217 | 0,02468 | 0,06075 |
| 1996 | 1499 | 464 | 425600 4519472 | -2845 | 16,1  | -18,2 | 24 | 0,024  | 0,0309 | 0,0279 | 0,01816 | 0,05519 |
| 1803 | 1976 | 300 | 425898 4519114 | -2276 | -0,8  | -4    | 40 | 0,0216 | 0,0301 | 0,0342 | 0,02311 | 0,06682 |
| 1817 | 1557 | 419 | 426335 4519594 | -2655 | -17,6 | -8,4  | 22 | 0,0227 | 0,0325 | 0,0208 | 0,01292 | 0,0577  |
| 1871 | 1778 | 515 | 425984 4519282 | -3195 | 16,7  | 13,2  | 36 | 0,0231 | 0,0319 | 0,0269 | 0,01499 | 0,05103 |
| 1619 | 1384 | 354 | 426160 4519477 | -2135 | -15,8 | -2,4  | 21 | 0,0217 | 0,0295 | 0,0238 | 0,01785 | 0,07222 |
| 1829 | 1464 | 293 | 425986 4519337 | -2029 | -12,5 | -6,7  | 32 | 0,0209 | 0,0292 | 0,0285 | 0,0198  | 0,07434 |
| 1732 | 1632 | 493 | 425885 4519965 | -3080 | 9,3   | 12,7  | 19 | 0,0241 | 0,0322 | 0,0179 | 0,01138 | 0,04403 |

|      |      |     |                |       |       |       |    |        |        |        |         |         |
|------|------|-----|----------------|-------|-------|-------|----|--------|--------|--------|---------|---------|
| 1838 | 1083 | 470 | 426385 4519384 | -2328 | -11,7 | -15,4 | 14 | 0,0208 | 0,0298 | 0,0249 | 0,01418 | 0,06727 |
| 1694 | 1325 | 543 | 425513 4519801 | -2825 | -9,1  | 5     | 24 | 0,0234 | 0,0301 | 0,0217 | 0,01495 | 0,04859 |
| 1657 | 1225 | 344 | 426071 4519477 | -2040 | -13,6 | 16,8  | 24 | 0,0204 | 0,028  | 0,0232 | 0,01728 | 0,06687 |
| 1893 | 1760 | 261 | 425624 4519110 | -2035 | -15,3 | -14,2 | 34 | 0,0201 | 0,0275 | 0,0358 | 0,02415 | 0,06572 |
| 1783 | 987  | 449 | 426273 4519986 | -2251 | 8,8   | -3,6  | 15 | 0,0217 | 0,0296 | 0,0204 | 0,01426 | 0,05226 |
| 1449 | 1991 | 473 | 425626 4519547 | -2917 | -3,7  | -9,9  | 13 | 0,0231 | 0,0298 | 0,0221 | 0,01549 | 0,04595 |
| 1802 | 899  | 430 | 426212 4519745 | -2080 | -9,3  | -13,7 | 11 | 0,021  | 0,0283 | 0,0207 | 0,01429 | 0,06319 |
| 1870 | 1501 | 498 | 425626 4519931 | -3106 | 9,8   | 17    | 22 | 0,0236 | 0,0308 | 0,0185 | 0,01126 | 0,04209 |
| 1560 | 1702 | 413 | 425979 4519930 | -2669 | 6,9   | 14,6  | 23 | 0,0228 | 0,0303 | 0,0184 | 0,01357 | 0,04553 |
| 1713 | 1192 | 386 | 425631 4519376 | -2129 | -16,8 | -6,4  | 17 | 0,0197 | 0,0274 | 0,0294 | 0,02173 | 0,0639  |
| 1163 | 1214 | 505 | 425844 4519961 | -2179 | 8,6   | -5,1  | 30 | 0,0214 | 0,0284 | 0,0206 | 0,01916 | 0,0507  |
| 1553 | 1624 | 451 | 426045 4519561 | -2654 | 11,9  | 2,1   | 23 | 0,0214 | 0,0296 | 0,0227 | 0,0159  | 0,05043 |
| 1913 | 1878 | 444 | 426373 4519314 | -3165 | -2,3  | 16,1  | 35 | 0,0212 | 0,0318 | 0,0207 | 0,00965 | 0,04319 |
| 1907 | 1049 | 375 | 425721 4519518 | -2046 | -0,2  | 13,5  | 15 | 0,0193 | 0,0278 | 0,0281 | 0,02029 | 0,0595  |
| 1977 | 1839 | 466 | 426319 4519205 | -3269 | -12   | -13,9 | 13 | 0,0206 | 0,0314 | 0,0219 | 0,00934 | 0,04243 |
| 1885 | 1195 | 401 | 426334 4519947 | -2471 | 16,8  | -17,8 | 15 | 0,0214 | 0,0293 | 0,0181 | 0,01241 | 0,0452  |
| 1450 | 963  | 457 | 426094 4519560 | -2023 | -10,8 | 14,7  | 32 | 0,0193 | 0,0267 | 0,0215 | 0,01641 | 0,06083 |
| 1523 | 1737 | 524 | 425554 4519501 | -3009 | 18,1  | 3,7   | 16 | 0,0222 | 0,0281 | 0,023  | 0,01485 | 0,04217 |
| 859  | 1713 | 489 | 425799 4519209 | -2004 | 4,7   | 6,2   | 12 | 0,0181 | 0,0259 | 0,0282 | 0,02506 | 0,05399 |
| 1389 | 1944 | 352 | 425757 4519599 | -2415 | 7,6   | 16,3  | 21 | 0,0204 | 0,0272 | 0,0214 | 0,01726 | 0,04619 |
| 1737 | 1447 | 429 | 426393 4519907 | -2706 | -10,3 | 10,1  | 34 | 0,0212 | 0,0297 | 0,0162 | 0,00909 | 0,03854 |

|      |      |     |                |       |       |       |    |        |        |        |         |         |
|------|------|-----|----------------|-------|-------|-------|----|--------|--------|--------|---------|---------|
| 1291 | 1208 | 500 | 426188 4519299 | -2214 | -3    | -11,3 | 17 | 0,0184 | 0,0263 | 0,0245 | 0,01645 | 0,05859 |
| 1470 | 1680 | 333 | 426310 4519856 | -2303 | -3,7  | -8,2  | 22 | 0,0207 | 0,0276 | 0,0168 | 0,01239 | 0,0451  |
| 1952 | 1426 | 550 | 426294 4519092 | -3101 | -6,4  | -14   | 16 | 0,019  | 0,0291 | 0,0248 | 0,00995 | 0,04178 |
| 1043 | 1971 | 421 | 426400 4519596 | -2348 | -14,6 | -10,3 | 34 | 0,0202 | 0,0273 | 0,0172 | 0,01357 | 0,04796 |
| 1261 | 1454 | 334 | 426074 4519987 | -2031 | -9,8  | -12,1 | 29 | 0,0203 | 0,0261 | 0,0173 | 0,01474 | 0,04554 |
| 1644 | 1555 | 463 | 426269 4519243 | -2700 | 0,5   | -11,8 | 20 | 0,0189 | 0,028  | 0,0238 | 0,01246 | 0,04598 |
| 1469 | 1188 | 473 | 426258 4519968 | -2405 | -14   | 7,2   | 26 | 0,0208 | 0,0275 | 0,0172 | 0,01136 | 0,04248 |
| 886  | 1874 | 464 | 426127 4519308 | -2184 | 9     | 18,1  | 29 | 0,0185 | 0,0257 | 0,0223 | 0,01782 | 0,05248 |
| 1916 | 1374 | 420 | 426194 4519905 | -2799 | -19,8 | 18,3  | 13 | 0,0211 | 0,0289 | 0,0162 | 0,00866 | 0,0362  |
| 1391 | 1003 | 479 | 426040 4519675 | -2117 | 16,6  | 4,3   | 31 | 0,0181 | 0,0258 | 0,0211 | 0,01689 | 0,0487  |
| 1679 | 1454 | 345 | 426411 4519240 | -2240 | -16,5 | -14,6 | 39 | 0,0185 | 0,0262 | 0,0233 | 0,01225 | 0,05513 |
| 1614 | 1032 | 464 | 425692 4519166 | -2141 | -14   | -0,1  | 39 | 0,0174 | 0,0248 | 0,0312 | 0,01974 | 0,05477 |
| 1349 | 1650 | 378 | 425695 4519020 | -2111 | 15,9  | -5,3  | 13 | 0,0172 | 0,0249 | 0,0344 | 0,02472 | 0,04824 |
| 1531 | 1096 | 509 | 426108 4519925 | -2471 | 4,4   | -2,6  | 10 | 0,0199 | 0,0268 | 0,0179 | 0,01184 | 0,04024 |
| 1221 | 1522 | 522 | 426218 4519503 | -2557 | -7,3  | -5,6  | 16 | 0,019  | 0,0266 | 0,0194 | 0,01281 | 0,04465 |
| 1815 | 1535 | 374 | 425883 4519168 | -2499 | -11   | 5,7   | 22 | 0,0185 | 0,0257 | 0,0267 | 0,01477 | 0,04763 |
| 1443 | 1234 | 437 | 425608 4519172 | -2144 | -9,7  | -4,4  | 16 | 0,0172 | 0,0243 | 0,031  | 0,02098 | 0,04983 |
| 1965 | 1940 | 264 | 425873 4519578 | -2487 | -4,7  | -19   | 18 | 0,0194 | 0,0262 | 0,0195 | 0,012   | 0,0398  |
| 1959 | 1817 | 362 | 425552 4519607 | -3016 | -13,3 | 15,8  | 30 | 0,0202 | 0,0264 | 0,0176 | 0,00967 | 0,03337 |
| 1868 | 1601 | 330 | 426186 4519928 | -2644 | -18,4 | -5,9  | 29 | 0,02   | 0,027  | 0,0151 | 0,00833 | 0,03492 |
| 1363 | 821  | 498 | 426325 4519891 | -2038 | -16,8 | -3,3  | 27 | 0,0189 | 0,0242 | 0,0172 | 0,01102 | 0,04482 |

|      |      |     |                |       |       |       |    |        |        |        |         |         |
|------|------|-----|----------------|-------|-------|-------|----|--------|--------|--------|---------|---------|
| 1472 | 1834 | 484 | 426408 4519351 | -3019 | 18,2  | 8,9   | 33 | 0,0183 | 0,0271 | 0,0185 | 0,00925 | 0,03497 |
| 1646 | 1948 | 485 | 425914 4519172 | -3263 | -18,6 | 0,2   | 15 | 0,0189 | 0,0265 | 0,0205 | 0,00986 | 0,03367 |
| 1984 | 1764 | 211 | 425608 4519536 | -2089 | -10,3 | -15,5 | 34 | 0,0179 | 0,0241 | 0,0211 | 0,01474 | 0,04306 |
| 1848 | 1377 | 432 | 426397 4519201 | -2660 | -18,4 | -14,1 | 18 | 0,0174 | 0,0261 | 0,0219 | 0,00925 | 0,04155 |
| 1374 | 1108 | 495 | 425690 4519389 | -2235 | 0,9   | -15,2 | 30 | 0,0169 | 0,0238 | 0,0249 | 0,01757 | 0,0435  |
| 929  | 1416 | 481 | 426076 4519882 | -2166 | 1,2   | -19,2 | 28 | 0,0185 | 0,0242 | 0,0166 | 0,01357 | 0,03845 |
| 1218 | 1616 | 541 | 425743 4519342 | -2675 | 16,7  | 3,2   | 11 | 0,0184 | 0,0244 | 0,0235 | 0,01532 | 0,03756 |
| 1893 | 1567 | 491 | 425774 4519540 | -3269 | 15,4  | 18,6  | 40 | 0,0194 | 0,026  | 0,0186 | 0,00899 | 0,03105 |
| 1797 | 1206 | 355 | 426130 4519679 | -2321 | -15,3 | 14,8  | 19 | 0,0182 | 0,0247 | 0,0175 | 0,01018 | 0,04075 |
| 1365 | 1819 | 377 | 425553 4519584 | -2510 | 17,4  | -14,7 | 19 | 0,0188 | 0,0243 | 0,0207 | 0,01493 | 0,03502 |
| 1271 | 1242 | 545 | 425892 4519191 | -2377 | 16,5  | 0,4   | 30 | 0,0164 | 0,0236 | 0,0269 | 0,01702 | 0,04248 |
| 1649 | 1561 | 471 | 425856 4519320 | -2879 | -11,7 | 11,2  | 37 | 0,0182 | 0,025  | 0,021  | 0,01098 | 0,03525 |
| 1047 | 1962 | 501 | 425675 4519853 | -2781 | -5,1  | 14,6  | 14 | 0,0196 | 0,0252 | 0,0151 | 0,01065 | 0,03105 |
| 1620 | 1498 | 508 | 426107 4519967 | -3170 | -19,5 | -11,6 | 15 | 0,0192 | 0,0267 | 0,0134 | 0,00639 | 0,02694 |
| 1851 | 1705 | 441 | 425744 4519111 | -3021 | -3,8  | -11,9 | 14 | 0,0183 | 0,0243 | 0,0236 | 0,01091 | 0,03244 |
| 1577 | 1541 | 305 | 425666 4519658 | -2215 | 12,9  | 17,6  | 34 | 0,0171 | 0,0236 | 0,0206 | 0,01531 | 0,03656 |
| 1938 | 1989 | 388 | 425592 4519644 | -3404 | -1,7  | -1,8  | 31 | 0,0193 | 0,0257 | 0,0148 | 0,00683 | 0,02653 |
| 1865 | 1651 | 496 | 426389 4519783 | -3542 | 8,3   | 18,1  | 13 | 0,0185 | 0,0272 | 0,0129 | 0,00475 | 0,0243  |
| 1879 | 1979 | 418 | 426462 4519030 | -3300 | -12,1 | -10,3 | 13 | 0,0167 | 0,0266 | 0,0186 | 0,00633 | 0,02813 |
| 1691 | 1820 | 272 | 425544 4519726 | -2362 | 12    | 15,8  | 35 | 0,0179 | 0,0234 | 0,0188 | 0,01306 | 0,03296 |
| 1316 | 1966 | 312 | 425796 4519441 | -2307 | 0,2   | 7     | 35 | 0,0171 | 0,023  | 0,0195 | 0,01419 | 0,03569 |

|      |      |     |                |       |       |       |    |        |        |        |         |         |
|------|------|-----|----------------|-------|-------|-------|----|--------|--------|--------|---------|---------|
| 1461 | 1991 | 316 | 425887 4519819 | -2562 | 9,9   | -18,8 | 31 | 0,0184 | 0,0242 | 0,0159 | 0,01034 | 0,02934 |
| 1511 | 1465 | 388 | 425977 4519002 | -2303 | -1,4  | 12,8  | 23 | 0,0157 | 0,0226 | 0,0277 | 0,01459 | 0,04141 |
| 1979 | 1792 | 423 | 426316 4519207 | -3302 | -5    | 16,5  | 31 | 0,017  | 0,0259 | 0,0173 | 0,00602 | 0,02709 |
| 890  | 1947 | 460 | 425502 4519551 | -2356 | 5,7   | 19,7  | 35 | 0,0174 | 0,0227 | 0,0194 | 0,01545 | 0,03335 |
| 1085 | 1789 | 443 | 426037 4519407 | -2455 | -2,7  | 13,4  | 25 | 0,0169 | 0,0232 | 0,0186 | 0,01233 | 0,03606 |
| 1296 | 1839 | 414 | 425826 4519153 | -2539 | -7,9  | 10,3  | 13 | 0,0169 | 0,0228 | 0,0232 | 0,01381 | 0,03563 |
| 1712 | 1262 | 386 | 426091 4519678 | -2452 | 6,4   | -2,3  | 25 | 0,0169 | 0,0237 | 0,0176 | 0,01009 | 0,03387 |
| 1039 | 1829 | 373 | 425739 4519935 | -2301 | 7,2   | 6,9   | 15 | 0,0179 | 0,0233 | 0,0149 | 0,01246 | 0,03067 |
| 1844 | 1609 | 304 | 426144 4519918 | -2573 | -12,3 | -0,5  | 27 | 0,0181 | 0,0245 | 0,0142 | 0,00733 | 0,02875 |
| 1640 | 1022 | 506 | 426401 4519179 | -2399 | 3,5   | 20    | 16 | 0,0153 | 0,0233 | 0,0222 | 0,00994 | 0,04046 |
| 1298 | 1708 | 531 | 426092 4519840 | -3110 | 6     | -9,4  | 20 | 0,0182 | 0,0249 | 0,0135 | 0,00672 | 0,0246  |
| 958  | 1888 | 354 | 425671 4519490 | -2080 | 9,3   | 13,5  | 32 | 0,0158 | 0,0219 | 0,0188 | 0,01625 | 0,03329 |
| 1147 | 1112 | 424 | 426309 4519498 | -2022 | -15,6 | 4,5   | 28 | 0,016  | 0,0213 | 0,0157 | 0,01049 | 0,0412  |
| 1761 | 1721 | 431 | 425629 4519418 | -3127 | 3,4   | -3,3  | 20 | 0,0178 | 0,0232 | 0,0179 | 0,00834 | 0,02598 |
| 1217 | 1614 | 534 | 425965 4519853 | -2947 | -14,9 | 13,9  | 29 | 0,0178 | 0,0238 | 0,0136 | 0,00732 | 0,025   |
| 1666 | 1568 | 504 | 425574 4519491 | -3207 | -4,3  | -17,4 | 27 | 0,0176 | 0,023  | 0,0169 | 0,00788 | 0,02514 |
| 842  | 1293 | 547 | 426345 4519806 | -2201 | -2,6  | -8    | 16 | 0,0167 | 0,0215 | 0,0138 | 0,00966 | 0,03272 |
| 1988 | 1570 | 217 | 425738 4519319 | -2043 | -3,5  | 17,4  | 30 | 0,0151 | 0,0213 | 0,0216 | 0,01258 | 0,03525 |
| 1852 | 1973 | 287 | 426153 4519811 | -2844 | 13,3  | 1,5   | 24 | 0,0172 | 0,0238 | 0,0136 | 0,00659 | 0,02371 |
| 1250 | 1367 | 426 | 426197 4519610 | -2374 | -5    | 19,8  | 20 | 0,0159 | 0,0217 | 0,0153 | 0,00922 | 0,03153 |
| 898  | 1834 | 532 | 426238 4519590 | -2613 | 6     | 6,2   | 37 | 0,0164 | 0,0222 | 0,0144 | 0,00888 | 0,02806 |



|      |      |     |                |       |       |       |    |        |        |        |         |         |
|------|------|-----|----------------|-------|-------|-------|----|--------|--------|--------|---------|---------|
| 1628 | 1929 | 468 | 426109 4519949 | -3624 | -17,3 | -16,4 | 31 | 0,0173 | 0,0249 | 0,011  | 0,00389 | 0,01873 |
| 1410 | 1649 | 350 | 425982 4519387 | -2425 | -5,9  | 10,2  | 10 | 0,0154 | 0,0212 | 0,0179 | 0,01022 | 0,03056 |
| 1884 | 1921 | 485 | 426159 4519574 | -3841 | 5,5   | -2,1  | 39 | 0,0165 | 0,0243 | 0,0122 | 0,00381 | 0,01897 |
| 1276 | 1158 | 476 | 426191 4519026 | -2214 | 8,4   | -19   | 27 | 0,0138 | 0,0205 | 0,0234 | 0,0117  | 0,03709 |
| 1919 | 1340 | 535 | 426315 4519823 | -3509 | 0,8   | -11,9 | 18 | 0,0166 | 0,0244 | 0,0116 | 0,00353 | 0,01911 |
| 1055 | 1341 | 500 | 425527 4519283 | -2233 | 10,1  | 15,9  | 34 | 0,0145 | 0,02   | 0,0235 | 0,01596 | 0,02929 |
| 1775 | 1296 | 295 | 425926 4519512 | -2206 | 9,6   | 2,4   | 14 | 0,0144 | 0,0207 | 0,0188 | 0,01075 | 0,03004 |
| 1778 | 1313 | 488 | 426154 4519074 | -2837 | 5,9   | 19,7  | 40 | 0,0147 | 0,0218 | 0,0217 | 0,00835 | 0,02707 |
| 1149 | 1939 | 373 | 425813 4519839 | -2581 | -8,9  | 17,1  | 23 | 0,0166 | 0,0214 | 0,0131 | 0,00824 | 0,0236  |
| 1383 | 1161 | 452 | 426249 4519034 | -2273 | -13,3 | -6,2  | 22 | 0,0139 | 0,02   | 0,0221 | 0,00966 | 0,03564 |
| 1329 | 1848 | 347 | 426388 4519414 | -2529 | -17,8 | 13,6  | 31 | 0,0153 | 0,0213 | 0,0142 | 0,00721 | 0,02714 |
| 1927 | 1459 | 251 | 425850 4519515 | -2241 | 12,9  | -15,7 | 23 | 0,0145 | 0,0204 | 0,0182 | 0,01051 | 0,02779 |
| 1194 | 1645 | 400 | 425783 4519829 | -2540 | -11,9 | -3,7  | 17 | 0,0161 | 0,0209 | 0,0141 | 0,00865 | 0,02373 |
| 1304 | 1731 | 476 | 425688 4519683 | -2994 | -5,5  | 13    | 21 | 0,0165 | 0,0216 | 0,0141 | 0,00708 | 0,02163 |
| 1556 | 1465 | 438 | 425838 4519843 | -2902 | 6,9   | 9,1   | 13 | 0,0164 | 0,0218 | 0,0138 | 0,00652 | 0,0215  |
| 807  | 1607 | 548 | 426029 4519539 | -2430 | -19,3 | 9,1   | 18 | 0,0147 | 0,0198 | 0,0147 | 0,00936 | 0,02661 |
| 1283 | 1345 | 320 | 426346 4519950 | -2136 | -8,2  | 17,6  | 38 | 0,0157 | 0,0199 | 0,0126 | 0,00714 | 0,02483 |
| 1861 | 1972 | 355 | 426432 4519707 | -3402 | -16,5 | -17,7 | 26 | 0,0155 | 0,0233 | 0,0108 | 0,00325 | 0,01653 |
| 1089 | 1621 | 388 | 425961 4519602 | -2352 | 14,3  | 5     | 24 | 0,0145 | 0,0198 | 0,0151 | 0,00987 | 0,02518 |
| 1529 | 1791 | 442 | 426013 4519633 | -3235 | 11,9  | 14,8  | 13 | 0,0157 | 0,0218 | 0,013  | 0,0052  | 0,01913 |
| 1735 | 820  | 383 | 425577 4519447 | -2024 | -10,7 | 16,3  | 14 | 0,0131 | 0,0189 | 0,019  | 0,011   | 0,02818 |

|      |      |     |                |       |       |       |    |        |        |        |         |         |         |
|------|------|-----|----------------|-------|-------|-------|----|--------|--------|--------|---------|---------|---------|
| 1756 | 1891 | 436 | 425812 4519634 | -3608 | 2,3   | -18,2 | 32 | 0,0157 | 0,022  | 0,0121 | 0,0041  | 0,0171  |         |
| 1924 | 1401 | 206 | 426218 4519513 | -2032 | -13,6 | 13,6  | 31 | 0,0143 | 0,0193 | 0,0143 | 0,00655 |         | 0,02919 |
| 1093 | 1429 | 372 | 425545 4519741 | -2175 | 8,8   | -11,3 | 36 | 0,0141 | 0,0192 | 0,0159 | 0,01131 |         | 0,02276 |
| 1822 | 1942 | 314 | 425943 4519576 | -3006 | -4,7  | 6,3   | 14 | 0,0154 | 0,0212 | 0,0133 | 0,0052  | 0,01903 |         |
| 1693 | 1908 | 231 | 426458 4519287 | -2305 | 11,1  | -6,1  | 16 | 0,0136 | 0,02   | 0,0158 | 0,00733 |         | 0,02601 |
| 1526 | 1472 | 371 | 425854 4519052 | -2421 | 13,7  | -5,5  | 20 | 0,0134 | 0,0189 | 0,0229 | 0,01151 |         | 0,02567 |
| 1474 | 1183 | 348 | 426084 4519077 | -2055 | 6,2   | -2,5  | 35 | 0,0125 | 0,0186 | 0,0217 | 0,01052 |         | 0,031   |
| 1969 | 1163 | 470 | 425633 4519331 | -2943 | -13,2 | 0,9   | 26 | 0,0146 | 0,0195 | 0,0175 | 0,0068  | 0,02123 |         |
| 835  | 1670 | 388 | 425577 4519970 | -2168 | 5,4   | 8,2   | 27 | 0,0143 | 0,0189 | 0,0126 | 0,00966 |         | 0,01994 |
| 1812 | 1645 | 495 | 425758 4519692 | -3726 | 13,7  | -13,1 | 40 | 0,0151 | 0,0209 | 0,0114 | 0,00367 |         | 0,01528 |
| 1547 | 1077 | 353 | 425705 4519512 | -2166 | 1,5   | 18    | 23 | 0,0128 | 0,0181 | 0,0173 | 0,00981 |         | 0,0236  |
| 1583 | 1058 | 520 | 425548 4519084 | -2541 | 7,9   | -15,7 | 27 | 0,0136 | 0,0175 | 0,0235 | 0,01109 |         | 0,02202 |
| 1953 | 1305 | 380 | 425815 4519565 | -2824 | 0,8   | 11,1  | 30 | 0,0142 | 0,0194 | 0,0151 | 0,0058  | 0,01887 |         |
| 1590 | 1380 | 439 | 425959 4519582 | -2869 | -6,5  | -2,7  | 38 | 0,0142 | 0,0196 | 0,0139 | 0,00561 |         | 0,01888 |
| 1866 | 1642 | 438 | 425898 4519356 | -3441 | -15,3 | 7,7   | 34 | 0,0142 | 0,0203 | 0,0135 | 0,00417 |         | 0,01646 |
| 1528 | 815  | 526 | 426123 4519975 | -2470 | 13,1  | -16,1 | 38 | 0,0142 | 0,019  | 0,0128 | 0,00599 |         | 0,0188  |
| 1637 | 1529 | 285 | 426044 4519911 | -2460 | 6,6   | -12,5 | 12 | 0,0144 | 0,0192 | 0,0125 | 0,00595 |         | 0,01854 |
| 1959 | 1002 | 372 | 425683 4519109 | -2286 | -1,3  | 10,1  | 35 | 0,0125 | 0,0176 | 0,0226 | 0,00966 |         | 0,02473 |
| 1978 | 1183 | 410 | 426326 4519700 | -2885 | -8,4  | 13,7  | 26 | 0,014  | 0,0205 | 0,0124 | 0,0037  | 0,01677 |         |
| 1419 | 1511 | 460 | 426392 4519351 | -2898 | 18,8  | -8,9  | 38 | 0,0132 | 0,0197 | 0,0143 | 0,00531 |         | 0,01915 |
| 1461 | 1545 | 386 | 426357 4519896 | -2835 | 18,5  | 18,1  | 35 | 0,0143 | 0,02   | 0,0113 | 0,00452 |         | 0,01639 |

|      |      |     |                |       |       |       |    |        |        |        |         |         |
|------|------|-----|----------------|-------|-------|-------|----|--------|--------|--------|---------|---------|
| 1073 | 1558 | 533 | 426490 4519505 | -2798 | 11,6  | 6,4   | 32 | 0,0135 | 0,0195 | 0,0123 | 0,005   | 0,01869 |
| 1857 | 1547 | 256 | 426341 4519796 | -2501 | 16,3  | 3     | 39 | 0,0135 | 0,0192 | 0,0125 | 0,00542 | 0,0185  |
| 1967 | 1087 | 455 | 425719 4519291 | -2789 | -6    | -7,6  | 29 | 0,0135 | 0,0182 | 0,0177 | 0,00662 | 0,01983 |
| 1362 | 1560 | 329 | 425546 4519743 | -2435 | 2,7   | -6,9  | 36 | 0,0139 | 0,0181 | 0,0142 | 0,00788 | 0,0186  |
| 1250 | 1683 | 352 | 425778 4519315 | -2411 | 10,2  | 17,1  | 18 | 0,0129 | 0,0176 | 0,0174 | 0,00935 | 0,02078 |
| 1235 | 1957 | 232 | 425636 4519518 | -2110 | -18,3 | 4,8   | 27 | 0,013  | 0,0174 | 0,0141 | 0,0095  | 0,02046 |
| 1598 | 1434 | 438 | 425602 4519667 | -3021 | -12,2 | -17,7 | 26 | 0,0143 | 0,0188 | 0,0131 | 0,00532 | 0,01648 |
| 1014 | 1105 | 476 | 426278 4519431 | -2171 | -8,1  | -6,3  | 38 | 0,0126 | 0,0171 | 0,0135 | 0,00697 | 0,02531 |
| 1605 | 1927 | 293 | 425618 4519247 | -2613 | 6,1   | 14,7  | 28 | 0,0138 | 0,0176 | 0,0178 | 0,00827 | 0,01856 |
| 1899 | 1864 | 310 | 426025 4519808 | -3210 | 6,4   | -15,3 | 16 | 0,0143 | 0,0201 | 0,0107 | 0,00325 | 0,01385 |
| 1446 | 833  | 545 | 426145 4519093 | -2293 | -2,9  | 4,4   | 38 | 0,0117 | 0,0173 | 0,0192 | 0,00766 | 0,02606 |
| 1847 | 1934 | 400 | 425598 4519997 | -3833 | -7    | 10,4  | 26 | 0,0145 | 0,0204 | 0,0091 | 0,0024  | 0,01176 |
| 1492 | 1734 | 544 | 425858 4519465 | -3635 | 18,4  | -9,4  | 12 | 0,014  | 0,0194 | 0,0123 | 0,00398 | 0,01411 |
| 1427 | 1841 | 510 | 425667 4519059 | -3378 | -14,2 | 10,9  | 22 | 0,014  | 0,0182 | 0,0161 | 0,00574 | 0,01556 |
| 1285 | 1633 | 507 | 425635 4519277 | -3000 | 11,6  | -19   | 39 | 0,0139 | 0,0177 | 0,0164 | 0,00689 | 0,0166  |
| 1666 | 1238 | 424 | 425797 4519285 | -2650 | 17,3  | 9,8   | 13 | 0,0128 | 0,0175 | 0,0188 | 0,0082  | 0,01905 |
| 1200 | 1843 | 441 | 426285 4519145 | -2798 | -17,9 | -19,5 | 17 | 0,0127 | 0,0187 | 0,0154 | 0,00569 | 0,01896 |
| 1084 | 1555 | 358 | 426233 4519679 | -2317 | -6,8  | 16,6  | 18 | 0,0132 | 0,0174 | 0,0116 | 0,00606 | 0,01959 |
| 1838 | 1636 | 309 | 425540 4519363 | -2773 | -11,7 | -0,8  | 16 | 0,0136 | 0,0174 | 0,0156 | 0,00636 | 0,01722 |
| 1648 | 1841 | 333 | 425660 4519045 | -2765 | 0,8   | -13,2 | 37 | 0,0134 | 0,0171 | 0,0188 | 0,00766 | 0,01724 |
| 1933 | 1884 | 463 | 426378 4519864 | -4043 | 5,7   | 10,6  | 22 | 0,0136 | 0,0205 | 0,0087 | 0,00161 | 0,00982 |

|      |      |     |                |       |       |       |    |        |        |        |         |         |
|------|------|-----|----------------|-------|-------|-------|----|--------|--------|--------|---------|---------|
| 1724 | 1786 | 518 | 426031 4519486 | -3887 | 5,1   | -3,5  | 29 | 0,0132 | 0,0194 | 0,0109 | 0,00263 | 0,01185 |
| 1478 | 1241 | 424 | 425970 4519651 | -2647 | -5,8  | -19,2 | 37 | 0,0129 | 0,0176 | 0,0129 | 0,00541 | 0,017   |
| 1814 | 1690 | 327 | 426479 4519541 | -3036 | 19,6  | -1,4  | 14 | 0,0127 | 0,019  | 0,0118 | 0,00351 | 0,0142  |
| 1310 | 1034 | 398 | 425992 4519877 | -2272 | -7,6  | -9,2  | 36 | 0,0127 | 0,0167 | 0,0121 | 0,00583 | 0,01734 |
| 1862 | 1697 | 435 | 425810 4519088 | -3513 | -19,8 | 9,1   | 18 | 0,0128 | 0,0181 | 0,0143 | 0,00401 | 0,01361 |
| 1474 | 1306 | 517 | 426474 4519344 | -2999 | -7,6  | 0,6   | 22 | 0,0121 | 0,0186 | 0,0125 | 0,00352 | 0,01509 |
| 1658 | 1608 | 250 | 425574 4519689 | -2417 | -11,4 | 11,3  | 35 | 0,0129 | 0,0167 | 0,013  | 0,00623 | 0,01643 |
| 1678 | 1401 | 286 | 425954 4519504 | -2441 | -19,2 | 11,4  | 20 | 0,0124 | 0,0167 | 0,013  | 0,00549 | 0,01867 |
| 1395 | 1847 | 390 | 425961 4519394 | -2968 | 7,9   | -6,7  | 22 | 0,013  | 0,0177 | 0,0134 | 0,00502 | 0,01454 |
| 1720 | 1329 | 531 | 426120 4519094 | -3249 | 1     | -19,4 | 37 | 0,0122 | 0,0179 | 0,0153 | 0,00421 | 0,01459 |
| 898  | 1965 | 357 | 426247 4519424 | -2321 | 13,8  | -11,1 | 20 | 0,0122 | 0,0166 | 0,0125 | 0,00651 | 0,0183  |
| 1758 | 1896 | 400 | 426474 4519024 | -3442 | 1,3   | 16,9  | 12 | 0,0119 | 0,0189 | 0,0131 | 0,00291 | 0,01255 |
| 1609 | 804  | 345 | 425622 4519928 | -2064 | -12,3 | 8,5   | 11 | 0,012  | 0,0162 | 0,0134 | 0,0064  | 0,01624 |
| 1753 | 1722 | 365 | 426292 4519942 | -3382 | -2,4  | -7,5  | 21 | 0,0135 | 0,0194 | 0,0091 | 0,00207 | 0,01047 |
| 1926 | 1144 | 514 | 426064 4519959 | -3457 | -2,5  | 8,5   | 29 | 0,0133 | 0,0192 | 0,0098 | 0,00213 | 0,01094 |
| 1775 | 827  | 422 | 425642 4519079 | -2232 | -13,5 | 8,4   | 11 | 0,0111 | 0,0155 | 0,02   | 0,00807 | 0,02121 |
| 1459 | 1930 | 208 | 425737 4519844 | -2247 | 19,4  | 11,9  | 34 | 0,0124 | 0,0167 | 0,0118 | 0,007   | 0,0152  |
| 1322 | 1249 | 547 | 425521 4519193 | -2785 | -5,5  | 12    | 27 | 0,0126 | 0,0158 | 0,0176 | 0,00743 | 0,01558 |
| 1553 | 916  | 426 | 425542 4519691 | -2427 | -18,5 | -3,2  | 29 | 0,0119 | 0,0159 | 0,0135 | 0,00623 | 0,01642 |
| 1293 | 1564 | 288 | 425925 4519012 | -2151 | -17,6 | 3,2   | 34 | 0,011  | 0,0152 | 0,0174 | 0,00778 | 0,02058 |
| 983  | 1167 | 398 | 426339 4519712 | -2108 | 12,3  | -0,8  | 31 | 0,012  | 0,0155 | 0,0109 | 0,00544 | 0,01801 |

|      |      |     |                |       |       |       |    |        |        |        |         |         |
|------|------|-----|----------------|-------|-------|-------|----|--------|--------|--------|---------|---------|
| 1575 | 1601 | 546 | 425924 4519700 | -3776 | -6,7  | -16,6 | 27 | 0,0127 | 0,0185 | 0,0098 | 0,0023  | 0,01043 |
| 1089 | 1788 | 442 | 425995 4519899 | -2967 | -14,8 | 11,8  | 16 | 0,0131 | 0,0174 | 0,0097 | 0,00349 | 0,0114  |
| 1561 | 1914 | 245 | 425978 4519520 | -2517 | -12,1 | 1,8   | 26 | 0,0121 | 0,0162 | 0,012  | 0,00493 | 0,01469 |
| 1866 | 1923 | 301 | 425633 4519609 | -3258 | 11,2  | 17,1  | 15 | 0,0128 | 0,017  | 0,0111 | 0,00338 | 0,01115 |
| 1063 | 1492 | 298 | 425503 4519758 | -2121 | -11,5 | 10    | 31 | 0,0113 | 0,0154 | 0,012  | 0,00741 | 0,01425 |
| 1765 | 1674 | 261 | 426444 4519679 | -2662 | 14,4  | 15    | 28 | 0,0117 | 0,0171 | 0,011  | 0,00355 | 0,01309 |
| 1219 | 1953 | 425 | 425746 4519560 | -3145 | 7,3   | 16,9  | 20 | 0,0126 | 0,0167 | 0,0112 | 0,00393 | 0,01157 |
| 1651 | 1582 | 315 | 425853 4519376 | -2702 | -14,9 | -17,1 | 15 | 0,0116 | 0,0157 | 0,0136 | 0,00488 | 0,01435 |
| 1352 | 1223 | 547 | 426418 4519741 | -3053 | -8,1  | -0,7  | 30 | 0,012  | 0,0174 | 0,0099 | 0,00261 | 0,01083 |
| 1657 | 1761 | 460 | 426409 4519557 | -3736 | 19,1  | 8,1   | 31 | 0,0117 | 0,0177 | 0,0095 | 0,00188 | 0,00904 |
| 1544 | 1641 | 456 | 425755 4519425 | -3425 | -16,4 | 17,2  | 36 | 0,012  | 0,0165 | 0,0113 | 0,00314 | 0,01058 |
| 1534 | 1494 | 326 | 426202 4519464 | -2627 | -17,7 | 0,7   | 30 | 0,0114 | 0,0158 | 0,0117 | 0,00388 | 0,01415 |
| 1733 | 1212 | 521 | 425698 4519210 | -3201 | 4,1   | 7,2   | 22 | 0,0117 | 0,0154 | 0,0145 | 0,00417 | 0,01129 |
| 1301 | 1596 | 416 | 426119 4519833 | -2999 | 7,3   | 18,2  | 36 | 0,012  | 0,0166 | 0,0098 | 0,00293 | 0,01018 |
| 879  | 1925 | 454 | 426361 4519704 | -2744 | 9,9   | -15,3 | 22 | 0,0119 | 0,0162 | 0,01   | 0,00361 | 0,01104 |
| 1348 | 1964 | 446 | 426104 4519681 | -3569 | -10   | -15,8 | 18 | 0,0118 | 0,0172 | 0,0092 | 0,00203 | 0,00861 |
| 1560 | 1992 | 187 | 425541 4519586 | -2252 | -9    | -10,5 | 23 | 0,0112 | 0,0146 | 0,0123 | 0,00593 | 0,01253 |
| 1471 | 1199 | 539 | 426470 4519305 | -3048 | 5,7   | -16,7 | 34 | 0,0106 | 0,0164 | 0,0117 | 0,00277 | 0,01142 |
| 1913 | 1347 | 387 | 425627 4519880 | -3327 | 15,1  | -1,1  | 25 | 0,012  | 0,0163 | 0,0097 | 0,00247 | 0,00947 |
| 1649 | 1772 | 415 | 426361 4519820 | -3696 | -19,2 | 11,7  | 31 | 0,0117 | 0,0176 | 0,008  | 0,00137 | 0,00724 |
| 1244 | 1075 | 389 | 425737 4519821 | -2354 | -19,3 | -7,9  | 29 | 0,0109 | 0,0144 | 0,0112 | 0,00493 | 0,01248 |

|      |      |     |                |       |       |       |    |        |        |        |         |         |
|------|------|-----|----------------|-------|-------|-------|----|--------|--------|--------|---------|---------|
| 1874 | 1666 | 415 | 425681 4519300 | -3638 | -11,2 | -3,5  | 17 | 0,0114 | 0,0159 | 0,0114 | 0,0026  | 0,00916 |
| 1884 | 1166 | 452 | 425880 4519292 | -3081 | -17,4 | -19,1 | 30 | 0,0108 | 0,0154 | 0,013  | 0,00348 | 0,01153 |
| 1546 | 1985 | 497 | 426051 4519250 | -3898 | 0,1   | -19,5 | 18 | 0,0111 | 0,0166 | 0,0106 | 0,00208 | 0,00831 |
| 1349 | 1085 | 502 | 425607 4519153 | -2578 | -5    | 1,7   | 33 | 0,0106 | 0,0138 | 0,0167 | 0,00652 | 0,01314 |
| 1168 | 1685 | 526 | 425646 4519667 | -3376 | -8    | 18,1  | 33 | 0,0117 | 0,0157 | 0,0098 | 0,00282 | 0,00908 |
| 924  | 1475 | 423 | 426201 4519401 | -2382 | 16,8  | 12,8  | 24 | 0,0102 | 0,0141 | 0,0117 | 0,00489 | 0,01407 |
| 1687 | 1577 | 473 | 425606 4519086 | -3512 | 3,1   | 4,7   | 35 | 0,0115 | 0,0148 | 0,0133 | 0,00347 | 0,00921 |
| 1699 | 1821 | 386 | 425802 4519711 | -3636 | 13,5  | 8,8   | 34 | 0,0115 | 0,0162 | 0,0092 | 0,00204 | 0,0082  |
| 1813 | 931  | 433 | 426188 4519035 | -2508 | 4,8   | 11,2  | 28 | 0,0095 | 0,0144 | 0,0165 | 0,00455 | 0,01449 |
| 1849 | 1445 | 481 | 425743 4519287 | -3630 | 15,2  | 10,1  | 13 | 0,0112 | 0,0151 | 0,0119 | 0,00282 | 0,00875 |
| 1857 | 854  | 541 | 425509 4519619 | -3004 | 17,9  | -4,5  | 18 | 0,0113 | 0,0144 | 0,0123 | 0,0037  | 0,01018 |
| 1826 | 1167 | 383 | 425733 4519230 | -2721 | -4,1  | 12,2  | 30 | 0,0105 | 0,014  | 0,0147 | 0,00455 | 0,01162 |
| 1808 | 1482 | 244 | 426140 4519819 | -2575 | 18,7  | -12,7 | 37 | 0,0108 | 0,0149 | 0,0104 | 0,00348 | 0,01014 |
| 1014 | 1882 | 517 | 425873 4519836 | -3353 | 1,4   | -19,3 | 40 | 0,0115 | 0,0158 | 0,0091 | 0,00228 | 0,0079  |
| 1142 | 1071 | 539 | 425753 4519662 | -2644 | 16,9  | 3,2   | 24 | 0,0105 | 0,0141 | 0,0119 | 0,00471 | 0,01073 |
| 1974 | 1499 | 373 | 426130 4519814 | -3541 | 14,3  | 9,7   | 14 | 0,011  | 0,0162 | 0,0089 | 0,00153 | 0,00751 |
| 1510 | 1129 | 529 | 426415 4519099 | -2931 | -9,7  | 14,6  | 13 | 0,0096 | 0,0152 | 0,0127 | 0,00282 | 0,0111  |
| 1674 | 1841 | 434 | 425838 4519698 | -3860 | -18,9 | 11,7  | 23 | 0,011  | 0,0162 | 0,0083 | 0,00149 | 0,00694 |
| 1100 | 1140 | 410 | 426042 4519185 | -2226 | -0,7  | 16,7  | 14 | 0,0093 | 0,0132 | 0,0138 | 0,00536 | 0,01457 |
| 1243 | 1538 | 506 | 425737 4519538 | -3208 | 8,1   | 19,4  | 25 | 0,011  | 0,0148 | 0,0108 | 0,00312 | 0,00896 |
| 1705 | 1798 | 334 | 426326 4519959 | -3464 | -4,9  | -7    | 37 | 0,0113 | 0,0165 | 0,0078 | 0,00122 | 0,0064  |

|      |      |     |                |       |       |       |    |        |        |        |         |         |
|------|------|-----|----------------|-------|-------|-------|----|--------|--------|--------|---------|---------|
| 1994 | 1776 | 320 | 425670 4519371 | -3440 | 15    | -1,3  | 13 | 0,011  | 0,0147 | 0,011  | 0,00265 | 0,00821 |
| 1608 | 1569 | 487 | 426230 4519669 | -3727 | 10    | 5,9   | 12 | 0,0107 | 0,0161 | 0,0087 | 0,00143 | 0,00709 |
| 1825 | 991  | 430 | 425644 4519819 | -2885 | -1,1  | 19,8  | 34 | 0,011  | 0,0146 | 0,0108 | 0,00292 | 0,00892 |
| 1998 | 1731 | 447 | 425709 4519438 | -4021 | -15,6 | 12,6  | 22 | 0,0104 | 0,0158 | 0,0091 | 0,0015  | 0,00654 |
| 1972 | 1186 | 216 | 425761 4519822 | -2204 | 11,8  | 6,8   | 38 | 0,0098 | 0,0136 | 0,0119 | 0,00437 | 0,01049 |
| 1565 | 1355 | 512 | 426471 4519640 | -3535 | -6,4  | -18,5 | 37 | 0,0103 | 0,0159 | 0,0084 | 0,0013  | 0,00669 |
| 1644 | 1520 | 428 | 425862 4519082 | -3213 | 6,8   | 5,5   | 22 | 0,0104 | 0,0139 | 0,0134 | 0,00332 | 0,00879 |
| 1513 | 1482 | 303 | 426461 4519977 | -2683 | -2,9  | 17,8  | 24 | 0,011  | 0,015  | 0,0088 | 0,00211 | 0,00763 |
| 1663 | 1729 | 428 | 425696 4519826 | -3825 | -9,4  | 12,4  | 22 | 0,0107 | 0,0156 | 0,008  | 0,0014  | 0,00644 |
| 1788 | 1448 | 207 | 426203 4519567 | -2265 | 18,1  | 10,7  | 39 | 0,0093 | 0,0134 | 0,0116 | 0,00416 | 0,01102 |
| 1976 | 1405 | 241 | 426168 4519538 | -2524 | 4,9   | -6,1  | 27 | 0,0097 | 0,014  | 0,0112 | 0,00298 | 0,01016 |
| 1981 | 993  | 318 | 425608 4519638 | -2500 | 18    | -3,1  | 12 | 0,01   | 0,0133 | 0,013  | 0,00434 | 0,01019 |
| 1139 | 1346 | 499 | 425528 4519194 | -2716 | 14,8  | -1,4  | 18 | 0,0103 | 0,0126 | 0,0149 | 0,0056  | 0,00956 |
| 893  | 1803 | 547 | 425703 4519098 | -2901 | -3,1  | -17,4 | 15 | 0,0103 | 0,0131 | 0,014  | 0,00469 | 0,00921 |
| 1727 | 1788 | 357 | 425541 4519706 | -3595 | 15,7  | 18    | 29 | 0,0107 | 0,0146 | 0,0089 | 0,00203 | 0,00697 |
| 1933 | 1951 | 251 | 425644 4519276 | -3042 | 8,4   | -11,6 | 39 | 0,0106 | 0,0135 | 0,0118 | 0,00309 | 0,00795 |
| 1583 | 1740 | 514 | 426358 4519878 | -4041 | 11,7  | -19,5 | 35 | 0,0105 | 0,016  | 0,0074 | 0,00087 | 0,00505 |
| 1318 | 1740 | 334 | 426368 4519923 | -2916 | -9,9  | 0,7   | 36 | 0,0109 | 0,0149 | 0,0082 | 0,00189 | 0,00674 |
| 1783 | 1287 | 290 | 426080 4519659 | -2624 | -16,3 | 15,6  | 37 | 0,0101 | 0,0137 | 0,0101 | 0,00256 | 0,00915 |
| 1914 | 1543 | 330 | 426481 4519635 | -3312 | -4,4  | -7,9  | 39 | 0,01   | 0,0153 | 0,0084 | 0,00118 | 0,00624 |
| 1453 | 1973 | 241 | 426167 4519771 | -2693 | 18,6  | 11    | 18 | 0,0102 | 0,0139 | 0,0091 | 0,00278 | 0,00782 |

|      |      |     |                |       |       |       |    |        |        |        |         |         |
|------|------|-----|----------------|-------|-------|-------|----|--------|--------|--------|---------|---------|
| 873  | 1704 | 300 | 425940 4519873 | -2212 | 3,8   | -13,9 | 28 | 0,0098 | 0,0126 | 0,0094 | 0,00405 | 0,00834 |
| 1855 | 1375 | 269 | 425967 4519154 | -2504 | -6,3  | 19,9  | 18 | 0,0091 | 0,0127 | 0,0134 | 0,00367 | 0,0105  |
| 1584 | 1632 | 306 | 426419 4519757 | -2943 | -2,2  | 1,6   | 21 | 0,0101 | 0,0146 | 0,0085 | 0,00165 | 0,00664 |
| 1795 | 1152 | 314 | 426291 4519171 | -2497 | -16,1 | 6     | 32 | 0,009  | 0,0128 | 0,012  | 0,00268 | 0,01136 |
| 1759 | 1784 | 362 | 425825 4519938 | -3762 | 2,1   | 1,1   | 10 | 0,0103 | 0,0149 | 0,0075 | 0,00106 | 0,00551 |
| 1500 | 2000 | 300 | 426100 4519300 | -3000 | 5     | 5     | 15 | 0,0097 | 0,0137 | 0,0105 | 0,00257 | 0,00756 |
| 1402 | 1115 | 405 | 425906 4519311 | -2525 | 12,8  | 7,8   | 17 | 0,0089 | 0,0124 | 0,0131 | 0,00437 | 0,00971 |
| 1386 | 934  | 317 | 426348 4519411 | -2080 | 4,3   | -15,2 | 16 | 0,0088 | 0,0119 | 0,0101 | 0,00316 | 0,01206 |
| 1547 | 1267 | 339 | 425721 4519028 | -2481 | -7,4  | -4,2  | 29 | 0,009  | 0,0118 | 0,0153 | 0,00482 | 0,01012 |
| 937  | 1422 | 339 | 425981 4519237 | -2152 | -1,2  | 13,1  | 35 | 0,0085 | 0,0117 | 0,0118 | 0,00465 | 0,01086 |
| 1403 | 1577 | 226 | 425546 4519279 | -2195 | -10,2 | -13,1 | 11 | 0,0087 | 0,0117 | 0,0129 | 0,00517 | 0,00936 |
| 893  | 1748 | 386 | 425561 4519493 | -2522 | -11,1 | -14,7 | 12 | 0,0094 | 0,0122 | 0,0113 | 0,00449 | 0,00788 |
| 1805 | 1833 | 331 | 426357 4519111 | -3402 | -11,3 | -19,9 | 33 | 0,0088 | 0,0141 | 0,0101 | 0,00149 | 0,00621 |
| 1000 | 968  | 543 | 426171 4519926 | -2517 | -18,3 | 19,6  | 36 | 0,0099 | 0,0125 | 0,0091 | 0,00266 | 0,00755 |
| 1355 | 881  | 496 | 426191 4519894 | -2632 | 11,2  | -1,8  | 26 | 0,0096 | 0,0129 | 0,0094 | 0,00244 | 0,00734 |
| 1601 | 1543 | 301 | 426184 4519274 | -2729 | -17,1 | 5,1   | 31 | 0,009  | 0,0128 | 0,0107 | 0,00253 | 0,00867 |
| 1938 | 1244 | 348 | 426255 4519157 | -2860 | 11    | 14,8  | 21 | 0,0086 | 0,0131 | 0,0127 | 0,00254 | 0,00813 |
| 1974 | 1282 | 440 | 425524 4519697 | -3698 | 17,1  | 18,1  | 14 | 0,0098 | 0,0134 | 0,0089 | 0,0017  | 0,00581 |
| 1659 | 1529 | 377 | 426467 4519884 | -3459 | 3,2   | -1,1  | 38 | 0,0099 | 0,0147 | 0,0075 | 0,00092 | 0,00477 |
| 1084 | 1279 | 333 | 425995 4519686 | -2284 | -2,5  | -3,4  | 23 | 0,009  | 0,0119 | 0,0097 | 0,00351 | 0,00869 |
| 1063 | 1436 | 285 | 426025 4519176 | -2078 | 6,4   | 17,5  | 14 | 0,0082 | 0,0114 | 0,012  | 0,00453 | 0,01066 |



|      |      |     |                |       |       |       |    |        |        |        |         |         |
|------|------|-----|----------------|-------|-------|-------|----|--------|--------|--------|---------|---------|
| 1617 | 1756 | 388 | 426036 4519884 | -3734 | -11,5 | 9,7   | 10 | 0,0098 | 0,0145 | 0,0073 | 0,00088 | 0,00477 |
| 968  | 1459 | 520 | 426354 4519792 | -2941 | -10,3 | -4    | 23 | 0,0097 | 0,0134 | 0,0083 | 0,00185 | 0,00614 |
| 882  | 1278 | 471 | 426493 4519946 | -2501 | 9,6   | 19,8  | 21 | 0,0099 | 0,0125 | 0,0082 | 0,00227 | 0,00689 |
| 1039 | 1689 | 442 | 426342 4519975 | -3095 | -12   | 0,7   | 15 | 0,0101 | 0,0138 | 0,0076 | 0,00142 | 0,00498 |
| 1924 | 1795 | 166 | 426252 4519055 | -2207 | -9,3  | -13,7 | 21 | 0,0085 | 0,0117 | 0,0126 | 0,00296 | 0,01011 |
| 1006 | 1469 | 382 | 426385 4519604 | -2518 | 18,8  | -5,7  | 30 | 0,0091 | 0,0121 | 0,009  | 0,00263 | 0,00802 |
| 986  | 1561 | 271 | 426289 4519937 | -2189 | -4    | 18,1  | 31 | 0,0096 | 0,0115 | 0,008  | 0,00264 | 0,00726 |
| 1165 | 1989 | 280 | 426401 4519661 | -2628 | -4,9  | -7,4  | 28 | 0,0094 | 0,0127 | 0,0083 | 0,00213 | 0,00648 |
| 1001 | 853  | 426 | 426370 4519633 | -2098 | -17,4 | -12,6 | 31 | 0,0089 | 0,0107 | 0,0085 | 0,00266 | 0,00971 |
| 1726 | 1153 | 242 | 426461 4519530 | -2268 | -19,8 | -6    | 14 | 0,0089 | 0,0114 | 0,0088 | 0,00199 | 0,00923 |
| 1621 | 1176 | 473 | 426108 4519565 | -3262 | -13,6 | 9,1   | 38 | 0,0089 | 0,0132 | 0,0089 | 0,0014  | 0,00564 |
| 1523 | 1708 | 366 | 425733 4519153 | -3195 | -12,5 | 16,3  | 16 | 0,0092 | 0,012  | 0,011  | 0,00246 | 0,00615 |
| 1143 | 1471 | 293 | 426272 4519605 | -2333 | -7    | -14,8 | 11 | 0,0088 | 0,0114 | 0,009  | 0,00261 | 0,00811 |
| 1026 | 1950 | 375 | 426282 4519200 | -2772 | 2,6   | 6,8   | 12 | 0,0086 | 0,0121 | 0,0102 | 0,00257 | 0,00709 |
| 1937 | 1970 | 291 | 426227 4519931 | -3769 | 16,4  | 3,1   | 18 | 0,0094 | 0,0139 | 0,007  | 0,00068 | 0,00405 |
| 1447 | 1827 | 358 | 425970 4519970 | -3532 | 18,4  | 1,2   | 37 | 0,0095 | 0,0136 | 0,0072 | 0,00104 | 0,00455 |
| 1886 | 890  | 314 | 426151 4519371 | -2370 | -17,6 | -10   | 31 | 0,0083 | 0,0112 | 0,0104 | 0,00223 | 0,00964 |
| 800  | 1870 | 533 | 425616 4519361 | -2992 | -19,8 | 9     | 30 | 0,0092 | 0,0117 | 0,0103 | 0,00304 | 0,00609 |
| 1500 | 1000 | 550 | 426100 4519300 | -3000 | 5     | 5     | 10 | 0,0084 | 0,0121 | 0,011  | 0,00224 | 0,00679 |
| 1789 | 885  | 379 | 425978 4519631 | -2574 | -2,7  | -17   | 13 | 0,0086 | 0,0117 | 0,0098 | 0,00232 | 0,00735 |
| 1995 | 1151 | 447 | 425825 4519393 | -3463 | -12,5 | -7,5  | 17 | 0,0087 | 0,0127 | 0,0096 | 0,00142 | 0,00542 |

|      |      |     |                |       |       |       |    |        |        |        |         |         |
|------|------|-----|----------------|-------|-------|-------|----|--------|--------|--------|---------|---------|
| 1976 | 1328 | 315 | 426225 4519723 | -3131 | -9,1  | -18,4 | 21 | 0,0089 | 0,0131 | 0,0081 | 0,00103 | 0,00506 |
| 911  | 1767 | 511 | 425943 4519209 | -2975 | -11,5 | 11,1  | 37 | 0,0087 | 0,0117 | 0,0108 | 0,00277 | 0,00649 |
| 1883 | 1884 | 248 | 426355 4519622 | -3206 | 10,7  | -15,4 | 13 | 0,009  | 0,0132 | 0,0081 | 0,00108 | 0,00469 |
| 1286 | 1577 | 432 | 425535 4519480 | -3228 | 12    | 15,9  | 22 | 0,0092 | 0,0119 | 0,0097 | 0,00229 | 0,00556 |
| 1864 | 1039 | 236 | 426034 4519290 | -2145 | 3     | -4,9  | 14 | 0,0076 | 0,0109 | 0,0118 | 0,00308 | 0,00905 |
| 1342 | 1365 | 455 | 425524 4519787 | -3298 | -17,4 | 19,7  | 29 | 0,0092 | 0,0124 | 0,0083 | 0,00164 | 0,00516 |
| 1900 | 1324 | 200 | 425625 4519015 | -2185 | -12,7 | 9,9   | 27 | 0,0079 | 0,0105 | 0,0136 | 0,00393 | 0,00867 |
| 899  | 1611 | 434 | 426427 4519542 | -2676 | -17,1 | 13,1  | 11 | 0,0088 | 0,0118 | 0,0083 | 0,00204 | 0,00655 |
| 1976 | 1274 | 380 | 426001 4519590 | -3450 | -17,6 | 19,5  | 38 | 0,0086 | 0,0129 | 0,0083 | 0,00098 | 0,00454 |
| 809  | 1060 | 419 | 426201 4519974 | -2154 | 5,8   | -5,5  | 18 | 0,0088 | 0,0106 | 0,0084 | 0,00255 | 0,00612 |
| 1926 | 1407 | 302 | 425901 4519800 | -3187 | -14,7 | 13,2  | 24 | 0,009  | 0,0126 | 0,0081 | 0,00108 | 0,00462 |
| 896  | 857  | 215 | 426417 4519404 | -4417 | -6,9  | -18,5 | 23 | 0,0089 | 0,011  | 0,0027 | 0,00206 | 0,00972 |
| 1391 | 1618 | 428 | 426343 4519539 | -3469 | -9,4  | 8,6   | 17 | 0,0084 | 0,0128 | 0,0077 | 0,00092 | 0,00413 |
| 1198 | 1983 | 262 | 426218 4519681 | -2656 | 15    | 4,8   | 17 | 0,0087 | 0,0116 | 0,0082 | 0,00206 | 0,00539 |
| 1661 | 1977 | 253 | 426141 4519099 | -2895 | 1,7   | 16,3  | 31 | 0,0081 | 0,0116 | 0,0107 | 0,00207 | 0,00567 |
| 873  | 1768 | 505 | 425883 4519093 | -2872 | 4     | -7,4  | 36 | 0,0083 | 0,0108 | 0,0116 | 0,00307 | 0,006   |
| 932  | 1004 | 178 | 426121 4519228 | -4327 | 9,3   | -13,3 | 37 | 0,0088 | 0,011  | 0,0028 | 0,00198 | 0,00951 |
| 1647 | 1617 | 359 | 426148 4519984 | -3608 | -18,7 | -7,6  | 38 | 0,0088 | 0,0131 | 0,0068 | 0,00063 | 0,00343 |
| 1145 | 1951 | 267 | 426007 4519943 | -2674 | 3,3   | -4,5  | 12 | 0,009  | 0,0116 | 0,0078 | 0,00183 | 0,00459 |
| 885  | 1026 | 228 | 425553 4519451 | -4478 | 3,9   | -19,9 | 39 | 0,0087 | 0,0109 | 0,0028 | 0,00195 | 0,00947 |
| 1519 | 1972 | 401 | 426092 4519623 | -3898 | -6,7  | -0,5  | 25 | 0,0084 | 0,0129 | 0,0071 | 0,00068 | 0,00346 |

|      |      |     |                |       |       |       |    |        |        |        |         |         |
|------|------|-----|----------------|-------|-------|-------|----|--------|--------|--------|---------|---------|
| 864  | 1175 | 353 | 425856 4519949 | -2164 | 6,4   | -18,6 | 22 | 0,0081 | 0,0105 | 0,0086 | 0,00289 | 0,00527 |
| 1143 | 1889 | 362 | 426308 4519227 | -2917 | 5,8   | 10,6  | 27 | 0,008  | 0,0115 | 0,0094 | 0,00189 | 0,00546 |
| 1773 | 1562 | 152 | 426230 4519441 | -2055 | 16    | -4,3  | 13 | 0,0075 | 0,0103 | 0,0099 | 0,0029  | 0,00692 |
| 1410 | 1250 | 447 | 425778 4519633 | -3135 | 11,2  | 17,8  | 12 | 0,0084 | 0,0114 | 0,009  | 0,00172 | 0,00473 |
| 866  | 826  | 257 | 425830 4519510 | -4329 | -19,3 | -18,7 | 23 | 0,0086 | 0,0107 | 0,0028 | 0,00189 | 0,00913 |
| 1401 | 1648 | 472 | 426439 4519040 | -3566 | 0,9   | 17,3  | 31 | 0,0075 | 0,0121 | 0,0092 | 0,00107 | 0,00416 |
| 943  | 1043 | 198 | 425539 4519273 | -4296 | -13,8 | 13,7  | 31 | 0,0085 | 0,0107 | 0,0028 | 0,00185 | 0,00901 |
| 1797 | 1327 | 470 | 425810 4519054 | -3625 | -6,8  | 17,2  | 19 | 0,008  | 0,0113 | 0,0102 | 0,00145 | 0,00422 |
| 1908 | 1995 | 422 | 426352 4519368 | -4230 | -4,7  | -0,3  | 11 | 0,0077 | 0,0128 | 0,007  | 0,00048 | 0,00253 |
| 868  | 966  | 208 | 425720 4519647 | -4254 | -19,6 | 2,9   | 33 | 0,0084 | 0,0106 | 0,0028 | 0,00186 | 0,00897 |
| 1579 | 1817 | 237 | 425937 4519604 | -2801 | -17,2 | 0,5   | 38 | 0,0084 | 0,0111 | 0,0085 | 0,00167 | 0,00487 |
| 1634 | 1114 | 471 | 426250 4519829 | -3392 | 8     | -13,6 | 32 | 0,0083 | 0,0123 | 0,0074 | 0,00075 | 0,00367 |
| 923  | 1914 | 460 | 426489 4519402 | -3131 | 12    | 18    | 15 | 0,0079 | 0,0118 | 0,0078 | 0,00122 | 0,00428 |
| 1641 | 1207 | 318 | 426435 4519386 | -2669 | -19,2 | -3,2  | 35 | 0,0077 | 0,011  | 0,0087 | 0,0014  | 0,00593 |
| 1488 | 1702 | 298 | 426199 4519703 | -3056 | -10   | 19,5  | 16 | 0,0083 | 0,0117 | 0,0076 | 0,00105 | 0,00393 |
| 1023 | 1638 | 442 | 425878 4519365 | -2937 | 4,8   | -0,2  | 18 | 0,008  | 0,0106 | 0,0097 | 0,00219 | 0,00481 |
| 1647 | 959  | 170 | 426203 4519054 | -4472 | 11,1  | -18,3 | 26 | 0,0083 | 0,0103 | 0,0028 | 0,0018  | 0,00866 |
| 1309 | 1110 | 252 | 425571 4519779 | -2129 | 11,9  | 19,2  | 23 | 0,0072 | 0,0101 | 0,0094 | 0,00332 | 0,00507 |
| 1495 | 1339 | 269 | 425858 4519927 | -2591 | 8,8   | 7     | 10 | 0,0081 | 0,0107 | 0,0084 | 0,00184 | 0,00459 |
| 1620 | 1061 | 313 | 426314 4519114 | -2431 | 12,5  | -17,2 | 38 | 0,0069 | 0,01   | 0,0108 | 0,00226 | 0,00687 |
| 818  | 1764 | 339 | 425957 4519768 | -2456 | 14,5  | -10,9 | 34 | 0,008  | 0,0102 | 0,0083 | 0,00239 | 0,00464 |

|      |      |     |                |       |       |       |    |        |        |        |         |         |
|------|------|-----|----------------|-------|-------|-------|----|--------|--------|--------|---------|---------|
| 1782 | 1800 | 350 | 426193 4519023 | -3618 | 11,6  | 1,2   | 33 | 0,0074 | 0,0113 | 0,0095 | 0,0011  | 0,00368 |
| 1809 | 1219 | 509 | 426104 4519218 | -3726 | -8,1  | 14,6  | 19 | 0,0073 | 0,0115 | 0,0087 | 0,00082 | 0,00348 |
| 1442 | 997  | 484 | 425890 4519790 | -3027 | -15,2 | -0,7  | 20 | 0,008  | 0,0109 | 0,0082 | 0,00127 | 0,00406 |
| 1395 | 1010 | 164 | 425871 4519306 | -4275 | -12,3 | -5    | 10 | 0,0081 | 0,01   | 0,0029 | 0,00171 | 0,00823 |
| 1547 | 921  | 341 | 426486 4519834 | -2491 | 16,7  | -7,1  | 37 | 0,0077 | 0,0103 | 0,008  | 0,0014  | 0,00465 |
| 824  | 1081 | 154 | 426356 4519002 | -3519 | 4     | 10,4  | 25 | 0,0083 | 0,01   | 0,0028 | 0,00163 | 0,00793 |
| 1127 | 1234 | 193 | 426199 4519332 | -4423 | -12,3 | -8,2  | 21 | 0,0081 | 0,0099 | 0,0028 | 0,00173 | 0,00828 |
| 1566 | 999  | 179 | 425921 4519043 | -4375 | -7,2  | -3,3  | 31 | 0,0081 | 0,01   | 0,0029 | 0,00168 | 0,00814 |
| 1653 | 1976 | 302 | 426226 4519056 | -3393 | -12,6 | 6,6   | 31 | 0,0072 | 0,0112 | 0,0089 | 0,00105 | 0,0036  |
| 1647 | 1089 | 506 | 425727 4519691 | -3532 | -19,2 | 0,5   | 27 | 0,0078 | 0,0112 | 0,0078 | 0,00092 | 0,00349 |
| 1863 | 1150 | 451 | 425717 4519130 | -3416 | -19,1 | -4,6  | 33 | 0,0076 | 0,0104 | 0,0101 | 0,00147 | 0,00395 |
| 1062 | 1023 | 204 | 426182 4519518 | -4261 | -18,4 | 14,6  | 36 | 0,0081 | 0,0099 | 0,0029 | 0,00171 | 0,00811 |
| 1760 | 1795 | 407 | 425557 4519080 | -3975 | 8,3   | 4     | 40 | 0,0079 | 0,0105 | 0,0089 | 0,00129 | 0,0031  |
| 844  | 1916 | 176 | 425631 4519275 | -4374 | 15,4  | -17,9 | 15 | 0,008  | 0,01   | 0,0029 | 0,00164 | 0,00812 |
| 1724 | 1270 | 388 | 425586 4519890 | -3504 | -6,1  | 15,2  | 14 | 0,0079 | 0,0113 | 0,0071 | 0,00081 | 0,00338 |
| 1666 | 1046 | 372 | 426278 4519799 | -2885 | 16,1  | 5,8   | 18 | 0,0076 | 0,0109 | 0,0082 | 0,00117 | 0,00394 |
| 1753 | 1218 | 342 | 426133 4519231 | -2873 | -15,7 | -19,4 | 20 | 0,0071 | 0,0103 | 0,0098 | 0,0015  | 0,00494 |
| 1814 | 1480 | 270 | 426459 4519237 | -2867 | -14,6 | 2,2   | 13 | 0,0071 | 0,0108 | 0,0086 | 0,00103 | 0,0043  |
| 1222 | 1597 | 305 | 426401 4519812 | -2732 | 6,7   | 10,6  | 17 | 0,008  | 0,0107 | 0,0073 | 0,00121 | 0,00375 |
| 850  | 870  | 163 | 426299 4519657 | -3392 | 19,9  | -16,2 | 19 | 0,008  | 0,0098 | 0,0029 | 0,0016  | 0,00775 |
| 827  | 2000 | 194 | 425705 4519475 | -4468 | 13,4  | -15,7 | 37 | 0,0078 | 0,0098 | 0,0029 | 0,00162 | 0,00801 |

|      |      |     |                |       |       |       |    |        |        |        |         |         |
|------|------|-----|----------------|-------|-------|-------|----|--------|--------|--------|---------|---------|
| 1741 | 1447 | 438 | 426091 4519008 | -3615 | 17,9  | 0,2   | 28 | 0,0073 | 0,0105 | 0,0099 | 0,00123 | 0,00347 |
| 1575 | 999  | 164 | 426055 4519867 | -4337 | -6,1  | 1,1   | 32 | 0,0078 | 0,0096 | 0,0029 | 0,00168 | 0,00795 |
| 1461 | 1138 | 354 | 426242 4519246 | -2589 | 9,1   | 18,1  | 28 | 0,0067 | 0,0097 | 0,0101 | 0,0019  | 0,00539 |
| 890  | 808  | 386 | 425770 4519721 | -4375 | -16,7 | -10,5 | 14 | 0,0077 | 0,0096 | 0,0029 | 0,00159 | 0,00775 |
| 977  | 1057 | 172 | 426039 4519159 | -3747 | 9,6   | 8     | 14 | 0,0079 | 0,0097 | 0,0029 | 0,0015  | 0,00742 |
| 991  | 1918 | 171 | 426351 4519040 | -4429 | 19,5  | -17,5 | 14 | 0,0078 | 0,0095 | 0,0029 | 0,00159 | 0,00773 |
| 1081 | 935  | 202 | 425774 4519298 | -3987 | -19,9 | -12,3 | 36 | 0,0078 | 0,0097 | 0,003  | 0,00152 | 0,00746 |
| 1227 | 1329 | 206 | 425524 4519369 | -4422 | -3,2  | -11,3 | 34 | 0,0077 | 0,0096 | 0,003  | 0,00156 | 0,00766 |
| 1035 | 1659 | 430 | 426379 4519174 | -2941 | -9,2  | 14    | 26 | 0,007  | 0,0102 | 0,0088 | 0,00137 | 0,00417 |
| 1589 | 1164 | 498 | 425507 4519526 | -3596 | 5,9   | -19,6 | 39 | 0,0075 | 0,0103 | 0,0079 | 0,00113 | 0,00326 |
| 1511 | 1481 | 246 | 425810 4519686 | -2598 | 2     | 10,7  | 20 | 0,0074 | 0,0097 | 0,0085 | 0,00177 | 0,00404 |
| 1230 | 1774 | 155 | 425617 4519030 | -4346 | 11,1  | -6,9  | 14 | 0,0076 | 0,0096 | 0,003  | 0,00148 | 0,00746 |
| 827  | 1317 | 195 | 426059 4519613 | -4054 | -17,6 | 15,4  | 11 | 0,0077 | 0,0094 | 0,0029 | 0,00153 | 0,00739 |
| 1787 | 1844 | 336 | 426414 4519030 | -3718 | -19,8 | -0,2  | 38 | 0,0066 | 0,0111 | 0,0079 | 0,00066 | 0,0026  |
| 1721 | 1362 | 308 | 426378 4519086 | -2830 | -9,2  | -19,6 | 25 | 0,0066 | 0,01   | 0,0096 | 0,00122 | 0,00435 |
| 831  | 1040 | 183 | 426458 4519030 | -3469 | 15,7  | 12,3  | 11 | 0,0079 | 0,0093 | 0,0029 | 0,00146 | 0,00704 |
| 925  | 1262 | 256 | 425686 4519057 | -4258 | 14,4  | 15,7  | 19 | 0,0077 | 0,0095 | 0,003  | 0,00144 | 0,00725 |
| 1300 | 1955 | 432 | 425727 4519266 | -3789 | -2,2  | 17,8  | 24 | 0,0073 | 0,0103 | 0,0079 | 0,00102 | 0,00289 |
| 1375 | 1333 | 534 | 425719 4519401 | -3631 | -2,7  | 7,7   | 22 | 0,0073 | 0,0103 | 0,0082 | 0,00106 | 0,00311 |
| 1794 | 1994 | 395 | 425579 4519225 | -4176 | 16,8  | 17,6  | 21 | 0,0074 | 0,0102 | 0,0077 | 0,00105 | 0,0025  |
| 1076 | 1102 | 242 | 426229 4519763 | -4341 | -2,4  | 1,1   | 21 | 0,0076 | 0,0092 | 0,0029 | 0,00157 | 0,00744 |

|      |      |     |                |       |       |       |    |        |        |        |         |         |
|------|------|-----|----------------|-------|-------|-------|----|--------|--------|--------|---------|---------|
| 1068 | 1869 | 189 | 426362 4519886 | -2157 | 6,6   | 3,3   | 30 | 0,0077 | 0,0089 | 0,0068 | 0,00166 | 0,00387 |
| 1486 | 809  | 311 | 426034 4519394 | -2146 | 11    | 10,5  | 17 | 0,0063 | 0,0087 | 0,0096 | 0,0023  | 0,00521 |
| 1794 | 1170 | 521 | 426277 4519953 | -3974 | 8,3   | -18,7 | 33 | 0,0074 | 0,0114 | 0,0061 | 0,00026 | 0,00206 |
| 1859 | 1665 | 352 | 426483 4519374 | -3823 | -11,5 | -1,5  | 23 | 0,0069 | 0,0111 | 0,0068 | 0,00042 | 0,0021  |
| 1165 | 866  | 242 | 425535 4519270 | -4034 | -5,1  | -15,3 | 29 | 0,0074 | 0,0094 | 0,0031 | 0,0014  | 0,00693 |
| 1263 | 1619 | 212 | 426063 4519613 | -2306 | 4,9   | 17,3  | 15 | 0,0069 | 0,009  | 0,008  | 0,00191 | 0,00425 |
| 1986 | 1866 | 150 | 425624 4519175 | -2368 | 1,2   | -9,6  | 14 | 0,0071 | 0,0087 | 0,0109 | 0,00256 | 0,0041  |
| 1058 | 1931 | 401 | 426406 4519774 | -3417 | -19   | 18,5  | 37 | 0,0075 | 0,011  | 0,0062 | 0,00054 | 0,00224 |
| 1423 | 951  | 158 | 425684 4519673 | -3965 | -10,6 | 9,2   | 29 | 0,0074 | 0,0093 | 0,003  | 0,00145 | 0,00704 |
| 1672 | 884  | 264 | 426231 4519151 | -4484 | -3,7  | 14,9  | 24 | 0,0075 | 0,009  | 0,0029 | 0,00151 | 0,00716 |
| 1018 | 1362 | 189 | 425869 4519672 | -4187 | -17,7 | 10,4  | 27 | 0,0074 | 0,0092 | 0,003  | 0,00146 | 0,0071  |
| 1002 | 1690 | 233 | 425865 4519368 | -4489 | -1,8  | 5,6   | 23 | 0,0074 | 0,0091 | 0,003  | 0,00145 | 0,00717 |
| 1611 | 904  | 187 | 425869 4519132 | -4129 | -2,6  | -7    | 24 | 0,0075 | 0,0092 | 0,003  | 0,00142 | 0,00689 |
| 1066 | 1720 | 528 | 426111 4519609 | -3681 | -3,6  | 13    | 19 | 0,0072 | 0,0107 | 0,0068 | 0,0006  | 0,00252 |
| 895  | 1227 | 234 | 425648 4519662 | -4133 | -16,1 | -17   | 27 | 0,0073 | 0,0092 | 0,003  | 0,00141 | 0,00697 |
| 1751 | 1354 | 261 | 425938 4519421 | -2701 | 5,5   | -9,7  | 12 | 0,0068 | 0,0093 | 0,0092 | 0,00161 | 0,00387 |
| 929  | 1022 | 262 | 425885 4519300 | -4069 | -10,2 | 12,7  | 13 | 0,0074 | 0,0091 | 0,003  | 0,00139 | 0,00683 |
| 1211 | 815  | 309 | 426131 4519551 | -4310 | 8,3   | 0,4   | 40 | 0,0074 | 0,009  | 0,003  | 0,00146 | 0,00701 |
| 1889 | 1506 | 413 | 425980 4519314 | -3919 | 10,6  | -13,3 | 21 | 0,0069 | 0,0104 | 0,0077 | 0,00065 | 0,00249 |
| 1804 | 1584 | 473 | 425795 4519210 | -4088 | -12   | 16    | 26 | 0,0067 | 0,0105 | 0,0077 | 0,00063 | 0,00221 |
| 1163 | 889  | 481 | 425685 4519299 | -2519 | -15,3 | -8,5  | 33 | 0,0065 | 0,0085 | 0,0101 | 0,00249 | 0,00439 |

|      |      |     |                |       |       |       |    |        |        |        |         |         |
|------|------|-----|----------------|-------|-------|-------|----|--------|--------|--------|---------|---------|
| 912  | 1747 | 315 | 425775 4519380 | -2480 | -6,4  | 6,2   | 19 | 0,0068 | 0,0087 | 0,0089 | 0,00238 | 0,00388 |
| 881  | 1352 | 521 | 425713 4519938 | -3042 | 19,4  | 15,1  | 13 | 0,0073 | 0,0099 | 0,0071 | 0,00113 | 0,00301 |
| 1266 | 1689 | 170 | 426373 4519091 | -4353 | 10,2  | 18,6  | 17 | 0,0074 | 0,0089 | 0,0029 | 0,00142 | 0,00685 |
| 1588 | 806  | 166 | 426080 4519869 | -3916 | -17,1 | -4,4  | 19 | 0,0073 | 0,0088 | 0,003  | 0,00145 | 0,00681 |
| 1556 | 1848 | 400 | 426094 4519521 | -3947 | -11,6 | 15,4  | 20 | 0,0068 | 0,0107 | 0,0066 | 0,00039 | 0,00204 |
| 1804 | 1953 | 261 | 426261 4519034 | -3311 | 1,6   | -13,2 | 13 | 0,0065 | 0,01   | 0,0087 | 0,00084 | 0,0027  |
| 1165 | 1923 | 350 | 426317 4519188 | -3091 | -16,1 | 5,4   | 31 | 0,0067 | 0,0098 | 0,0081 | 0,00105 | 0,00305 |
| 1191 | 895  | 483 | 425880 4519250 | -2546 | -10,7 | 13,9  | 15 | 0,0064 | 0,0084 | 0,0099 | 0,00211 | 0,00448 |
| 1226 | 1940 | 301 | 425662 4519971 | -3303 | -3,6  | 18,1  | 33 | 0,0073 | 0,0102 | 0,0062 | 0,00068 | 0,00261 |
| 800  | 1341 | 152 | 426092 4519694 | -3370 | 0     | -6,1  | 21 | 0,0072 | 0,0088 | 0,003  | 0,00128 | 0,00649 |
| 1015 | 890  | 499 | 425588 4519895 | -2581 | 13,3  | -3,7  | 18 | 0,0068 | 0,009  | 0,0079 | 0,00177 | 0,00335 |
| 1033 | 944  | 494 | 426072 4519710 | -2580 | 10,7  | 18,9  | 15 | 0,0067 | 0,0088 | 0,008  | 0,00154 | 0,00357 |
| 1230 | 930  | 311 | 426065 4519401 | -4346 | 7,3   | -12,8 | 17 | 0,0072 | 0,0087 | 0,003  | 0,00135 | 0,00658 |
| 1850 | 1813 | 419 | 425848 4519237 | -4148 | -9,6  | -9,5  | 12 | 0,0064 | 0,0103 | 0,0074 | 0,00052 | 0,00187 |
| 1527 | 1384 | 250 | 425563 4519846 | -2692 | -10,9 | -5,3  | 30 | 0,007  | 0,0091 | 0,0076 | 0,0013  | 0,00313 |
| 1256 | 1694 | 399 | 426330 4519916 | -3590 | 15,9  | -13,5 | 30 | 0,0072 | 0,0106 | 0,0063 | 0,00038 | 0,00187 |
| 1080 | 839  | 396 | 425597 4519970 | -2322 | 5,5   | -6,7  | 32 | 0,0066 | 0,0089 | 0,0078 | 0,00185 | 0,00328 |
| 1759 | 1474 | 334 | 426411 4519481 | -3452 | 17    | -13,9 | 36 | 0,0066 | 0,0102 | 0,0072 | 0,0005  | 0,00231 |
| 1774 | 1817 | 539 | 425738 4519006 | -4380 | -9,1  | 15,2  | 15 | 0,0063 | 0,0101 | 0,0076 | 0,00062 | 0,00159 |
| 939  | 1321 | 197 | 426389 4519376 | -3967 | -10,7 | 12,6  | 36 | 0,0073 | 0,0085 | 0,003  | 0,00136 | 0,00637 |
| 923  | 864  | 329 | 426062 4519710 | -4093 | 0,7   | 3,8   | 14 | 0,0071 | 0,0086 | 0,003  | 0,00133 | 0,00645 |

|      |      |     |                |       |       |       |    |        |        |        |         |         |
|------|------|-----|----------------|-------|-------|-------|----|--------|--------|--------|---------|---------|
| 1657 | 1180 | 463 | 426433 4519230 | -3477 | -11,6 | 6,1   | 35 | 0,0062 | 0,0101 | 0,0077 | 0,00052 | 0,00233 |
| 1357 | 967  | 198 | 425932 4519410 | -3996 | 9,2   | 8,4   | 17 | 0,0071 | 0,0087 | 0,0031 | 0,00129 | 0,00629 |
| 1398 | 1759 | 171 | 425800 4519600 | -2309 | -15,6 | 17,6  | 36 | 0,0067 | 0,0084 | 0,0077 | 0,00173 | 0,0035  |
| 1252 | 1267 | 183 | 425886 4519110 | -4055 | -7,5  | -11,7 | 28 | 0,0071 | 0,0087 | 0,0031 | 0,00125 | 0,00622 |
| 1500 | 1000 | 300 | 426100 4519300 | -4500 | 5     | 5     | 14 | 0,007  | 0,0086 | 0,003  | 0,00134 | 0,00649 |
| 1815 | 1486 | 371 | 426057 4519958 | -3887 | -12,3 | 3,4   | 39 | 0,0069 | 0,0107 | 0,006  | 0,00022 | 0,00172 |
| 1741 | 1878 | 287 | 425797 4519125 | -3466 | -12,7 | 4,8   | 32 | 0,0067 | 0,0093 | 0,0084 | 0,00093 | 0,0025  |
| 1333 | 1820 | 379 | 426205 4519550 | -3606 | -11,9 | -0,8  | 10 | 0,0067 | 0,0102 | 0,0067 | 0,00047 | 0,00206 |
| 897  | 1376 | 512 | 426009 4519330 | -2839 | 7,5   | 10,6  | 32 | 0,0065 | 0,0087 | 0,0089 | 0,00162 | 0,00343 |
| 962  | 1351 | 282 | 426282 4519972 | -4401 | 2,7   | -4,9  | 28 | 0,0069 | 0,0085 | 0,003  | 0,0014  | 0,00664 |
| 916  | 1299 | 437 | 426016 4519083 | -2526 | -18,5 | 16,3  | 33 | 0,0062 | 0,008  | 0,0099 | 0,00206 | 0,0044  |
| 1592 | 1229 | 437 | 426379 4519360 | -3376 | 12    | 9,4   | 27 | 0,0064 | 0,0098 | 0,0078 | 0,00061 | 0,00246 |
| 1434 | 1453 | 527 | 425854 4519953 | -4033 | -6,6  | -18,7 | 30 | 0,0067 | 0,0105 | 0,006  | 0,00032 | 0,00189 |
| 1578 | 950  | 549 | 426434 4519581 | -3416 | 0,4   | 13,4  | 22 | 0,0065 | 0,0101 | 0,0071 | 0,00044 | 0,0021  |
| 1278 | 1084 | 251 | 425891 4519595 | -4279 | 14,8  | 0,5   | 35 | 0,0069 | 0,0085 | 0,0031 | 0,00128 | 0,00626 |
| 1989 | 1724 | 204 | 425516 4519682 | -3119 | -0,9  | -13   | 39 | 0,0069 | 0,0093 | 0,0072 | 0,00084 | 0,00258 |
| 801  | 1065 | 455 | 426437 4519321 | -4390 | 17,9  | -3,7  | 12 | 0,007  | 0,0083 | 0,003  | 0,00133 | 0,00628 |
| 1849 | 1604 | 150 | 425612 4519189 | -4350 | 5,6   | -7,1  | 32 | 0,0068 | 0,0086 | 0,0032 | 0,00125 | 0,0062  |
| 1950 | 1370 | 518 | 426309 4519329 | -4182 | -2,9  | 5,5   | 16 | 0,0061 | 0,0104 | 0,0068 | 0,00027 | 0,00147 |
| 1475 | 1678 | 203 | 426154 4519080 | -2385 | 14,1  | -15,7 | 32 | 0,006  | 0,0081 | 0,0098 | 0,00194 | 0,00394 |
| 1271 | 1720 | 244 | 425880 4519830 | -2693 | -14,8 | 8,6   | 22 | 0,007  | 0,0089 | 0,0071 | 0,0011  | 0,00265 |



|      |      |     |                |       |       |       |    |        |        |        |         |         |
|------|------|-----|----------------|-------|-------|-------|----|--------|--------|--------|---------|---------|
| 1187 | 1745 | 408 | 425536 4519335 | -3438 | -1,6  | -14   | 15 | 0,0068 | 0,0089 | 0,008  | 0,00111 | 0,00247 |
| 1136 | 1662 | 429 | 426059 4519037 | -3134 | -8,3  | -3,9  | 21 | 0,0064 | 0,0088 | 0,0093 | 0,00129 | 0,00286 |
| 822  | 827  | 365 | 426339 4519598 | -3949 | 0,5   | -16,9 | 19 | 0,007  | 0,0082 | 0,003  | 0,00128 | 0,00604 |
| 1810 | 926  | 249 | 425523 4519607 | -4342 | 9,6   | -17,5 | 38 | 0,0066 | 0,0085 | 0,0032 | 0,00128 | 0,00608 |
| 1290 | 1861 | 366 | 425557 4519369 | -3537 | -6,9  | -0,2  | 13 | 0,0067 | 0,0091 | 0,0075 | 0,00095 | 0,00233 |
| 1700 | 1795 | 217 | 426163 4519411 | -2839 | -6,7  | 10,9  | 38 | 0,0064 | 0,009  | 0,0078 | 0,00089 | 0,00266 |
| 1406 | 1132 | 338 | 425977 4519834 | -2734 | 2     | -10,3 | 39 | 0,0067 | 0,0089 | 0,0075 | 0,00102 | 0,00266 |
| 1829 | 1367 | 389 | 426029 4519680 | -3767 | -19,3 | -5,4  | 30 | 0,0064 | 0,01   | 0,0065 | 0,00031 | 0,00178 |
| 1031 | 868  | 383 | 426318 4519675 | -2235 | 13,5  | 3,1   | 38 | 0,0064 | 0,0076 | 0,0072 | 0,00129 | 0,00369 |
| 809  | 875  | 363 | 425630 4519066 | -3712 | -13   | 17,3  | 24 | 0,0069 | 0,0085 | 0,0033 | 0,00106 | 0,00561 |
| 899  | 865  | 270 | 425913 4519008 | -3333 | 9,8   | -9    | 28 | 0,007  | 0,0084 | 0,0032 | 0,00101 | 0,00548 |
| 1139 | 1632 | 188 | 426093 4519682 | -4264 | -18,7 | 1,6   | 27 | 0,0068 | 0,0082 | 0,003  | 0,00127 | 0,00612 |
| 1410 | 1236 | 154 | 425683 4519594 | -3850 | 19,5  | 14,3  | 18 | 0,0066 | 0,0084 | 0,0032 | 0,00116 | 0,00583 |
| 1017 | 1005 | 448 | 426122 4519007 | -2387 | 7,9   | 0,3   | 22 | 0,0059 | 0,0076 | 0,0102 | 0,00194 | 0,00441 |
| 887  | 935  | 502 | 426382 4519580 | -4438 | 3,5   | -13,6 | 13 | 0,0068 | 0,0081 | 0,003  | 0,00129 | 0,00609 |
| 1986 | 1605 | 248 | 426307 4519323 | -3209 | -13,6 | 7,8   | 15 | 0,0062 | 0,0095 | 0,0074 | 0,00049 | 0,00209 |
| 1303 | 1084 | 223 | 425943 4519998 | -2155 | 18,2  | 17,2  | 31 | 0,0063 | 0,0081 | 0,0074 | 0,0016  | 0,00263 |
| 1184 | 1354 | 173 | 425653 4519876 | -3982 | 6,1   | 7,4   | 30 | 0,0065 | 0,0084 | 0,0032 | 0,0012  | 0,0059  |
| 1678 | 1016 | 313 | 426015 4519796 | -2684 | -5,5  | -3,1  | 33 | 0,0065 | 0,0087 | 0,0076 | 0,00089 | 0,00269 |
| 912  | 1093 | 383 | 425935 4519045 | -2222 | -14,2 | 7,4   | 23 | 0,0059 | 0,0074 | 0,0097 | 0,00214 | 0,00413 |
| 972  | 1074 | 396 | 425734 4519451 | -2400 | -10,3 | 10,4  | 31 | 0,006  | 0,0078 | 0,0086 | 0,00198 | 0,00324 |

|      |      |     |                |       |       |       |    |        |        |        |         |         |
|------|------|-----|----------------|-------|-------|-------|----|--------|--------|--------|---------|---------|
| 843  | 981  | 312 | 425632 4519106 | -3668 | 14,5  | -13,1 | 39 | 0,0068 | 0,0084 | 0,0033 | 0,00103 | 0,0055  |
| 1426 | 1055 | 452 | 425677 4519562 | -3091 | -8,4  | 12,4  | 14 | 0,0065 | 0,0087 | 0,008  | 0,00107 | 0,00255 |
| 1822 | 1211 | 523 | 425652 4519479 | -4054 | 5,9   | -11,6 | 15 | 0,0062 | 0,0094 | 0,0068 | 0,00058 | 0,00193 |
| 1619 | 917  | 170 | 425813 4519522 | -3735 | 19,5  | 2,1   | 13 | 0,0066 | 0,0083 | 0,0032 | 0,00113 | 0,00566 |
| 1124 | 1349 | 231 | 425837 4519458 | -4180 | 7,1   | 15,4  | 15 | 0,0066 | 0,0082 | 0,0032 | 0,00116 | 0,00576 |
| 1528 | 1086 | 163 | 426188 4519792 | -4000 | 1,6   | -13,1 | 27 | 0,0067 | 0,008  | 0,0031 | 0,00125 | 0,00586 |
| 1306 | 1701 | 418 | 425612 4519938 | -3895 | 10,7  | -18,8 | 36 | 0,0064 | 0,0097 | 0,0059 | 0,00045 | 0,00207 |
| 1704 | 1180 | 317 | 425656 4519070 | -2800 | -17   | 15    | 40 | 0,0063 | 0,0077 | 0,0101 | 0,00166 | 0,0031  |
| 1701 | 1184 | 522 | 426025 4519808 | -3959 | -6,3  | -18,5 | 36 | 0,0063 | 0,01   | 0,0061 | 0,00024 | 0,0016  |
| 1797 | 1221 | 432 | 426048 4519855 | -3806 | 17,1  | 14,8  | 27 | 0,0064 | 0,0098 | 0,0064 | 0,00033 | 0,00183 |
| 1717 | 1354 | 178 | 425590 4519153 | -4222 | 9,3   | -17   | 24 | 0,0065 | 0,0083 | 0,0033 | 0,00113 | 0,00561 |
| 1500 | 1088 | 264 | 426497 4519124 | -4345 | -0,4  | -5    | 12 | 0,0068 | 0,0079 | 0,003  | 0,00126 | 0,00575 |
| 1376 | 1553 | 171 | 425954 4519897 | -4274 | -19,2 | 18,6  | 26 | 0,0065 | 0,008  | 0,0031 | 0,00124 | 0,00594 |
| 1677 | 958  | 415 | 426060 4519801 | -3100 | 1     | -6,6  | 32 | 0,0065 | 0,0092 | 0,0071 | 0,00056 | 0,00216 |
| 1446 | 1242 | 531 | 426237 4519991 | -3886 | -2,8  | 1,5   | 22 | 0,0066 | 0,0101 | 0,0059 | 0,0002  | 0,0014  |
| 1880 | 1772 | 186 | 426317 4519623 | -2798 | -8,2  | 17,5  | 28 | 0,0065 | 0,0091 | 0,007  | 0,00059 | 0,00207 |
| 1788 | 1779 | 504 | 426066 4519288 | -4380 | 12,6  | -4,2  | 34 | 0,0059 | 0,0096 | 0,0067 | 0,00037 | 0,00136 |
| 883  | 1251 | 194 | 426277 4519152 | -3392 | -11,6 | 12,7  | 11 | 0,0069 | 0,008  | 0,0031 | 0,00105 | 0,00529 |
| 1392 | 1807 | 341 | 426019 4519042 | -3289 | 11,7  | -2,3  | 13 | 0,0062 | 0,0085 | 0,0088 | 0,00104 | 0,00226 |
| 1484 | 1467 | 191 | 425970 4519270 | -2267 | -8,6  | 13,5  | 20 | 0,0059 | 0,0075 | 0,0086 | 0,00158 | 0,00356 |
| 1011 | 1259 | 374 | 426208 4519509 | -4466 | -6,6  | 7     | 12 | 0,0065 | 0,0078 | 0,0031 | 0,0012  | 0,00577 |

|      |      |     |                |       |       |       |    |        |        |        |         |         |
|------|------|-----|----------------|-------|-------|-------|----|--------|--------|--------|---------|---------|
| 1507 | 1269 | 155 | 425730 4519333 | -3871 | 13,7  | -2,5  | 37 | 0,0065 | 0,0081 | 0,0033 | 0,00107 | 0,00542 |
| 807  | 1779 | 337 | 425899 4519036 | -4382 | -15,1 | -2,2  | 30 | 0,0066 | 0,0079 | 0,0032 | 0,00108 | 0,00558 |
| 1612 | 818  | 283 | 425642 4519654 | -4193 | 8,1   | 0     | 19 | 0,0064 | 0,0081 | 0,0033 | 0,00115 | 0,00554 |
| 1832 | 974  | 176 | 425571 4519992 | -4002 | 12,3  | -5,3  | 18 | 0,0062 | 0,0082 | 0,0032 | 0,00118 | 0,00559 |
| 839  | 1539 | 151 | 425787 4519042 | -2940 | 12,3  | 2,3   | 33 | 0,0067 | 0,0081 | 0,0034 | 0,00082 | 0,00492 |
| 946  | 1667 | 212 | 426135 4519929 | -4150 | 12,8  | 2,6   | 25 | 0,0064 | 0,0078 | 0,0031 | 0,00116 | 0,00565 |
| 902  | 894  | 522 | 426496 4519075 | -4294 | 5     | 16,4  | 19 | 0,0067 | 0,0076 | 0,0031 | 0,00116 | 0,00539 |
| 1923 | 825  | 420 | 426404 4519396 | -2950 | 5     | 9,6   | 32 | 0,0057 | 0,0087 | 0,0081 | 0,00056 | 0,00233 |
| 1266 | 1280 | 350 | 425531 4519764 | -2922 | -13,1 | 3,3   | 39 | 0,0063 | 0,0083 | 0,0072 | 0,00102 | 0,00235 |
| 991  | 1691 | 473 | 425697 4519702 | -3528 | 1,9   | -2,8  | 37 | 0,0063 | 0,009  | 0,0065 | 0,00062 | 0,00197 |
| 1763 | 1151 | 524 | 426309 4519831 | -4017 | -8,9  | 6     | 25 | 0,0062 | 0,0098 | 0,0059 | 0,00017 | 0,00112 |
| 1086 | 1592 | 182 | 426322 4519920 | -4093 | 12,1  | -6,6  | 12 | 0,0064 | 0,0076 | 0,0031 | 0,00117 | 0,00558 |
| 1052 | 1668 | 383 | 425844 4519919 | -3275 | 11,6  | 5,2   | 22 | 0,0065 | 0,009  | 0,0062 | 0,00054 | 0,00191 |
| 1098 | 914  | 274 | 426220 4519862 | -3944 | 3,8   | -12,8 | 21 | 0,0064 | 0,0076 | 0,0031 | 0,00114 | 0,00538 |
| 1911 | 1281 | 531 | 425902 4519119 | -4144 | 18,1  | -13,6 | 10 | 0,006  | 0,0087 | 0,0075 | 0,0006  | 0,0016  |
| 903  | 1844 | 279 | 425590 4519283 | -4285 | -2,4  | 15,1  | 12 | 0,0063 | 0,0078 | 0,0033 | 0,00103 | 0,00523 |
| 1303 | 1651 | 361 | 426097 4519557 | -3368 | -17   | 14,3  | 13 | 0,0061 | 0,009  | 0,0067 | 0,00048 | 0,00175 |
| 971  | 1146 | 428 | 426425 4519450 | -4432 | 17,1  | 2     | 17 | 0,0064 | 0,0075 | 0,0031 | 0,00115 | 0,00543 |
| 1013 | 1527 | 331 | 426089 4519438 | -2611 | 10,8  | 5,4   | 26 | 0,006  | 0,0076 | 0,0078 | 0,00131 | 0,00268 |
| 1562 | 995  | 299 | 426087 4519313 | -2489 | -19,9 | 5,1   | 14 | 0,0058 | 0,0073 | 0,0082 | 0,00109 | 0,00346 |
| 1500 | 1523 | 300 | 426100 4519300 | -3000 | -20   | 5     | 36 | 0,0059 | 0,0082 | 0,0078 | 0,00081 | 0,00231 |

|      |      |     |                |       |       |       |    |        |        |        |         |         |
|------|------|-----|----------------|-------|-------|-------|----|--------|--------|--------|---------|---------|
| 1865 | 922  | 302 | 426170 4519269 | -4434 | 8,5   | -3,9  | 15 | 0,0063 | 0,0076 | 0,0032 | 0,00111 | 0,00531 |
| 825  | 1354 | 180 | 425592 4519972 | -3184 | 12,6  | -19,8 | 38 | 0,0061 | 0,0079 | 0,0034 | 0,00093 | 0,00509 |
| 1820 | 1124 | 252 | 425767 4519745 | -4426 | 8,4   | 0,2   | 13 | 0,0061 | 0,0078 | 0,0033 | 0,00112 | 0,00537 |
| 1413 | 972  | 227 | 425901 4519617 | -3960 | 14,7  | 0,3   | 28 | 0,0063 | 0,0077 | 0,0033 | 0,00104 | 0,00514 |
| 1591 | 1285 | 201 | 426450 4519404 | -4277 | 17,6  | -19,1 | 19 | 0,0064 | 0,0075 | 0,0031 | 0,00113 | 0,0053  |
| 1676 | 878  | 213 | 426418 4519061 | -3895 | 7,2   | -0,6  | 25 | 0,0066 | 0,0075 | 0,0031 | 0,00108 | 0,005   |
| 874  | 1492 | 175 | 426499 4519078 | -3320 | 19,6  | -17,7 | 19 | 0,0067 | 0,0074 | 0,0031 | 0,00098 | 0,00483 |
| 1058 | 1170 | 374 | 426108 4519353 | -4358 | 13,4  | -11   | 23 | 0,0063 | 0,0076 | 0,0032 | 0,00105 | 0,00523 |
| 859  | 1050 | 394 | 425864 4519966 | -2384 | 11,3  | 13    | 15 | 0,006  | 0,0077 | 0,007  | 0,00126 | 0,00213 |
| 1371 | 912  | 257 | 425506 4519499 | -2172 | -8,3  | 2,4   | 23 | 0,0055 | 0,0074 | 0,0082 | 0,0018  | 0,00247 |
| 1599 | 1612 | 374 | 426015 4519271 | -3695 | -12,7 | -13,9 | 25 | 0,0057 | 0,0088 | 0,0073 | 0,00045 | 0,00161 |
| 1595 | 1613 | 383 | 425879 4519842 | -3941 | -7,4  | -12,1 | 39 | 0,0059 | 0,0093 | 0,0058 | 0,00023 | 0,00141 |
| 1314 | 1145 | 211 | 425600 4519529 | -3907 | -13   | 1,3   | 34 | 0,0061 | 0,0077 | 0,0033 | 0,00098 | 0,00491 |
| 938  | 1313 | 199 | 425556 4519956 | -3518 | -1,9  | -7,1  | 33 | 0,0059 | 0,0078 | 0,0033 | 0,00095 | 0,00498 |
| 1056 | 1663 | 537 | 426412 4519527 | -3767 | 13,1  | -11,8 | 16 | 0,0059 | 0,0092 | 0,0063 | 0,00028 | 0,00124 |
| 1610 | 1612 | 273 | 426051 4519796 | -3273 | 0,9   | -5,7  | 31 | 0,0061 | 0,0089 | 0,0064 | 0,00037 | 0,00158 |
| 1169 | 1484 | 296 | 426320 4519675 | -2666 | -7    | 13,1  | 19 | 0,0062 | 0,0079 | 0,0068 | 0,00077 | 0,0021  |
| 1116 | 1530 | 509 | 425700 4519880 | -3811 | 6,3   | 7,3   | 34 | 0,006  | 0,009  | 0,0059 | 0,00039 | 0,0017  |
| 825  | 1179 | 300 | 425843 4519576 | -3845 | -14,4 | 16,5  | 39 | 0,0062 | 0,0076 | 0,0033 | 0,00096 | 0,0049  |
| 966  | 1393 | 453 | 426401 4519371 | -2879 | -15,4 | -10,6 | 11 | 0,0058 | 0,008  | 0,0073 | 0,00078 | 0,00227 |
| 978  | 1579 | 470 | 425574 4519528 | -3350 | 15,6  | -16,2 | 25 | 0,0061 | 0,0081 | 0,0072 | 0,00085 | 0,00197 |

|      |      |     |                |       |       |       |    |        |        |        |         |         |
|------|------|-----|----------------|-------|-------|-------|----|--------|--------|--------|---------|---------|
| 1601 | 887  | 196 | 426271 4519281 | -3684 | 18    | 14,1  | 10 | 0,0064 | 0,0074 | 0,0032 | 0,00097 | 0,00479 |
| 1189 | 1470 | 489 | 425845 4519244 | -3480 | 9,1   | 6,6   | 24 | 0,0059 | 0,008  | 0,0078 | 0,00079 | 0,0018  |
| 1035 | 1578 | 312 | 425847 4519715 | -4410 | -8,7  | 18,3  | 38 | 0,006  | 0,0075 | 0,0032 | 0,00103 | 0,00514 |
| 977  | 1803 | 513 | 425576 4519554 | -3798 | 11    | -8,2  | 23 | 0,0059 | 0,0085 | 0,0064 | 0,0006  | 0,00174 |
| 1585 | 1777 | 204 | 426441 4519227 | -2653 | -15,2 | 5,4   | 31 | 0,0058 | 0,0078 | 0,0074 | 0,00075 | 0,00236 |
| 1638 | 1622 | 363 | 426140 4519652 | -3844 | -17,7 | 4,3   | 22 | 0,0058 | 0,0092 | 0,006  | 0,0002  | 0,00117 |
| 1276 | 1282 | 153 | 425670 4519736 | -3491 | -12,2 | -9    | 22 | 0,006  | 0,0076 | 0,0033 | 0,00091 | 0,0048  |
| 1500 | 1000 | 300 | 426100 4519300 | -2477 | -20   | 5     | 36 | 0,0056 | 0,007  | 0,008  | 0,00103 | 0,00315 |
| 1010 | 1829 | 199 | 426334 4519338 | -2175 | -8,6  | -19,4 | 38 | 0,0059 | 0,0067 | 0,0071 | 0,00113 | 0,00309 |
| 853  | 1583 | 381 | 426288 4519018 | -2542 | -1,3  | 18    | 31 | 0,0056 | 0,007  | 0,0087 | 0,00128 | 0,00303 |
| 800  | 1852 | 301 | 426233 4519862 | -4312 | 2,3   | -0,8  | 23 | 0,006  | 0,0072 | 0,0032 | 0,00105 | 0,00513 |
| 896  | 1553 | 331 | 426147 4519338 | -4290 | 17,9  | 15    | 19 | 0,0061 | 0,0073 | 0,0032 | 0,00098 | 0,00488 |
| 1744 | 1762 | 164 | 426105 4519274 | -4354 | -18,1 | -4    | 35 | 0,0062 | 0,0071 | 0,0032 | 0,00106 | 0,00494 |
| 1079 | 1697 | 323 | 425935 4519525 | -2868 | 0     | 0,2   | 28 | 0,0059 | 0,0078 | 0,0073 | 0,00095 | 0,00192 |
| 1460 | 1981 | 336 | 425694 4519415 | -3853 | 1,4   | 12,2  | 32 | 0,0057 | 0,0085 | 0,0065 | 0,00049 | 0,00152 |
| 1042 | 1486 | 290 | 426271 4519498 | -4289 | -8    | -4,6  | 23 | 0,0061 | 0,0071 | 0,0032 | 0,00103 | 0,00491 |
| 1068 | 1608 | 479 | 425689 4519234 | -3456 | -14,3 | 17,3  | 29 | 0,0059 | 0,0078 | 0,0077 | 0,00085 | 0,00173 |
| 1473 | 1383 | 210 | 425686 4519428 | -2412 | -12,6 | -19,4 | 14 | 0,0056 | 0,007  | 0,0082 | 0,00143 | 0,00239 |
| 1729 | 1346 | 446 | 426461 4519408 | -3925 | -9,7  | -10,4 | 39 | 0,0055 | 0,0089 | 0,0061 | 0,00021 | 0,00096 |
| 947  | 1113 | 511 | 425846 4519786 | -4456 | 2,9   | 17,8  | 16 | 0,0058 | 0,0073 | 0,0033 | 0,00098 | 0,00495 |
| 1287 | 1674 | 167 | 426292 4519339 | -4038 | -16,3 | 13,1  | 24 | 0,0062 | 0,007  | 0,0031 | 0,00102 | 0,00476 |

|      |      |     |                |       |       |       |    |        |        |        |         |         |
|------|------|-----|----------------|-------|-------|-------|----|--------|--------|--------|---------|---------|
| 1586 | 1541 | 402 | 426283 4519605 | -3881 | 4,7   | -10,3 | 34 | 0,0056 | 0,009  | 0,006  | 0,00018 | 0,00112 |
| 1408 | 1637 | 277 | 425923 4519089 | -4485 | -3,2  | -1,4  | 22 | 0,006  | 0,0072 | 0,0033 | 0,00095 | 0,00479 |
| 1486 | 1491 | 459 | 426355 4519173 | -3778 | 18,5  | 7     | 29 | 0,0054 | 0,0085 | 0,0072 | 0,00037 | 0,00134 |
| 1041 | 1072 | 292 | 425563 4519019 | -3686 | -14   | -13,9 | 25 | 0,0061 | 0,0074 | 0,0036 | 0,00079 | 0,0043  |
| 1494 | 1472 | 354 | 425990 4519032 | -3167 | -4    | 17,3  | 32 | 0,0056 | 0,0076 | 0,0087 | 0,00088 | 0,00185 |
| 1896 | 1274 | 164 | 425679 4519089 | -3922 | 19,8  | -12,2 | 24 | 0,0059 | 0,0075 | 0,0036 | 0,00087 | 0,00445 |
| 977  | 1431 | 467 | 425972 4519453 | -3051 | -16,1 | -19   | 16 | 0,0057 | 0,0077 | 0,0075 | 0,00083 | 0,00185 |
| 1859 | 1468 | 215 | 425987 4519508 | -2788 | -9,4  | -11,7 | 15 | 0,0057 | 0,0076 | 0,0074 | 0,00068 | 0,00193 |
| 1285 | 1199 | 544 | 425548 4519278 | -3569 | -14,8 | -17,3 | 25 | 0,0058 | 0,0076 | 0,0076 | 0,00081 | 0,00165 |
| 1905 | 1946 | 246 | 426463 4519329 | -3672 | -2,1  | 18,6  | 15 | 0,0055 | 0,0087 | 0,0062 | 0,00022 | 0,001   |
| 1504 | 1817 | 353 | 425990 4519283 | -3752 | 9     | 2,3   | 23 | 0,0055 | 0,0083 | 0,0069 | 0,00043 | 0,00138 |
| 1435 | 1370 | 200 | 426059 4519043 | -2202 | 11    | 13,6  | 38 | 0,0053 | 0,0066 | 0,0093 | 0,00159 | 0,00276 |
| 1299 | 1544 | 222 | 425714 4519784 | -4223 | -5,6  | -4,3  | 13 | 0,0057 | 0,0072 | 0,0033 | 0,00095 | 0,00473 |
| 1033 | 907  | 319 | 425856 4519270 | -3661 | -4,7  | 19,9  | 32 | 0,006  | 0,0072 | 0,0034 | 0,00081 | 0,00428 |
| 1392 | 1679 | 172 | 425731 4519994 | -4102 | 12    | -1,6  | 38 | 0,0055 | 0,0073 | 0,0033 | 0,00093 | 0,0047  |
| 1532 | 908  | 306 | 425883 4519864 | -4209 | 2,8   | -12,2 | 36 | 0,0057 | 0,0071 | 0,0033 | 0,00097 | 0,00466 |
| 942  | 1915 | 289 | 425903 4519196 | -2595 | -9,1  | -0,6  | 17 | 0,0056 | 0,0068 | 0,0082 | 0,0014  | 0,0021  |
| 1701 | 1168 | 337 | 425552 4519925 | -3425 | -18,9 | 17,8  | 38 | 0,0057 | 0,0083 | 0,0061 | 0,00037 | 0,00164 |
| 1266 | 1105 | 316 | 426213 4519803 | -4265 | 0,8   | 15,8  | 21 | 0,0058 | 0,0069 | 0,0032 | 0,00099 | 0,00469 |
| 969  | 981  | 377 | 426307 4519610 | -4051 | -3,1  | 7,1   | 22 | 0,006  | 0,0068 | 0,0032 | 0,00097 | 0,00451 |
| 1816 | 966  | 244 | 425585 4519441 | -4098 | 5     | 16,7  | 35 | 0,0057 | 0,0072 | 0,0035 | 0,00089 | 0,00433 |

|      |      |     |                |       |       |       |    |        |        |        |         |         |
|------|------|-----|----------------|-------|-------|-------|----|--------|--------|--------|---------|---------|
| 1010 | 1209 | 546 | 426461 4519739 | -3250 | 16    | -10,1 | 21 | 0,0059 | 0,0082 | 0,0062 | 0,00035 | 0,00117 |
| 1500 | 1000 | 300 | 426100 4519300 | -4200 | 5     | 5     | 17 | 0,0059 | 0,0069 | 0,0033 | 0,00091 | 0,00442 |
| 1009 | 1776 | 172 | 426142 4519068 | -3641 | -19,5 | 2     | 34 | 0,006  | 0,0069 | 0,0033 | 0,0008  | 0,00421 |
| 1500 | 1000 | 300 | 426100 4519300 | -4200 | -7    | 5     | 34 | 0,0059 | 0,0068 | 0,0033 | 0,00093 | 0,00441 |
| 973  | 1372 | 415 | 425562 4519963 | -3114 | 5,8   | -18,9 | 31 | 0,0057 | 0,008  | 0,0062 | 0,00059 | 0,00184 |
| 1409 | 1443 | 178 | 426494 4519988 | -4075 | -9,7  | -11,4 | 26 | 0,0059 | 0,0066 | 0,0032 | 0,00109 | 0,00468 |
| 884  | 1306 | 442 | 426461 4519566 | -4375 | 5     | 2,2   | 23 | 0,0059 | 0,0067 | 0,0032 | 0,001   | 0,00463 |
| 1034 | 1554 | 254 | 425704 4519454 | -4067 | 19,3  | -18,9 | 28 | 0,0057 | 0,0071 | 0,0035 | 0,00084 | 0,00434 |
| 1276 | 885  | 498 | 425853 4519755 | -4446 | -12,4 | -15,7 | 29 | 0,0056 | 0,007  | 0,0033 | 0,00092 | 0,00456 |
| 1882 | 1609 | 427 | 425534 4519119 | -4177 | -19,7 | -18,8 | 40 | 0,0053 | 0,0079 | 0,007  | 0,00049 | 0,00103 |
| 1500 | 1480 | 300 | 426100 4519300 | -3000 | -7    | 5     | 26 | 0,0054 | 0,0075 | 0,0076 | 0,00065 | 0,00169 |
| 845  | 1844 | 180 | 426121 4519176 | -3473 | -16,6 | -12,4 | 12 | 0,006  | 0,0069 | 0,0033 | 0,00076 | 0,00414 |
| 1580 | 1161 | 268 | 425973 4519924 | -2732 | -12   | 17,9  | 30 | 0,0059 | 0,0075 | 0,0067 | 0,00054 | 0,0015  |
| 1170 | 1972 | 211 | 426227 4519248 | -2489 | 9,1   | 13,2  | 33 | 0,0055 | 0,0068 | 0,0076 | 0,00108 | 0,00215 |
| 1700 | 1342 | 178 | 426226 4519685 | -4124 | 13,4  | 8,6   | 38 | 0,0057 | 0,0069 | 0,0033 | 0,00094 | 0,0045  |
| 849  | 913  | 448 | 425954 4519580 | -3945 | -4,9  | 10,2  | 10 | 0,0058 | 0,0069 | 0,0033 | 0,00085 | 0,0043  |
| 1129 | 1112 | 233 | 426018 4519025 | -2001 | 5,4   | -3,2  | 32 | 0,0054 | 0,0063 | 0,0082 | 0,00136 | 0,00246 |
| 1456 | 1500 | 316 | 426063 4519344 | -3094 | 3,4   | 3,4   | 14 | 0,0054 | 0,0075 | 0,0075 | 0,00063 | 0,00156 |
| 921  | 1883 | 526 | 425758 4519240 | -3707 | -19,5 | 6     | 26 | 0,0055 | 0,0077 | 0,007  | 0,00059 | 0,00133 |
| 1317 | 1371 | 226 | 426120 4519754 | -4134 | 15,2  | 2,3   | 29 | 0,0056 | 0,0068 | 0,0033 | 0,0009  | 0,00442 |
| 1384 | 1540 | 235 | 425620 4519862 | -4288 | -18,9 | -19,8 | 22 | 0,0054 | 0,007  | 0,0034 | 0,00088 | 0,0044  |

|      |      |     |                |       |       |       |    |        |        |        |         |         |
|------|------|-----|----------------|-------|-------|-------|----|--------|--------|--------|---------|---------|
| 1753 | 1168 | 307 | 426041 4519555 | -2997 | -8,9  | -17,1 | 36 | 0,0054 | 0,0076 | 0,007  | 0,00048 | 0,00155 |
| 873  | 1639 | 455 | 425922 4519017 | -2912 | 8,9   | 6,8   | 22 | 0,0055 | 0,0067 | 0,0089 | 0,00128 | 0,00181 |
| 1250 | 844  | 203 | 425999 4519232 | -2900 | 12    | -17,5 | 31 | 0,0061 | 0,0069 | 0,0036 | 0,00061 | 0,00362 |
| 1761 | 968  | 208 | 425603 4519693 | -2285 | 13,1  | 9     | 38 | 0,0052 | 0,0068 | 0,0078 | 0,00134 | 0,00192 |
| 910  | 828  | 212 | 425784 4519905 | -2536 | -14,2 | 14,2  | 36 | 0,0058 | 0,0071 | 0,0037 | 0,00059 | 0,00351 |
| 1547 | 1864 | 210 | 426209 4519958 | -4472 | -12,1 | 14,2  | 17 | 0,0054 | 0,0066 | 0,0032 | 0,00099 | 0,00461 |
| 1859 | 1371 | 215 | 426168 4519068 | -2572 | -1,3  | 16,8  | 34 | 0,0051 | 0,0067 | 0,0089 | 0,00088 | 0,00216 |
| 1808 | 1446 | 340 | 425811 4519134 | -3594 | -19,7 | -7,4  | 11 | 0,0052 | 0,0075 | 0,0076 | 0,0005  | 0,00125 |
| 1290 | 848  | 511 | 426076 4519648 | -4435 | -19,4 | -1,6  | 18 | 0,0056 | 0,0066 | 0,0033 | 0,00091 | 0,00435 |
| 991  | 1260 | 510 | 425543 4519253 | -4395 | 16,7  | 2,8   | 28 | 0,0055 | 0,0069 | 0,0037 | 0,00078 | 0,00402 |
| 830  | 952  | 319 | 426419 4519235 | -3271 | 8,6   | 9,4   | 24 | 0,0061 | 0,0065 | 0,0033 | 0,00074 | 0,00375 |
| 1001 | 936  | 243 | 425624 4519842 | -3039 | 18,7  | 3,8   | 12 | 0,0055 | 0,007  | 0,0037 | 0,00066 | 0,00382 |
| 1576 | 1939 | 194 | 426223 4519174 | -2714 | 5,9   | 19,7  | 29 | 0,0052 | 0,007  | 0,0079 | 0,00082 | 0,00171 |
| 1735 | 827  | 331 | 425573 4519835 | -4171 | 4,7   | -14   | 37 | 0,0052 | 0,007  | 0,0035 | 0,00087 | 0,0041  |
| 1407 | 1271 | 374 | 426000 4519062 | -2965 | 4     | -14,5 | 26 | 0,0052 | 0,0067 | 0,0088 | 0,00095 | 0,00169 |
| 988  | 810  | 307 | 426309 4519205 | -3172 | -14,7 | 8,5   | 38 | 0,006  | 0,0065 | 0,0033 | 0,00069 | 0,00359 |
| 1184 | 1152 | 188 | 425885 4519371 | -3209 | -10,5 | 8,3   | 15 | 0,0057 | 0,0067 | 0,0035 | 0,00065 | 0,0037  |
| 877  | 1591 | 427 | 425553 4519341 | -2985 | -11,6 | -5,6  | 35 | 0,0055 | 0,0067 | 0,0076 | 0,00106 | 0,00156 |
| 1938 | 1222 | 372 | 426204 4519501 | -3702 | 16,2  | 0,3   | 32 | 0,0051 | 0,0079 | 0,0065 | 0,00021 | 0,00107 |
| 1246 | 1999 | 156 | 426146 4519117 | -2188 | -4,6  | -11,6 | 34 | 0,0053 | 0,006  | 0,0077 | 0,00113 | 0,00219 |
| 1989 | 998  | 165 | 425762 4519491 | -3706 | -15,1 | 14,8  | 32 | 0,0055 | 0,0066 | 0,0035 | 0,00079 | 0,00389 |



|      |      |     |                |       |       |       |    |        |        |        |         |         |
|------|------|-----|----------------|-------|-------|-------|----|--------|--------|--------|---------|---------|
| 1825 | 1815 | 401 | 425762 4519189 | -4237 | -12,7 | -11,8 | 38 | 0,0048 | 0,0079 | 0,0064 | 0,00029 | 0,00081 |
| 1562 | 1626 | 332 | 426471 4519662 | -3732 | -2,6  | 8,3   | 28 | 0,0054 | 0,0082 | 0,0056 | 0,00015 | 0,0007  |
| 987  | 1081 | 481 | 426320 4519246 | -4270 | 7,4   | 0,4   | 40 | 0,0056 | 0,0064 | 0,0033 | 0,00083 | 0,004   |
| 1363 | 998  | 549 | 426195 4519631 | -3469 | 12,5  | -6,6  | 27 | 0,0052 | 0,0077 | 0,0064 | 0,00026 | 0,00109 |
| 1274 | 966  | 505 | 425898 4519002 | -4365 | 19,9  | -7,4  | 10 | 0,0055 | 0,0066 | 0,0036 | 0,00073 | 0,00382 |
| 943  | 1240 | 322 | 426319 4519429 | -3972 | 8,2   | -12,5 | 34 | 0,0056 | 0,0063 | 0,0033 | 0,00082 | 0,00392 |
| 1755 | 1094 | 173 | 425688 4519474 | -2150 | 19,1  | 13,5  | 27 | 0,005  | 0,0063 | 0,0083 | 0,00158 | 0,00154 |
| 950  | 1129 | 178 | 425890 4519520 | -2680 | -13,3 | 3,4   | 28 | 0,0057 | 0,0067 | 0,0037 | 0,00052 | 0,00317 |
| 991  | 826  | 545 | 425550 4519625 | -4072 | 0,6   | 5,9   | 39 | 0,0052 | 0,0068 | 0,0036 | 0,00075 | 0,00381 |
| 833  | 1357 | 192 | 426075 4519762 | -3004 | 12,6  | 8,9   | 34 | 0,0056 | 0,0065 | 0,0035 | 0,00063 | 0,00365 |
| 849  | 1518 | 305 | 425536 4519344 | -3854 | 8,3   | -13,2 | 25 | 0,0053 | 0,0068 | 0,0037 | 0,00069 | 0,00369 |
| 1357 | 1666 | 494 | 425535 4519278 | -4149 | 3,4   | -11,2 | 37 | 0,0051 | 0,0074 | 0,0063 | 0,00048 | 0,0012  |
| 1169 | 1575 | 465 | 426463 4519918 | -3855 | -12,7 | -4,6  | 14 | 0,0056 | 0,0083 | 0,0053 | 0,00015 | 0,00061 |
| 1291 | 1115 | 166 | 425794 4519462 | -2995 | -1,3  | 14,4  | 28 | 0,0056 | 0,0066 | 0,0037 | 0,00058 | 0,00346 |
| 1944 | 1735 | 188 | 425681 4519078 | -2849 | -5,1  | 0,4   | 12 | 0,0055 | 0,0063 | 0,0085 | 0,00094 | 0,0014  |
| 1724 | 854  | 205 | 426070 4519257 | -3491 | -5,9  | 11,8  | 29 | 0,0057 | 0,0064 | 0,0035 | 0,00073 | 0,00364 |
| 1533 | 1040 | 540 | 425634 4519396 | -3723 | -12,5 | -18,2 | 26 | 0,0051 | 0,0073 | 0,0068 | 0,00047 | 0,0012  |
| 919  | 1720 | 328 | 425908 4519904 | -2921 | -11,8 | 0     | 25 | 0,0056 | 0,0072 | 0,006  | 0,00048 | 0,0012  |
| 1683 | 875  | 228 | 425996 4519870 | -3789 | 13,6  | -17,5 | 36 | 0,0053 | 0,0065 | 0,0034 | 0,00079 | 0,00387 |
| 1276 | 1701 | 183 | 425573 4519143 | -3749 | 10,3  | -20   | 38 | 0,0053 | 0,0066 | 0,0038 | 0,00065 | 0,00354 |
| 1522 | 1053 | 364 | 425540 4519798 | -4283 | 15,5  | 16,3  | 32 | 0,0049 | 0,0068 | 0,0037 | 0,00077 | 0,00373 |

|      |      |     |                |       |       |       |    |        |        |        |         |         |
|------|------|-----|----------------|-------|-------|-------|----|--------|--------|--------|---------|---------|
| 1079 | 1016 | 267 | 425537 4519219 | -2153 | 16,8  | -10,3 | 19 | 0,0052 | 0,0062 | 0,0079 | 0,00166 | 0,00126 |
| 922  | 1743 | 364 | 425516 4519480 | -3055 | 7,7   | -19,8 | 15 | 0,0053 | 0,0068 | 0,007  | 0,00079 | 0,00149 |
| 855  | 859  | 406 | 425961 4519519 | -3534 | -5,3  | -17,5 | 29 | 0,0055 | 0,0064 | 0,0035 | 0,00066 | 0,00359 |
| 1945 | 1924 | 395 | 425744 4519295 | -4433 | 0,3   | 2,3   | 18 | 0,0046 | 0,0077 | 0,0056 | 0,00028 | 0,00095 |
| 1483 | 1051 | 452 | 425513 4519179 | -3328 | 15,7  | -9,2  | 36 | 0,0054 | 0,0063 | 0,0077 | 0,00084 | 0,0014  |
| 1545 | 836  | 326 | 425774 4519144 | -3942 | -19,7 | 12,6  | 28 | 0,0055 | 0,0063 | 0,0036 | 0,00068 | 0,00349 |
| 1672 | 1380 | 230 | 425829 4519875 | -2915 | -16,5 | -9,3  | 35 | 0,0053 | 0,0071 | 0,0062 | 0,00038 | 0,00118 |
| 1892 | 1080 | 298 | 426091 4519699 | -3049 | -9,7  | 17,9  | 18 | 0,0052 | 0,0073 | 0,0066 | 0,00027 | 0,00104 |
| 1191 | 1491 | 230 | 426170 4519347 | -3973 | 18    | -12   | 15 | 0,0054 | 0,0062 | 0,0034 | 0,00073 | 0,00368 |
| 1887 | 1576 | 367 | 426496 4519231 | -4040 | 0,8   | 16,9  | 13 | 0,0047 | 0,0078 | 0,006  | 0,00016 | 0,00058 |
| 853  | 908  | 230 | 425880 4519025 | -2311 | -1,2  | -9,9  | 10 | 0,006  | 0,0066 | 0,0042 | 0,00036 | 0,00214 |
| 1747 | 1702 | 204 | 426462 4519680 | -4379 | 1,4   | -6,7  | 36 | 0,0053 | 0,0061 | 0,0033 | 0,00091 | 0,00401 |
| 1955 | 1544 | 434 | 426186 4519224 | -4280 | 17    | -18   | 36 | 0,0046 | 0,0076 | 0,0061 | 0,0002  | 0,0008  |
| 946  | 1026 | 465 | 425835 4519927 | -4128 | 16,3  | 3,6   | 20 | 0,005  | 0,0065 | 0,0035 | 0,00073 | 0,00379 |
| 1824 | 867  | 283 | 425767 4519427 | -2518 | -2,6  | 18,1  | 24 | 0,0049 | 0,0061 | 0,008  | 0,00092 | 0,00158 |
| 1668 | 1553 | 313 | 426165 4519386 | -3542 | -1,2  | 11,6  | 15 | 0,0049 | 0,0075 | 0,0064 | 0,00021 | 0,00089 |
| 1320 | 1150 | 443 | 426130 4519953 | -3455 | 11,8  | 4,7   | 25 | 0,0053 | 0,0077 | 0,0058 | 0,00017 | 0,00094 |
| 1691 | 1638 | 275 | 425598 4519145 | -3425 | 14,5  | 0,9   | 19 | 0,0053 | 0,0065 | 0,0073 | 0,00069 | 0,00126 |
| 800  | 1000 | 300 | 426100 4519300 | -3000 | 5     | 5     | 21 | 0,0057 | 0,0063 | 0,0036 | 0,00051 | 0,00311 |
| 1563 | 932  | 313 | 425513 4519252 | -3980 | -8,9  | 16    | 28 | 0,0052 | 0,0065 | 0,0038 | 0,00067 | 0,00337 |
| 848  | 981  | 391 | 425729 4519889 | -3668 | -15,1 | 8,8   | 30 | 0,005  | 0,0065 | 0,0036 | 0,00066 | 0,00358 |

|      |      |     |                |       |       |       |    |        |        |        |         |         |         |
|------|------|-----|----------------|-------|-------|-------|----|--------|--------|--------|---------|---------|---------|
| 1032 | 1326 | 476 | 425898 4519843 | -3388 | 12,4  | 10,1  | 11 | 0,0052 | 0,0074 | 0,0059 | 0,0003  | 0,00111 |         |
| 1500 | 1000 | 420 | 426100 4519300 | -3000 | -7    | 5     | 23 | 0,0049 | 0,0066 | 0,0075 | 0,00053 |         | 0,00132 |
| 1500 | 1000 | 300 | 426100 4519300 | -2520 | -7    | 5     | 22 | 0,0049 | 0,0059 | 0,0076 | 0,00073 |         | 0,00184 |
| 1102 | 1998 | 196 | 425508 4519188 | -2455 | 6,2   | 10,2  | 32 | 0,0053 | 0,006  | 0,0078 | 0,00136 |         | 0,00138 |
| 1500 | 1000 | 420 | 426100 4519300 | -3000 | 5     | 5     | 34 | 0,0048 | 0,0066 | 0,0077 | 0,00058 |         | 0,00131 |
| 1070 | 1086 | 307 | 426250 4519522 | -3833 | 2,1   | 1,1   | 40 | 0,0054 | 0,006  | 0,0034 | 0,00074 |         | 0,00354 |
| 853  | 1121 | 377 | 425780 4519229 | -2367 | 15,8  | 1,6   | 26 | 0,0049 | 0,0058 | 0,0078 | 0,00135 |         | 0,00143 |
| 1836 | 965  | 176 | 425685 4519171 | -3182 | 18,6  | -9,3  | 34 | 0,0054 | 0,0064 | 0,0041 | 0,00055 |         | 0,0031  |
| 1542 | 1725 | 382 | 425562 4519251 | -4007 | -16,6 | 17,9  | 18 | 0,0048 | 0,0072 | 0,0062 | 0,00037 |         | 0,00098 |
| 1011 | 1048 | 454 | 426147 4519411 | -4156 | -0,3  | 1,8   | 31 | 0,0053 | 0,0061 | 0,0034 | 0,00072 |         | 0,00357 |
| 1472 | 1413 | 222 | 425762 4519298 | -4031 | -0,8  | -5,3  | 25 | 0,0051 | 0,0063 | 0,0036 | 0,00067 |         | 0,0034  |
| 1061 | 1786 | 415 | 426267 4519307 | -3466 | 2,3   | -7,3  | 25 | 0,0049 | 0,0073 | 0,0065 | 0,00029 |         | 0,00084 |
| 818  | 1958 | 461 | 425830 4519272 | -3374 | 19,7  | -5,8  | 31 | 0,0051 | 0,0068 | 0,0069 | 0,00056 |         | 0,00107 |
| 808  | 1579 | 259 | 426119 4519821 | -3726 | 4,4   | 11,1  | 33 | 0,0052 | 0,0061 | 0,0034 | 0,0007  | 0,00359 |         |
| 842  | 1836 | 282 | 426054 4519080 | -3962 | -9,6  | -0,3  | 11 | 0,0053 | 0,0061 | 0,0035 | 0,00064 |         | 0,00341 |
| 1668 | 1481 | 204 | 426218 4519850 | -4241 | -18,7 | 10,1  | 10 | 0,0052 | 0,0059 | 0,0033 | 0,00086 |         | 0,00379 |
| 927  | 1632 | 179 | 426079 4519408 | -3192 | 17,5  | -10,6 | 30 | 0,0054 | 0,0061 | 0,0036 | 0,00054 |         | 0,00326 |
| 1221 | 896  | 429 | 426381 4519381 | -2631 | -0,5  | 17,4  | 10 | 0,0049 | 0,006  | 0,007  | 0,00055 |         | 0,00166 |
| 875  | 1101 | 425 | 425661 4519515 | -3876 | 12,3  | 15,4  | 34 | 0,005  | 0,0064 | 0,0037 | 0,00063 |         | 0,00333 |
| 1872 | 1255 | 186 | 426129 4519956 | -2549 | -0,2  | -1,8  | 17 | 0,0053 | 0,0066 | 0,0064 | 0,00038 |         | 0,00109 |
| 867  | 1747 | 207 | 426197 4519865 | -3634 | -19,2 | 16,2  | 22 | 0,0051 | 0,006  | 0,0033 | 0,00071 |         | 0,00358 |

|      |      |     |                |       |       |       |    |        |        |        |         |         |         |
|------|------|-----|----------------|-------|-------|-------|----|--------|--------|--------|---------|---------|---------|
| 1190 | 1608 | 476 | 426005 4519541 | -3869 | 10,9  | -2,9  | 35 | 0,0048 | 0,0074 | 0,0059 | 0,0002  | 0,00085 |         |
| 1758 | 956  | 393 | 425749 4519120 | -3073 | -11,9 | -6,5  | 30 | 0,005  | 0,006  | 0,0081 | 0,00071 |         | 0,00118 |
| 1912 | 1570 | 357 | 426301 4519785 | -4162 | -9,2  | 1     | 24 | 0,0048 | 0,0079 | 0,0051 | 0,00012 |         | 0,00051 |
| 1447 | 1760 | 519 | 425843 4519738 | -4467 | 19,1  | 7,9   | 25 | 0,0044 | 0,0076 | 0,005  | 0,00023 |         | 0,00115 |
| 854  | 1023 | 272 | 426301 4519818 | -3111 | 2,9   | 2,2   | 32 | 0,0054 | 0,0058 | 0,0035 | 0,00061 |         | 0,00325 |
| 1082 | 862  | 339 | 426306 4519883 | -3671 | 8,6   | 3,1   | 24 | 0,0052 | 0,0058 | 0,0034 | 0,00072 |         | 0,00346 |
| 1267 | 973  | 171 | 426435 4519608 | -2787 | -1,4  | 7,7   | 18 | 0,0056 | 0,0057 | 0,0035 | 0,00058 |         | 0,00294 |
| 862  | 1910 | 241 | 425872 4519818 | -3892 | 19,5  | -9,8  | 24 | 0,0049 | 0,0062 | 0,0035 | 0,00064 |         | 0,00348 |
| 1035 | 1422 | 397 | 426454 4519029 | -4267 | 16,9  | -11,9 | 30 | 0,0053 | 0,0058 | 0,0034 | 0,00071 |         | 0,00339 |
| 1023 | 1730 | 376 | 426283 4519095 | -3038 | -6,6  | -3,1  | 29 | 0,0048 | 0,0064 | 0,0073 | 0,00054 |         | 0,00111 |
| 1344 | 1317 | 355 | 425826 4519901 | -4349 | 5,8   | -18,1 | 39 | 0,0046 | 0,0062 | 0,0035 | 0,00069 |         | 0,00351 |
| 1583 | 852  | 373 | 425514 4519981 | -3081 | -6,8  | -19,3 | 21 | 0,0049 | 0,0069 | 0,0056 | 0,00038 |         | 0,00141 |
| 1440 | 1471 | 279 | 425897 4519921 | -4334 | -15,9 | -11,9 | 21 | 0,0048 | 0,006  | 0,0034 | 0,00073 |         | 0,00358 |
| 869  | 1455 | 544 | 426142 4519207 | -4428 | -15,2 | -5,8  | 36 | 0,0051 | 0,0059 | 0,0035 | 0,00067 |         | 0,00343 |
| 1214 | 1877 | 388 | 426397 4519922 | -3958 | -10,5 | 16,4  | 33 | 0,0051 | 0,0077 | 0,0049 | 0,00011 |         | 0,00053 |
| 1488 | 1049 | 277 | 426355 4519440 | -4022 | 5     | -13,9 | 18 | 0,0052 | 0,0057 | 0,0034 | 0,00074 |         | 0,00333 |
| 1910 | 889  | 225 | 425647 4519942 | -3677 | 17,6  | -19,4 | 15 | 0,0046 | 0,0064 | 0,0037 | 0,00065 |         | 0,0032  |
| 1782 | 1627 | 403 | 425929 4519787 | -4315 | 11,4  | -1,2  | 40 | 0,0044 | 0,0075 | 0,005  | 0,00018 |         | 0,00103 |
| 1593 | 952  | 469 | 425872 4519023 | -4380 | -12,3 | -14,5 | 24 | 0,0051 | 0,0059 | 0,0037 | 0,00064 |         | 0,00319 |
| 1067 | 1901 | 417 | 425512 4519377 | -4452 | 4,1   | 6,9   | 37 | 0,0046 | 0,0063 | 0,0039 | 0,0006  | 0,00306 |         |
| 828  | 1826 | 175 | 426034 4519753 | -2100 | 17,2  | -13   | 33 | 0,0051 | 0,0057 | 0,0058 | 0,00079 |         | 0,00097 |

|      |      |     |                |       |       |       |    |        |        |        |         |         |
|------|------|-----|----------------|-------|-------|-------|----|--------|--------|--------|---------|---------|
| 1051 | 1546 | 157 | 425702 4519208 | -2030 | -6,7  | 0,5   | 17 | 0,005  | 0,0058 | 0,0066 | 0,00104 | 0,00103 |
| 1422 | 1333 | 151 | 426295 4519077 | -3109 | 9,4   | -17,4 | 12 | 0,0055 | 0,0057 | 0,0036 | 0,0005  | 0,00289 |
| 1189 | 1140 | 344 | 425529 4519300 | -3919 | -7    | -0,1  | 35 | 0,0049 | 0,0062 | 0,0039 | 0,00057 | 0,00295 |
| 1995 | 1588 | 228 | 425928 4519434 | -4383 | 4     | -3,1  | 39 | 0,0047 | 0,006  | 0,0036 | 0,00068 | 0,0033  |
| 1683 | 910  | 444 | 426343 4519414 | -3259 | 15,6  | -11,9 | 23 | 0,0046 | 0,0067 | 0,0067 | 0,00023 | 0,00086 |
| 1500 | 1384 | 300 | 426292 4519300 | -3000 | -3,2  | 5     | 19 | 0,0046 | 0,0065 | 0,0069 | 0,00034 | 0,00098 |
| 850  | 836  | 486 | 425819 4519972 | -2540 | -4,7  | 18,1  | 35 | 0,0049 | 0,0062 | 0,0061 | 0,00062 | 0,0011  |
| 1870 | 1535 | 167 | 426295 4519447 | -4084 | -8,4  | 5,2   | 39 | 0,0051 | 0,0056 | 0,0034 | 0,00078 | 0,00332 |
| 800  | 1518 | 209 | 425808 4519395 | -2097 | 6,8   | -13,9 | 37 | 0,0049 | 0,0057 | 0,0062 | 0,00095 | 0,001   |
| 1238 | 1284 | 324 | 425633 4519480 | -4096 | -8,4  | 14,2  | 36 | 0,0048 | 0,0061 | 0,0037 | 0,00061 | 0,00309 |
| 1095 | 1108 | 414 | 425813 4519770 | -2920 | -4,9  | 2,2   | 37 | 0,0049 | 0,0064 | 0,0064 | 0,00048 | 0,00107 |
| 1237 | 818  | 393 | 425610 4519520 | -2571 | -6,1  | 11,6  | 28 | 0,0047 | 0,0058 | 0,0071 | 0,0009  | 0,0012  |
| 1350 | 830  | 166 | 425892 4519023 | -2158 | 7,2   | 11,1  | 28 | 0,0058 | 0,006  | 0,0047 | 0,00033 | 0,0015  |
| 1183 | 938  | 233 | 425720 4519628 | -2945 | 13    | 5,1   | 16 | 0,005  | 0,0061 | 0,004  | 0,00045 | 0,00275 |
| 1399 | 1421 | 212 | 426439 4519670 | -3986 | 19,6  | -10,8 | 11 | 0,005  | 0,0056 | 0,0034 | 0,00072 | 0,00334 |
| 1722 | 1122 | 457 | 426391 4519302 | -3771 | -1,8  | 7,3   | 24 | 0,0045 | 0,0071 | 0,0061 | 0,00012 | 0,00054 |
| 1365 | 1653 | 366 | 425557 4519043 | -3705 | 9,8   | -6,2  | 21 | 0,0049 | 0,0061 | 0,0068 | 0,00055 | 0,00102 |
| 1374 | 1322 | 163 | 426347 4519060 | -3178 | -18,1 | -1,1  | 35 | 0,0055 | 0,0055 | 0,0035 | 0,00054 | 0,00278 |
| 1593 | 1362 | 177 | 426209 4519441 | -2341 | -0,5  | -12,5 | 10 | 0,0048 | 0,0055 | 0,0068 | 0,00059 | 0,00136 |
| 1994 | 1686 | 213 | 426080 4519871 | -4412 | 12,3  | -17,2 | 15 | 0,0044 | 0,0061 | 0,0035 | 0,00068 | 0,00335 |
| 892  | 1735 | 466 | 426105 4519528 | -3457 | 18,4  | 5,3   | 18 | 0,0048 | 0,0068 | 0,006  | 0,00024 | 0,00076 |

|      |      |     |                |       |       |       |    |        |        |        |         |         |         |
|------|------|-----|----------------|-------|-------|-------|----|--------|--------|--------|---------|---------|---------|
| 1450 | 1836 | 341 | 426081 4519897 | -4016 | 7     | -8,5  | 30 | 0,0046 | 0,0075 | 0,0051 | 8E-05   | 0,00077 |         |
| 1144 | 1091 | 231 | 426182 4519154 | -3148 | 14,5  | -8,9  | 28 | 0,0054 | 0,0057 | 0,0037 | 0,00045 |         | 0,0027  |
| 1076 | 1240 | 285 | 426153 4519420 | -3781 | 9     | -13,9 | 24 | 0,005  | 0,0057 | 0,0035 | 0,0006  | 0,00306 |         |
| 1022 | 1510 | 187 | 425501 4519822 | -2340 | -8,5  | 7,6   | 38 | 0,0047 | 0,0062 | 0,0056 | 0,00073 |         | 0,0013  |
| 1528 | 1867 | 163 | 425619 4519324 | -2576 | -3,2  | -0,5  | 39 | 0,0049 | 0,0057 | 0,0073 | 0,00088 |         | 0,00109 |
| 1691 | 992  | 417 | 425927 4519132 | -4337 | 4,2   | -19,3 | 32 | 0,0048 | 0,0058 | 0,0038 | 0,0006  | 0,003   |         |
| 1624 | 1429 | 343 | 426252 4519343 | -3572 | -5,2  | -13   | 34 | 0,0044 | 0,0069 | 0,0062 | 0,00015 |         | 0,00061 |
| 1326 | 1826 | 185 | 425595 4519009 | -2489 | -9,9  | 1,7   | 33 | 0,005  | 0,0053 | 0,0081 | 0,00116 |         | 0,00104 |
| 1308 | 1982 | 374 | 426236 4519961 | -4114 | -16,8 | 18,2  | 18 | 0,0047 | 0,0075 | 0,0047 | 8E-05   | 0,00059 |         |
| 1500 | 1000 | 180 | 426100 4519300 | -3000 | 5     | 5     | 17 | 0,0053 | 0,0056 | 0,0038 | 0,00044 |         | 0,00266 |
| 806  | 1957 | 227 | 426412 4519851 | -3751 | -19,9 | 8,8   | 19 | 0,0049 | 0,0054 | 0,0034 | 0,00069 |         | 0,00323 |
| 990  | 958  | 230 | 425682 4519730 | -2147 | -12,1 | 16,2  | 31 | 0,0048 | 0,006  | 0,0056 | 0,00065 |         | 0,00101 |
| 917  | 914  | 491 | 426437 4519301 | -2551 | 14,1  | 18,3  | 27 | 0,0048 | 0,0052 | 0,0066 | 0,00053 |         | 0,00155 |
| 1104 | 1807 | 464 | 425760 4519152 | -3868 | 15,9  | 11,2  | 13 | 0,0046 | 0,0064 | 0,0064 | 0,00039 |         | 0,00084 |
| 1832 | 968  | 175 | 425741 4519683 | -3328 | -15,2 | 4,7   | 27 | 0,0048 | 0,0058 | 0,0037 | 0,00054 |         | 0,00289 |
| 1419 | 1540 | 378 | 425592 4519433 | -4405 | 11,5  | 19,8  | 29 | 0,0044 | 0,0061 | 0,004  | 0,00056 |         | 0,00276 |
| 1201 | 1247 | 224 | 425552 4519770 | -3383 | -17,3 | -6,6  | 17 | 0,0046 | 0,0061 | 0,0039 | 0,00049 |         | 0,00281 |
| 1005 | 1454 | 259 | 425523 4519042 | -3331 | -6,5  | -19,5 | 30 | 0,005  | 0,0059 | 0,0043 | 0,00043 |         | 0,00253 |
| 1935 | 930  | 211 | 426455 4519619 | -3785 | -11,4 | -3,3  | 39 | 0,0051 | 0,0052 | 0,0034 | 0,00079 |         | 0,00305 |
| 1238 | 1435 | 353 | 425584 4519521 | -4252 | -17,7 | 1,3   | 30 | 0,0046 | 0,0059 | 0,0037 | 0,00057 |         | 0,00295 |
| 1500 | 1000 | 180 | 426100 4519300 | -3000 | -7    | 5     | 31 | 0,0053 | 0,0055 | 0,0037 | 0,00044 |         | 0,0026  |

|      |      |     |                |       |       |       |    |        |        |        |         |         |
|------|------|-----|----------------|-------|-------|-------|----|--------|--------|--------|---------|---------|
| 1334 | 1358 | 297 | 426410 4519631 | -2922 | -19,5 | 4,3   | 12 | 0,0049 | 0,0063 | 0,0059 | 0,00027 | 0,0007  |
| 1464 | 875  | 409 | 425842 4519041 | -2724 | 2,4   | -1    | 13 | 0,0047 | 0,0052 | 0,0086 | 0,00094 | 0,00114 |
| 1433 | 1315 | 469 | 426285 4519080 | -3671 | 19    | 16,3  | 11 | 0,0043 | 0,0065 | 0,0069 | 0,00025 | 0,00064 |
| 1214 | 1544 | 253 | 425923 4519806 | -4052 | 0,3   | 5,2   | 38 | 0,0046 | 0,0058 | 0,0036 | 0,0006  | 0,00307 |
| 961  | 1268 | 307 | 425611 4519150 | -2437 | 13,3  | 19,8  | 19 | 0,0048 | 0,0053 | 0,0077 | 0,00116 | 0,00097 |
| 1082 | 1170 | 224 | 425959 4519834 | -2263 | -6,3  | -18   | 35 | 0,0048 | 0,0055 | 0,0059 | 0,00057 | 0,00088 |
| 1876 | 1370 | 287 | 426175 4519141 | -4395 | 14,6  | -17,9 | 11 | 0,0047 | 0,0057 | 0,0037 | 0,0006  | 0,00296 |
| 931  | 1311 | 157 | 425672 4519755 | -2295 | -5,7  | -3,6  | 29 | 0,0049 | 0,006  | 0,0044 | 0,00038 | 0,00176 |
| 1465 | 1731 | 347 | 425943 4519058 | -4474 | 7,3   | 12,4  | 11 | 0,0046 | 0,0057 | 0,0039 | 0,00055 | 0,00285 |
| 973  | 1938 | 386 | 426479 4519933 | -4455 | 0,7   | -1,3  | 35 | 0,0046 | 0,0055 | 0,0034 | 0,00071 | 0,00326 |
| 1321 | 1314 | 446 | 426350 4519094 | -4439 | 4,2   | -13,5 | 30 | 0,0048 | 0,0054 | 0,0036 | 0,00062 | 0,00296 |
| 1009 | 886  | 311 | 426039 4519648 | -3156 | -3,7  | -15,3 | 35 | 0,005  | 0,0055 | 0,0037 | 0,00045 | 0,00264 |
| 1896 | 954  | 249 | 425961 4519998 | -2804 | 12,2  | -8,5  | 30 | 0,0047 | 0,0063 | 0,006  | 0,00028 | 0,00107 |
| 1568 | 1238 | 383 | 425921 4519934 | -3744 | -19,7 | -5,5  | 23 | 0,0045 | 0,007  | 0,0053 | 8E-05   | 0,0007  |
| 1153 | 984  | 349 | 425739 4519571 | -2585 | 0,6   | -18   | 21 | 0,0045 | 0,0056 | 0,0067 | 0,00072 | 0,00101 |
| 1025 | 906  | 500 | 425972 4519018 | -3862 | 11,1  | -2,6  | 20 | 0,0049 | 0,0055 | 0,0039 | 0,00047 | 0,00263 |
| 1515 | 1997 | 469 | 426099 4519456 | -4487 | 10,6  | -1,5  | 35 | 0,0039 | 0,007  | 0,005  | 0,00014 | 0,00075 |
| 856  | 1704 | 287 | 425615 4519683 | -3713 | 17,5  | -3,4  | 35 | 0,0044 | 0,0059 | 0,0038 | 0,00048 | 0,00272 |
| 1371 | 893  | 330 | 426305 4519791 | -2566 | -9,8  | -9,2  | 33 | 0,0049 | 0,0055 | 0,0061 | 0,00034 | 0,00085 |
| 1925 | 1129 | 324 | 425652 4519766 | -4385 | -15,9 | 18    | 18 | 0,0043 | 0,0057 | 0,0037 | 0,0006  | 0,0029  |
| 1065 | 1255 | 158 | 425933 4519647 | -2565 | -12,3 | 8,6   | 24 | 0,005  | 0,0056 | 0,004  | 0,00031 | 0,00207 |

|      |      |     |                |       |       |       |    |        |        |        |         |         |
|------|------|-----|----------------|-------|-------|-------|----|--------|--------|--------|---------|---------|
| 815  | 1055 | 327 | 426224 4519076 | -2999 | -8,1  | 14    | 19 | 0,0053 | 0,0053 | 0,0038 | 0,00035 | 0,00223 |
| 1396 | 807  | 351 | 426232 4519016 | -3609 | 16,6  | 1,4   | 17 | 0,0051 | 0,0053 | 0,0038 | 0,00048 | 0,00254 |
| 1877 | 1079 | 277 | 425920 4519635 | -4161 | 3     | 12,5  | 16 | 0,0045 | 0,0056 | 0,0037 | 0,0006  | 0,00286 |
| 973  | 1122 | 198 | 426108 4519379 | -2586 | 10,9  | 18,1  | 20 | 0,0053 | 0,0054 | 0,0039 | 0,0003  | 0,0019  |
| 1532 | 905  | 313 | 425797 4519276 | -3708 | 19,2  | 19,3  | 18 | 0,0047 | 0,0056 | 0,004  | 0,00047 | 0,00254 |
| 1637 | 1107 | 478 | 426186 4519093 | -3696 | -5,4  | -7,2  | 37 | 0,0041 | 0,0063 | 0,0067 | 0,00018 | 0,00054 |
| 1203 | 1540 | 449 | 425863 4519199 | -4435 | 15,8  | 6,6   | 25 | 0,0045 | 0,0056 | 0,0039 | 0,0005  | 0,00266 |
| 1074 | 1290 | 269 | 426430 4519874 | -2486 | -5,7  | -10,6 | 24 | 0,0051 | 0,0053 | 0,0057 | 0,00038 | 0,00069 |
| 1060 | 1760 | 442 | 426303 4519799 | -3867 | 10,6  | 0,2   | 13 | 0,0046 | 0,0069 | 0,0051 | 6E-05   | 0,00047 |
| 1582 | 1711 | 401 | 425550 4519387 | -4497 | 0     | 13,1  | 30 | 0,004  | 0,006  | 0,0043 | 0,00044 | 0,00205 |
| 1212 | 980  | 369 | 426057 4519472 | -2658 | 14,8  | -6,8  | 11 | 0,0044 | 0,0053 | 0,0068 | 0,00059 | 0,00094 |
| 1960 | 1014 | 437 | 425920 4519344 | -4467 | 2,8   | -18,5 | 28 | 0,0043 | 0,0056 | 0,0038 | 0,00055 | 0,00263 |
| 1868 | 1672 | 226 | 425941 4519597 | -3490 | 5,7   | 19,6  | 28 | 0,0043 | 0,0065 | 0,0058 | 0,00015 | 0,00071 |
| 950  | 1872 | 297 | 426491 4519327 | -4102 | -9,2  | -10,3 | 20 | 0,0048 | 0,005  | 0,0035 | 0,00064 | 0,00279 |
| 1587 | 1158 | 255 | 426182 4519003 | -3871 | 1,8   | -18,5 | 33 | 0,0049 | 0,0052 | 0,0037 | 0,00052 | 0,00252 |
| 1148 | 1772 | 222 | 425986 4519232 | -2581 | -19   | 3,7   | 21 | 0,0046 | 0,0051 | 0,0069 | 0,00065 | 0,00097 |
| 1440 | 1568 | 507 | 425587 4519147 | -4443 | 10,5  | -5,9  | 34 | 0,0042 | 0,006  | 0,005  | 0,00039 | 0,00154 |
| 1836 | 1463 | 333 | 425962 4519886 | -4493 | 14,5  | -18,9 | 40 | 0,0039 | 0,006  | 0,0038 | 0,00051 | 0,0026  |
| 1204 | 1437 | 512 | 425755 4519278 | -4456 | 10,5  | 18,7  | 30 | 0,0043 | 0,0056 | 0,004  | 0,00048 | 0,00247 |
| 1548 | 1177 | 192 | 426046 4519087 | -3340 | -18,5 | 4     | 10 | 0,005  | 0,0052 | 0,0038 | 0,00042 | 0,00235 |
| 946  | 1997 | 399 | 426467 4519842 | -3757 | 11,4  | 19,2  | 15 | 0,0047 | 0,0068 | 0,0048 | 9E-05   | 0,00039 |



|      |      |     |                |       |       |       |    |        |        |        |         |         |
|------|------|-----|----------------|-------|-------|-------|----|--------|--------|--------|---------|---------|
| 1429 | 1253 | 158 | 425773 4519106 | -2131 | 2,2   | -5,6  | 15 | 0,0048 | 0,0051 | 0,007  | 0,00077 | 0,00077 |
| 1907 | 1407 | 160 | 425506 4519939 | -3155 | 17,6  | -1,1  | 32 | 0,0042 | 0,0061 | 0,0047 | 0,00037 | 0,00193 |
| 1326 | 1547 | 390 | 426249 4519567 | -3747 | -17,5 | 11,6  | 17 | 0,0044 | 0,0067 | 0,0054 | 7E-05   | 0,0004  |
| 1250 | 917  | 235 | 425657 4519551 | -2285 | -11,8 | -14,1 | 35 | 0,0045 | 0,0054 | 0,006  | 0,00061 | 0,00083 |
| 817  | 1276 | 267 | 425576 4519002 | -2424 | 9,6   | 6,6   | 26 | 0,0051 | 0,0054 | 0,0058 | 0,00052 | 0,00117 |
| 1140 | 1396 | 199 | 426137 4519821 | -2331 | -15,1 | -15,3 | 23 | 0,0048 | 0,005  | 0,0058 | 0,00044 | 0,00075 |
| 830  | 1937 | 547 | 426100 4519504 | -3880 | -9,8  | -12,3 | 22 | 0,0043 | 0,0066 | 0,0056 | 0,0001  | 0,00048 |
| 963  | 1250 | 205 | 426298 4519322 | -2789 | 16,8  | -5,2  | 32 | 0,0052 | 0,005  | 0,0038 | 0,00032 | 0,00201 |
| 968  | 1967 | 211 | 425892 4519420 | -3643 | -8,5  | 4,4   | 34 | 0,0045 | 0,0054 | 0,0037 | 0,00043 | 0,00255 |
| 879  | 889  | 513 | 426355 4519097 | -3662 | 2,4   | -16,3 | 28 | 0,005  | 0,005  | 0,0037 | 0,00048 | 0,00239 |
| 1061 | 1806 | 464 | 425714 4519534 | -4440 | 15,5  | 9,2   | 30 | 0,004  | 0,0058 | 0,004  | 0,00045 | 0,00237 |
| 1276 | 1094 | 333 | 425870 4519022 | -3784 | -14,2 | -12,8 | 32 | 0,0047 | 0,0053 | 0,004  | 0,00042 | 0,00231 |
| 1119 | 1002 | 469 | 426405 4519071 | -4031 | -10,3 | 4,9   | 31 | 0,0049 | 0,0049 | 0,0036 | 0,00056 | 0,00248 |
| 1369 | 1445 | 217 | 426470 4519538 | -3874 | -7,3  | 5,9   | 38 | 0,0048 | 0,0048 | 0,0035 | 0,00064 | 0,00265 |
| 1443 | 1085 | 231 | 425589 4519608 | -3342 | -6,7  | 16,3  | 26 | 0,0043 | 0,0056 | 0,0041 | 0,0004  | 0,0023  |
| 939  | 959  | 210 | 426265 4519809 | -2439 | -4,5  | -10,6 | 18 | 0,005  | 0,0051 | 0,0039 | 0,00032 | 0,00174 |
| 1594 | 1818 | 160 | 426304 4519463 | -3921 | -19,4 | 16,6  | 25 | 0,0047 | 0,0049 | 0,0035 | 0,00061 | 0,00268 |
| 858  | 1037 | 361 | 425903 4519091 | -2349 | -10,5 | 19,7  | 37 | 0,0046 | 0,0049 | 0,0069 | 0,0007  | 0,00091 |
| 1980 | 1082 | 283 | 425926 4519474 | -3120 | -18,3 | 6,7   | 18 | 0,0043 | 0,0058 | 0,0064 | 0,00019 | 0,00063 |
| 1571 | 1471 | 363 | 426056 4519798 | -3961 | 13    | -19,4 | 23 | 0,0041 | 0,0067 | 0,0051 | 8E-05   | 0,00071 |
| 1451 | 1037 | 333 | 426198 4519319 | -2747 | 0,3   | 6,8   | 11 | 0,0043 | 0,0052 | 0,007  | 0,0004  | 0,00088 |

|      |      |     |                |       |       |       |    |        |        |        |         |         |
|------|------|-----|----------------|-------|-------|-------|----|--------|--------|--------|---------|---------|
| 1145 | 1680 | 203 | 425547 4519498 | -3349 | -2,2  | 17,6  | 33 | 0,0043 | 0,0056 | 0,0042 | 0,00038 | 0,00219 |
| 1971 | 1103 | 160 | 425908 4519134 | -2222 | -1,6  | -2,9  | 27 | 0,0045 | 0,0048 | 0,0076 | 0,00062 | 0,00095 |
| 904  | 1501 | 301 | 425792 4519710 | -3694 | -6,4  | 14,3  | 30 | 0,0043 | 0,0054 | 0,0038 | 0,00044 | 0,00246 |
| 999  | 1980 | 174 | 425754 4519873 | -3279 | -1,2  | 11,6  | 37 | 0,0042 | 0,0056 | 0,0038 | 0,00037 | 0,00243 |
| 1630 | 1150 | 288 | 425649 4519774 | -3233 | 12,4  | 16,4  | 39 | 0,0042 | 0,006  | 0,0057 | 0,0003  | 0,00109 |
| 1190 | 1642 | 183 | 425854 4519958 | -3477 | -11,8 | -17,6 | 15 | 0,0042 | 0,0054 | 0,0038 | 0,00043 | 0,00257 |
| 1874 | 1070 | 181 | 426351 4519484 | -3513 | 8,2   | 9,7   | 17 | 0,0047 | 0,0049 | 0,0037 | 0,00054 | 0,0025  |
| 1506 | 1168 | 341 | 425843 4519054 | -4087 | -17,2 | -10,5 | 22 | 0,0046 | 0,0051 | 0,004  | 0,00045 | 0,00229 |
| 1779 | 852  | 476 | 425791 4519540 | -4257 | 18,7  | 14,9  | 32 | 0,0041 | 0,0055 | 0,0042 | 0,00045 | 0,00226 |
| 840  | 1633 | 280 | 425732 4519708 | -3508 | -5,9  | 11,8  | 29 | 0,0042 | 0,0055 | 0,0039 | 0,00038 | 0,00232 |
| 1735 | 1371 | 278 | 425531 4519555 | -3575 | -13,3 | -6,8  | 10 | 0,0041 | 0,0059 | 0,0055 | 0,00026 | 0,00089 |
| 1903 | 915  | 429 | 425634 4519702 | -4348 | -13,3 | 6,9   | 40 | 0,004  | 0,0055 | 0,0039 | 0,0005  | 0,00238 |
| 1798 | 1912 | 223 | 426182 4519231 | -3510 | -16,4 | -17,2 | 31 | 0,0041 | 0,0061 | 0,006  | 0,00013 | 0,00037 |
| 1165 | 1390 | 252 | 425520 4519993 | -3286 | 3,9   | 0,4   | 34 | 0,0039 | 0,0059 | 0,0044 | 0,00033 | 0,00191 |
| 834  | 1805 | 357 | 426276 4519748 | -4118 | 10,8  | 1,2   | 15 | 0,0043 | 0,005  | 0,0035 | 0,00053 | 0,00265 |
| 1296 | 1398 | 438 | 426195 4519135 | -3575 | 2,3   | -14,4 | 20 | 0,004  | 0,0059 | 0,0065 | 0,00018 | 0,00045 |
| 1155 | 1202 | 319 | 426470 4519098 | -3780 | 14,2  | 6,8   | 26 | 0,0048 | 0,0047 | 0,0036 | 0,0005  | 0,00231 |
| 1467 | 952  | 218 | 426332 4519808 | -3267 | 3,2   | -2,1  | 29 | 0,0046 | 0,0048 | 0,0037 | 0,0005  | 0,00242 |
| 837  | 801  | 304 | 425968 4519660 | -2424 | -4,9  | -13,3 | 19 | 0,0048 | 0,0052 | 0,0043 | 0,00025 | 0,00131 |
| 1031 | 1370 | 190 | 426377 4519867 | -3029 | 16,7  | -9,7  | 35 | 0,0046 | 0,0048 | 0,0037 | 0,00043 | 0,00236 |
| 957  | 1840 | 492 | 425663 4519365 | -4374 | 3,7   | -9,3  | 26 | 0,004  | 0,0055 | 0,0041 | 0,0004  | 0,00215 |

|      |      |     |                |       |       |       |    |        |        |        |         |         |
|------|------|-----|----------------|-------|-------|-------|----|--------|--------|--------|---------|---------|
| 861  | 1954 | 361 | 426209 4519697 | -4214 | -8,1  | -11,4 | 28 | 0,0043 | 0,005  | 0,0036 | 0,00052 | 0,00262 |
| 1431 | 1313 | 515 | 426330 4519618 | -4088 | 9,1   | -15,4 | 23 | 0,004  | 0,0065 | 0,0052 | 5E-05   | 0,00038 |
| 1112 | 1185 | 500 | 425746 4519798 | -3647 | -18,6 | 8,8   | 26 | 0,0041 | 0,0061 | 0,0053 | 0,00016 | 0,00082 |
| 1195 | 850  | 316 | 425556 4519478 | -2535 | 11,8  | 0,1   | 17 | 0,0044 | 0,0052 | 0,0061 | 0,0006  | 0,00098 |
| 1656 | 1037 | 338 | 426473 4519524 | -4172 | 8,1   | 11,8  | 14 | 0,0045 | 0,0048 | 0,0036 | 0,00059 | 0,0025  |
| 1980 | 1000 | 300 | 426100 4519300 | -3000 | -7    | 5     | 12 | 0,0041 | 0,0055 | 0,0068 | 0,00021 | 0,00058 |
| 1500 | 1000 | 300 | 426292 4519300 | -2616 | -3,2  | 5     | 31 | 0,0043 | 0,0049 | 0,0067 | 0,00033 | 0,00088 |
| 968  | 1694 | 401 | 425765 4519840 | -4208 | -3,7  | -8,1  | 23 | 0,0039 | 0,0055 | 0,0038 | 0,00042 | 0,00234 |
| 1445 | 1029 | 410 | 425800 4519889 | -4194 | -16,9 | 11,1  | 39 | 0,004  | 0,0053 | 0,0038 | 0,00047 | 0,00243 |
| 1374 | 856  | 384 | 425836 4519174 | -3693 | 4,3   | 16,1  | 38 | 0,0044 | 0,0051 | 0,0041 | 0,00038 | 0,00211 |
| 1984 | 1096 | 209 | 425672 4519088 | -3603 | -17,3 | -14,1 | 23 | 0,0045 | 0,0051 | 0,0042 | 0,00038 | 0,00196 |
| 1522 | 1226 | 542 | 425649 4519922 | -4440 | -14,2 | 17,9  | 26 | 0,0035 | 0,0061 | 0,0043 | 0,00028 | 0,00155 |
| 911  | 1816 | 191 | 426015 4519062 | -2974 | -10,5 | 0,6   | 18 | 0,0048 | 0,005  | 0,004  | 0,00025 | 0,00191 |
| 1427 | 1580 | 246 | 426494 4519315 | -2927 | -8,4  | 7,3   | 22 | 0,0043 | 0,0055 | 0,0059 | 0,00021 | 0,00047 |
| 868  | 901  | 311 | 425877 4519764 | -2309 | 3,8   | -13,9 | 16 | 0,0044 | 0,0051 | 0,0053 | 0,00041 | 0,00073 |
| 1443 | 804  | 318 | 425958 4519743 | -3535 | -4,5  | 13,4  | 36 | 0,0043 | 0,0051 | 0,0039 | 0,00043 | 0,00232 |
| 822  | 1185 | 407 | 426365 4519536 | -3706 | 5,3   | -17,4 | 22 | 0,0046 | 0,0047 | 0,0036 | 0,00049 | 0,00235 |
| 1578 | 1503 | 351 | 426466 4519238 | -4417 | 0,6   | 14,4  | 38 | 0,0043 | 0,0049 | 0,0037 | 0,00056 | 0,00239 |
| 1002 | 983  | 388 | 426281 4519095 | -2479 | -4,6  | 17,9  | 38 | 0,0045 | 0,0044 | 0,0067 | 0,00045 | 0,00105 |
| 1524 | 803  | 527 | 426470 4519074 | -3188 | -4,8  | -12,3 | 16 | 0,004  | 0,0055 | 0,0066 | 0,00019 | 0,00049 |
| 945  | 817  | 522 | 426296 4519657 | -3756 | -3,8  | -4,7  | 37 | 0,0045 | 0,0047 | 0,0036 | 0,00049 | 0,00236 |

|      |      |     |                |       |       |       |    |        |        |        |         |         |         |
|------|------|-----|----------------|-------|-------|-------|----|--------|--------|--------|---------|---------|---------|
| 1460 | 1560 | 468 | 426190 4519507 | -4186 | 14,4  | 19,7  | 28 | 0,0038 | 0,0063 | 0,0053 | 8E-05   | 0,00047 |         |
| 1728 | 1367 | 338 | 426422 4519548 | -3806 | -15,6 | 1     | 25 | 0,0042 | 0,0062 | 0,0051 | 0,00011 |         | 0,00024 |
| 1058 | 1377 | 445 | 425875 4519026 | -3166 | 7,6   | 0     | 21 | 0,0043 | 0,0049 | 0,0074 | 0,00052 |         | 0,00059 |
| 1082 | 1329 | 186 | 426251 4519242 | -2169 | -16,9 | -4,5  | 29 | 0,0049 | 0,0043 | 0,0055 | 0,00036 |         | 0,00083 |
| 830  | 1214 | 509 | 426232 4519178 | -3960 | 12    | 18,8  | 35 | 0,0045 | 0,0048 | 0,0037 | 0,00043 |         | 0,00223 |
| 1064 | 1519 | 207 | 425915 4519546 | -2426 | 15,6  | 6,3   | 15 | 0,0043 | 0,0049 | 0,006  | 0,00055 |         | 0,00065 |
| 1686 | 1368 | 322 | 425711 4519016 | -3598 | 16,9  | -6,8  | 26 | 0,0043 | 0,0051 | 0,0066 | 0,00039 |         | 0,00073 |
| 1088 | 1880 | 247 | 426331 4519959 | -4035 | -7,6  | -15,9 | 40 | 0,0043 | 0,0048 | 0,0036 | 0,00054 |         | 0,00252 |
| 977  | 1000 | 300 | 426100 4519300 | -3000 | -20   | 5     | 35 | 0,0047 | 0,0049 | 0,0039 | 0,00027 |         | 0,00182 |
| 1826 | 1494 | 165 | 426275 4519737 | -3850 | -14,6 | 6,6   | 35 | 0,0044 | 0,0046 | 0,0036 | 0,00058 |         | 0,00243 |
| 1097 | 1321 | 530 | 426345 4519331 | -3628 | -4    | 13,6  | 29 | 0,004  | 0,0059 | 0,0058 | 0,0001  | 0,00032 |         |
| 1770 | 1169 | 257 | 425769 4519340 | -3898 | 7,7   | 15,4  | 35 | 0,0041 | 0,0052 | 0,0042 | 0,00041 |         | 0,00207 |
| 921  | 1787 | 513 | 426213 4519196 | -3750 | -17,8 | 15,4  | 14 | 0,0039 | 0,0059 | 0,0058 | 0,00013 |         | 0,00035 |
| 1743 | 1754 | 289 | 426470 4519688 | -4468 | -2,8  | -19,5 | 28 | 0,0041 | 0,005  | 0,0036 | 0,00058 |         | 0,00237 |
| 1076 | 1692 | 391 | 425593 4519092 | -4078 | 11,8  | 4,3   | 21 | 0,0041 | 0,0053 | 0,0046 | 0,00037 |         | 0,00173 |
| 916  | 1587 | 494 | 426235 4519738 | -4358 | 19,8  | -5    | 32 | 0,004  | 0,005  | 0,0037 | 0,00048 |         | 0,00247 |
| 1694 | 1013 | 457 | 426486 4519912 | -3892 | 14,9  | 10,3  | 31 | 0,0043 | 0,0063 | 0,005  | 7E-05   | 0,00039 |         |
| 1037 | 1607 | 371 | 425845 4519161 | -4099 | -11,7 | -9,5  | 38 | 0,0043 | 0,005  | 0,004  | 0,00039 |         | 0,00214 |
| 1968 | 1181 | 241 | 426381 4519632 | -4104 | -19,8 | -4,4  | 17 | 0,0045 | 0,0045 | 0,0036 | 0,00066 |         | 0,00231 |
| 1468 | 1999 | 172 | 425804 4519090 | -3798 | -15   | 6,4   | 16 | 0,0043 | 0,005  | 0,004  | 0,00037 |         | 0,00209 |
| 1901 | 1195 | 395 | 426121 4519275 | -4446 | 17,4  | -4,5  | 23 | 0,0039 | 0,0052 | 0,0041 | 0,00042 |         | 0,00211 |

|      |      |     |                |       |       |       |    |        |        |        |         |         |
|------|------|-----|----------------|-------|-------|-------|----|--------|--------|--------|---------|---------|
| 1803 | 1703 | 265 | 425842 4519168 | -3761 | 13,9  | 5,6   | 11 | 0,004  | 0,0055 | 0,006  | 0,00025 | 0,00066 |
| 1977 | 1395 | 460 | 426443 4519486 | -4438 | -0,1  | 1,4   | 26 | 0,0036 | 0,0062 | 0,0047 | 0,00018 | 0,00057 |
| 1760 | 1130 | 470 | 426082 4519026 | -3908 | 9,7   | -19,4 | 18 | 0,0039 | 0,0056 | 0,0064 | 0,00018 | 0,00043 |
| 1290 | 817  | 265 | 426318 4519822 | -3047 | 11,6  | 12,4  | 15 | 0,0046 | 0,0046 | 0,0038 | 0,00039 | 0,00211 |
| 904  | 1549 | 418 | 426066 4519250 | -4088 | 10,8  | 6,4   | 31 | 0,0043 | 0,0049 | 0,0038 | 0,0004  | 0,00221 |
| 1180 | 1067 | 415 | 425778 4519877 | -3269 | 7,6   | 4,7   | 12 | 0,0041 | 0,0057 | 0,0053 | 0,00019 | 0,00088 |
| 1353 | 1481 | 480 | 426114 4519196 | -3982 | 2,5   | 14,2  | 26 | 0,0038 | 0,0059 | 0,0059 | 0,00012 | 0,00037 |
| 1372 | 982  | 491 | 425650 4519846 | -4170 | -11,3 | -2,1  | 29 | 0,0037 | 0,0054 | 0,004  | 0,00039 | 0,00204 |
| 1482 | 1016 | 381 | 425902 4519242 | -4037 | -10,6 | -13,9 | 32 | 0,0043 | 0,0049 | 0,004  | 0,00041 | 0,00208 |
| 1695 | 924  | 277 | 425514 4519824 | -3339 | 0,7   | -5,2  | 12 | 0,0038 | 0,0055 | 0,0045 | 0,00033 | 0,00167 |
| 1726 | 1742 | 418 | 426254 4519257 | -4355 | -0,9  | 19,8  | 14 | 0,0035 | 0,0061 | 0,0051 | 0,00011 | 0,00044 |
| 1513 | 1916 | 348 | 425683 4519155 | -4328 | 2,3   | 9,8   | 29 | 0,0038 | 0,0054 | 0,0047 | 0,00032 | 0,00142 |
| 1357 | 1978 | 266 | 425673 4519449 | -3756 | 13,8  | -18,1 | 12 | 0,0039 | 0,0057 | 0,0053 | 0,00023 | 0,00094 |
| 1074 | 1222 | 359 | 425939 4519730 | -3885 | 0,6   | 12,2  | 22 | 0,004  | 0,005  | 0,0038 | 0,00041 | 0,00222 |
| 971  | 994  | 311 | 426455 4519477 | -2343 | 15,3  | 7,8   | 31 | 0,0047 | 0,0041 | 0,0055 | 0,00032 | 0,0008  |
| 1522 | 1181 | 187 | 425641 4519981 | -2733 | 6,6   | -9,7  | 15 | 0,004  | 0,0054 | 0,0049 | 0,00028 | 0,0014  |
| 1556 | 1435 | 275 | 426181 4519426 | -4174 | -10,9 | 8,9   | 10 | 0,0043 | 0,0047 | 0,0037 | 0,00051 | 0,00228 |
| 1359 | 1382 | 381 | 426415 4519341 | -3495 | 10,7  | 13,4  | 12 | 0,004  | 0,0058 | 0,0058 | 9E-05   | 0,0003  |
| 1067 | 1306 | 171 | 426422 4519188 | -2531 | -10,5 | -6,8  | 15 | 0,0051 | 0,0044 | 0,0039 | 0,00024 | 0,0013  |
| 1489 | 1236 | 329 | 425976 4519144 | -3043 | -7,4  | -6,1  | 36 | 0,0041 | 0,0049 | 0,0071 | 0,00036 | 0,00055 |
| 1708 | 935  | 542 | 426017 4519149 | -4386 | 16,5  | -7,1  | 33 | 0,004  | 0,0051 | 0,0043 | 0,00038 | 0,00194 |

|      |      |     |                |       |       |       |    |        |        |        |         |         |         |
|------|------|-----|----------------|-------|-------|-------|----|--------|--------|--------|---------|---------|---------|
| 1289 | 1912 | 194 | 426269 4519369 | -2699 | -17,1 | 9,1   | 23 | 0,0044 | 0,0049 | 0,0059 | 0,0003  | 0,00052 |         |
| 1145 | 1148 | 368 | 425780 4519203 | -2803 | -13,2 | -1,3  | 31 | 0,0042 | 0,0046 | 0,0071 | 0,00056 |         | 0,00063 |
| 1538 | 1716 | 401 | 426449 4519235 | -4116 | 18,3  | 8     | 26 | 0,0037 | 0,006  | 0,0055 | 8E-05   | 0,00029 |         |
| 896  | 1326 | 356 | 425680 4519940 | -3070 | 16,5  | 11,1  | 23 | 0,004  | 0,0056 | 0,005  | 0,00024 |         | 0,00116 |
| 1751 | 964  | 216 | 425737 4519043 | -3032 | -1,6  | 5,9   | 16 | 0,0046 | 0,0048 | 0,0047 | 0,00027 |         | 0,00161 |
| 1169 | 814  | 476 | 426367 4519185 | -2691 | -4,1  | 8,5   | 18 | 0,0042 | 0,0045 | 0,0066 | 0,00032 |         | 0,00081 |
| 846  | 1261 | 417 | 425886 4519450 | -3709 | 14,9  | -9,6  | 24 | 0,0042 | 0,0049 | 0,004  | 0,00034 |         | 0,00203 |
| 1066 | 1400 | 205 | 425582 4519348 | -2688 | -14   | -0,8  | 24 | 0,0044 | 0,0051 | 0,005  | 0,00029 |         | 0,00123 |
| 1382 | 1626 | 255 | 426246 4519897 | -3295 | 4,5   | -17,3 | 26 | 0,0043 | 0,0059 | 0,0052 | 6E-05   | 0,00042 |         |
| 1867 | 1305 | 179 | 426293 4519856 | -2673 | -12,3 | -11,6 | 23 | 0,0045 | 0,0052 | 0,0056 | 0,00014 |         | 0,00036 |
| 1467 | 1261 | 297 | 426067 4519333 | -2967 | -19,7 | 5,3   | 32 | 0,0041 | 0,005  | 0,0064 | 0,00025 |         | 0,00052 |
| 946  | 1959 | 174 | 426402 4519476 | -3153 | -10,1 | -12,6 | 26 | 0,0046 | 0,0043 | 0,0037 | 0,00037 |         | 0,00205 |
| 1154 | 1704 | 437 | 425537 4519255 | -4181 | -9,3  | -17,9 | 31 | 0,0038 | 0,0053 | 0,0049 | 0,0003  | 0,0013  |         |
| 1377 | 1197 | 238 | 426415 4519193 | -3496 | 10,3  | 16,6  | 23 | 0,0046 | 0,0044 | 0,0038 | 0,00041 |         | 0,00196 |
| 1623 | 983  | 399 | 426065 4519289 | -4173 | -16,9 | 10,9  | 35 | 0,0042 | 0,0046 | 0,0038 | 0,00045 |         | 0,00209 |
| 1832 | 1722 | 312 | 425703 4519813 | -4299 | -14,1 | -5,2  | 36 | 0,0034 | 0,006  | 0,0044 | 0,00019 |         | 0,00104 |
| 872  | 845  | 370 | 425717 4519476 | -2538 | 0,5   | -13,8 | 18 | 0,0044 | 0,0049 | 0,0051 | 0,00033 |         | 0,00093 |
| 1587 | 1395 | 334 | 426062 4519426 | -3628 | -1    | 4     | 33 | 0,0038 | 0,0057 | 0,0057 | 9E-05   | 0,0004  |         |
| 841  | 1924 | 329 | 426052 4519957 | -3999 | 10,1  | 11,5  | 37 | 0,0038 | 0,0051 | 0,0037 | 0,00039 |         | 0,00219 |
| 1541 | 1236 | 262 | 426285 4519873 | -3985 | 7,2   | 1,9   | 28 | 0,0041 | 0,0047 | 0,0037 | 0,00049 |         | 0,00224 |
| 1960 | 1712 | 184 | 425916 4519767 | -3472 | 6,5   | -19,5 | 11 | 0,0039 | 0,0058 | 0,0051 | 0,0001  | 0,00075 |         |

|      |      |     |                |       |       |       |    |        |        |        |         |         |
|------|------|-----|----------------|-------|-------|-------|----|--------|--------|--------|---------|---------|
| 1944 | 1324 | 416 | 425780 4519024 | -4345 | 1,1   | 9,1   | 36 | 0,0038 | 0,0052 | 0,005  | 0,00029 | 0,00116 |
| 1020 | 1000 | 300 | 426100 4519300 | -3000 | -7    | 5     | 15 | 0,0046 | 0,0046 | 0,004  | 0,00024 | 0,00165 |
| 1830 | 1583 | 293 | 426300 4519836 | -4410 | 12,9  | 14,4  | 11 | 0,0037 | 0,0051 | 0,0038 | 0,00043 | 0,0021  |
| 1268 | 1881 | 362 | 425679 4519046 | -3916 | -14,8 | -16,7 | 31 | 0,004  | 0,0052 | 0,0059 | 0,00024 | 0,0006  |
| 1541 | 1931 | 202 | 426024 4519627 | -3297 | 14,8  | -18,1 | 37 | 0,004  | 0,0057 | 0,0055 | 0,00011 | 0,00056 |
| 877  | 1610 | 472 | 426117 4519814 | -4239 | 9,2   | -2,5  | 21 | 0,0038 | 0,0049 | 0,0037 | 0,0004  | 0,00219 |
| 872  | 1300 | 269 | 425756 4519685 | -2856 | 19,1  | 10,6  | 20 | 0,0042 | 0,005  | 0,0045 | 0,00026 | 0,00148 |
| 1187 | 1121 | 376 | 426299 4519641 | -3978 | 2     | 16,2  | 19 | 0,0042 | 0,0045 | 0,0037 | 0,00046 | 0,00214 |
| 1025 | 1983 | 157 | 426466 4519519 | -3101 | -13,8 | -8,9  | 16 | 0,0046 | 0,0041 | 0,0036 | 0,00038 | 0,00199 |
| 1572 | 1533 | 452 | 425656 4519016 | -4370 | -12,5 | -9,1  | 26 | 0,0038 | 0,0052 | 0,005  | 0,00028 | 0,00112 |
| 983  | 1999 | 299 | 425834 4519241 | -3132 | 14,3  | 12,1  | 30 | 0,0041 | 0,005  | 0,0062 | 0,00036 | 0,00055 |
| 1433 | 800  | 287 | 425965 4519435 | -3153 | -18,7 | 6,3   | 33 | 0,0044 | 0,0046 | 0,004  | 0,00028 | 0,00173 |
| 1017 | 1330 | 260 | 426009 4519347 | -3232 | 5,6   | 19    | 21 | 0,0044 | 0,0047 | 0,004  | 0,00027 | 0,00179 |
| 907  | 1655 | 478 | 426274 4519941 | -3822 | 2,2   | -16,4 | 15 | 0,0041 | 0,006  | 0,0049 | 6E-05   | 0,00045 |
| 1876 | 1182 | 195 | 425502 4519677 | -2907 | -10,4 | -13,5 | 38 | 0,004  | 0,0051 | 0,0054 | 0,00028 | 0,00086 |
| 954  | 1440 | 206 | 426169 4519121 | -2260 | 16,5  | -14,5 | 17 | 0,0046 | 0,0042 | 0,0058 | 0,00036 | 0,0006  |
| 1500 | 1000 | 300 | 425500 4519300 | -3000 | 5     | 5     | 38 | 0,0042 | 0,0048 | 0,0059 | 0,00039 | 0,001   |
| 1553 | 1471 | 268 | 425626 4519109 | -3395 | 19,1  | -14,4 | 14 | 0,0042 | 0,0048 | 0,0061 | 0,00038 | 0,00084 |
| 1252 | 1659 | 293 | 425569 4519670 | -3908 | -11,2 | -6,7  | 33 | 0,0036 | 0,0054 | 0,0044 | 0,00028 | 0,00154 |
| 1358 | 1715 | 249 | 425931 4519141 | -3987 | -19,6 | -5,5  | 36 | 0,0042 | 0,0047 | 0,004  | 0,00035 | 0,00192 |
| 942  | 1987 | 229 | 425627 4519148 | -2681 | -7,6  | -6,1  | 34 | 0,0043 | 0,0046 | 0,0064 | 0,00056 | 0,00062 |

|      |      |     |                |       |       |      |    |        |        |        |         |         |
|------|------|-----|----------------|-------|-------|------|----|--------|--------|--------|---------|---------|
| 1600 | 986  | 388 | 425757 4519731 | -3990 | 11,6  | -2,1 | 23 | 0,0036 | 0,0052 | 0,0042 | 0,00034 | 0,00171 |
| 876  | 1020 | 272 | 425891 4519577 | -2528 | -18,1 | -0,8 | 17 | 0,0044 | 0,0048 | 0,0045 | 0,0002  | 0,00101 |
| 1772 | 1415 | 472 | 426339 4519148 | -4339 | -16,9 | -5,3 | 27 | 0,0035 | 0,0057 | 0,005  | 0,00018 | 0,00036 |
| 1031 | 1943 | 187 | 425555 4519566 | -2761 | -9    | -9,4 | 38 | 0,004  | 0,0051 | 0,0053 | 0,00031 | 0,00106 |
| 1060 | 1439 | 212 | 425685 4519096 | -2541 | 7     | 19,5 | 30 | 0,0045 | 0,0046 | 0,0057 | 0,00038 | 0,00079 |
| 1392 | 1624 | 289 | 426320 4519994 | -3683 | -5,1  | 11,1 | 19 | 0,0042 | 0,0059 | 0,0047 | 8E-05   | 0,00045 |
| 1025 | 1659 | 251 | 425648 4519835 | -3325 | 1     | 13,7 | 18 | 0,0037 | 0,0053 | 0,0043 | 0,00025 | 0,00153 |
| 1612 | 1097 | 177 | 425745 4519615 | -2399 | 0,1   | 18,7 | 15 | 0,0041 | 0,0047 | 0,0059 | 0,00039 | 0,00063 |
| 1742 | 952  | 409 | 425884 4519985 | -4204 | -9,4  | 4,7  | 19 | 0,0036 | 0,0051 | 0,0039 | 0,0004  | 0,00194 |
| 1156 | 1342 | 452 | 426298 4519531 | -4279 | 5,7   | -8,1 | 32 | 0,004  | 0,0046 | 0,0037 | 0,00044 | 0,00209 |
| 953  | 1358 | 296 | 426015 4519249 | -2535 | 4     | -1,4 | 24 | 0,0042 | 0,0042 | 0,0065 | 0,00048 | 0,00055 |
| 1511 | 896  | 194 | 426159 4519236 | -2255 | -18,8 | 15,7 | 37 | 0,0047 | 0,0041 | 0,0053 | 0,00022 | 0,00057 |
| 1430 | 1605 | 499 | 426156 4519726 | -4472 | 16,1  | 11,5 | 29 | 0,0033 | 0,0057 | 0,0044 | 0,00017 | 0,00105 |
| 1706 | 1966 | 248 | 426486 4519615 | -4354 | 2     | 6,9  | 35 | 0,0039 | 0,0047 | 0,0037 | 0,00049 | 0,00201 |
| 812  | 1005 | 485 | 425864 4519772 | -3507 | -17,2 | 5,1  | 18 | 0,0039 | 0,0048 | 0,004  | 0,00029 | 0,00183 |
| 1861 | 1163 | 463 | 426207 4519615 | -4496 | 3     | 18,6 | 33 | 0,0036 | 0,005  | 0,004  | 0,00037 | 0,00178 |
| 1347 | 856  | 255 | 426368 4519157 | -2294 | 7,6   | 0,6  | 26 | 0,0046 | 0,0039 | 0,0058 | 0,00023 | 0,00068 |
| 1062 | 1901 | 218 | 426089 4519622 | -2725 | -10,8 | 11,6 | 14 | 0,0042 | 0,0048 | 0,0055 | 0,00024 | 0,0004  |
| 1988 | 1877 | 251 | 426065 4519187 | -4353 | -2    | -16  | 15 | 0,0037 | 0,0048 | 0,0041 | 0,00037 | 0,00169 |
| 1145 | 907  | 462 | 426095 4519443 | -2855 | -6,1  | 17,8 | 20 | 0,004  | 0,0046 | 0,0063 | 0,00028 | 0,00047 |
| 1473 | 1534 | 248 | 426438 4519746 | -4061 | -9,5  | 2,5  | 18 | 0,0041 | 0,0043 | 0,0037 | 0,00052 | 0,00202 |



|      |      |     |                |       |       |       |    |        |        |        |         |         |
|------|------|-----|----------------|-------|-------|-------|----|--------|--------|--------|---------|---------|
| 968  | 1079 | 396 | 425688 4519722 | -2922 | -17,7 | 10,4  | 26 | 0,0039 | 0,005  | 0,0054 | 0,00027 | 0,00076 |
| 938  | 1620 | 285 | 425707 4519851 | -3473 | -18,7 | -3,1  | 27 | 0,0037 | 0,0051 | 0,0042 | 0,00024 | 0,00164 |
| 1075 | 1119 | 428 | 425678 4519770 | -3702 | 12,9  | 19,8  | 33 | 0,0036 | 0,0052 | 0,0044 | 0,00027 | 0,00152 |
| 1957 | 1279 | 256 | 426090 4519058 | -3990 | 19    | 18,4  | 25 | 0,0041 | 0,0046 | 0,0044 | 0,00032 | 0,0017  |
| 1594 | 1603 | 204 | 426141 4519808 | -3064 | -19,3 | -7    | 31 | 0,0041 | 0,0054 | 0,0053 | 8E-05   | 0,0003  |
| 844  | 1567 | 388 | 425716 4519066 | -3636 | 3,7   | -5,7  | 29 | 0,0041 | 0,0047 | 0,0046 | 0,00026 | 0,00152 |
| 1139 | 1268 | 209 | 425812 4519966 | -2758 | 1,4   | -15,9 | 17 | 0,0039 | 0,0049 | 0,0046 | 0,00021 | 0,00133 |
| 1624 | 1352 | 357 | 425674 4519332 | -4159 | -3,7  | -0,3  | 38 | 0,0036 | 0,005  | 0,0045 | 0,0003  | 0,00138 |
| 884  | 1301 | 394 | 425654 4519192 | -3353 | 13,3  | 10,2  | 17 | 0,0041 | 0,0047 | 0,0048 | 0,00026 | 0,00137 |
| 851  | 1091 | 544 | 425735 4519024 | -2930 | 6,2   | -7,5  | 33 | 0,0042 | 0,0042 | 0,0071 | 0,00055 | 0,00049 |
| 1700 | 810  | 211 | 426438 4519494 | -2257 | 2,7   | -14,7 | 20 | 0,0045 | 0,0038 | 0,0055 | 0,00018 | 0,00051 |
| 1087 | 1868 | 245 | 425682 4519235 | -3569 | 7,6   | -13   | 14 | 0,0039 | 0,0048 | 0,0045 | 0,00026 | 0,00154 |
| 922  | 1230 | 433 | 425528 4519277 | -3373 | -19,7 | -16,8 | 36 | 0,004  | 0,0048 | 0,0052 | 0,00028 | 0,00115 |
| 1978 | 1980 | 218 | 425730 4519097 | -4188 | -6,2  | 8,6   | 21 | 0,0037 | 0,0049 | 0,0045 | 0,0003  | 0,00135 |
| 1509 | 1062 | 230 | 425676 4519458 | -3110 | -12,7 | 11,8  | 16 | 0,004  | 0,0047 | 0,0045 | 0,00023 | 0,00143 |
| 831  | 2000 | 323 | 425719 4519656 | -3722 | 15,8  | 5,2   | 19 | 0,0036 | 0,0051 | 0,0042 | 0,00024 | 0,0015  |
| 1691 | 1969 | 268 | 426312 4519756 | -4113 | 3,6   | 16    | 25 | 0,0036 | 0,0058 | 0,0045 | 0,0001  | 0,00055 |
| 1992 | 1680 | 201 | 425544 4519657 | -3854 | -17,3 | -0,3  | 15 | 0,0034 | 0,0053 | 0,0046 | 0,0002  | 0,00102 |
| 1475 | 1304 | 322 | 425890 4519811 | -3635 | 10,6  | 7     | 26 | 0,0036 | 0,0055 | 0,005  | 0,00011 | 0,00076 |
| 1765 | 1098 | 333 | 425755 4519921 | -3854 | -11,1 | 18,1  | 18 | 0,0035 | 0,0055 | 0,0046 | 0,00015 | 0,00101 |
| 859  | 1571 | 162 | 426351 4519452 | -2219 | 16,6  | 9,5   | 38 | 0,0048 | 0,004  | 0,0044 | 0,00017 | 0,00056 |

|      |      |     |                |       |       |       |    |        |        |        |         |         |
|------|------|-----|----------------|-------|-------|-------|----|--------|--------|--------|---------|---------|
| 1412 | 1874 | 169 | 425940 4519890 | -2920 | 8,4   | -6,8  | 21 | 0,004  | 0,0052 | 0,0052 | 0,00013 | 0,00071 |
| 1884 | 1000 | 300 | 426292 4519300 | -3000 | -3,2  | 5     | 23 | 0,0038 | 0,0049 | 0,0064 | 0,0001  | 0,00031 |
| 1440 | 1947 | 329 | 426080 4519208 | -3994 | -11,8 | 14,5  | 39 | 0,0035 | 0,0055 | 0,0053 | 8E-05   | 0,00031 |
| 1651 | 1920 | 278 | 426052 4519463 | -4348 | -6,3  | 3,6   | 37 | 0,0036 | 0,0048 | 0,0039 | 0,00035 | 0,0017  |
| 1900 | 1090 | 309 | 426439 4519589 | -3466 | -7,3  | 14,5  | 18 | 0,004  | 0,0054 | 0,0053 | 8E-05   | 0,00017 |
| 1521 | 1608 | 380 | 425729 4519554 | -4186 | -18,6 | -14,5 | 31 | 0,0034 | 0,0054 | 0,0048 | 0,00014 | 0,00075 |
| 1886 | 1078 | 236 | 425681 4519617 | -3093 | 7,8   | 7,5   | 31 | 0,0037 | 0,0049 | 0,0055 | 0,00023 | 0,00087 |
| 1552 | 1099 | 257 | 426239 4519701 | -3701 | 2,2   | -10,1 | 39 | 0,004  | 0,0043 | 0,0038 | 0,00039 | 0,00183 |
| 1446 | 800  | 287 | 425974 4519426 | -3088 | -18,7 | 6,3   | 16 | 0,0042 | 0,0044 | 0,0042 | 0,00022 | 0,00145 |
| 1417 | 1846 | 241 | 425844 4519556 | -3519 | -0,7  | 14,5  | 16 | 0,0036 | 0,0053 | 0,0051 | 0,00012 | 0,0006  |
| 1442 | 1413 | 172 | 425567 4519428 | -2851 | -19,7 | -4,6  | 37 | 0,004  | 0,0046 | 0,0049 | 0,00023 | 0,00101 |
| 1008 | 1169 | 300 | 425960 4519752 | -3247 | -17,5 | -4    | 25 | 0,0039 | 0,0045 | 0,0041 | 0,00024 | 0,00162 |
| 1214 | 1957 | 199 | 425850 4519831 | -3039 | -13,9 | -12   | 37 | 0,0039 | 0,0051 | 0,0051 | 0,00012 | 0,00065 |
| 1893 | 875  | 156 | 425893 4519664 | -2504 | 2,9   | -12,9 | 27 | 0,0042 | 0,0045 | 0,0046 | 0,00019 | 0,00107 |
| 1907 | 966  | 479 | 426260 4519547 | -4048 | -4,7  | 7,4   | 38 | 0,0035 | 0,0055 | 0,005  | 8E-05   | 0,00031 |
| 1277 | 887  | 450 | 425865 4519796 | -3215 | -6,9  | -0,5  | 32 | 0,0038 | 0,0051 | 0,0054 | 0,00013 | 0,00059 |
| 813  | 1929 | 429 | 426328 4519609 | -4196 | -3,1  | -8,7  | 17 | 0,0038 | 0,0044 | 0,0038 | 0,00038 | 0,00189 |
| 1257 | 943  | 547 | 425866 4519988 | -3924 | 7     | 12,9  | 38 | 0,0034 | 0,0054 | 0,0045 | 0,00017 | 0,00112 |
| 1768 | 986  | 222 | 425700 4519437 | -3017 | 10,2  | -13,1 | 23 | 0,0039 | 0,0046 | 0,0049 | 0,00026 | 0,00122 |
| 1315 | 1732 | 345 | 426354 4519477 | -3817 | 15,5  | 1,7   | 21 | 0,0037 | 0,0055 | 0,0051 | 4E-05   | 0,00024 |
| 1293 | 1607 | 179 | 426370 4519317 | -3315 | 19,5  | 1,6   | 11 | 0,0043 | 0,004  | 0,0039 | 0,00029 | 0,00167 |

|      |      |     |                |       |       |       |    |        |        |        |         |         |
|------|------|-----|----------------|-------|-------|-------|----|--------|--------|--------|---------|---------|
| 939  | 1150 | 302 | 425882 4519717 | -2608 | 12    | 11,7  | 33 | 0,0039 | 0,0045 | 0,0054 | 0,00028 | 0,00059 |
| 1361 | 1065 | 286 | 425961 4519439 | -3515 | -18,6 | 6,4   | 20 | 0,004  | 0,0044 | 0,004  | 0,00028 | 0,00162 |
| 1023 | 1789 | 205 | 425792 4519724 | -2727 | -0,4  | 7,9   | 32 | 0,0039 | 0,0048 | 0,0051 | 0,00023 | 0,0007  |
| 1573 | 1017 | 331 | 425954 4519118 | -3793 | -6,8  | -19,2 | 40 | 0,0041 | 0,0043 | 0,0042 | 0,0003  | 0,00151 |
| 1224 | 1527 | 152 | 426362 4519053 | -2208 | -6,1  | 0     | 37 | 0,0047 | 0,0036 | 0,0055 | 0,00022 | 0,0005  |
| 1428 | 806  | 385 | 425750 4519056 | -2761 | 10,9  | 1,8   | 34 | 0,0042 | 0,004  | 0,0071 | 0,00049 | 0,00047 |
| 1500 | 1000 | 300 | 426100 4520000 | -3000 | 5     | 5     | 12 | 0,0039 | 0,0051 | 0,0053 | 9E-05   | 0,00052 |
| 885  | 1858 | 367 | 425705 4519038 | -3730 | 18,7  | 9,7   | 13 | 0,0039 | 0,0046 | 0,0048 | 0,00025 | 0,0012  |
| 1666 | 1456 | 176 | 426476 4520000 | -2801 | 13    | -19,3 | 24 | 0,0044 | 0,0049 | 0,0053 | 0,00012 | 0,00029 |
| 1155 | 1677 | 449 | 425848 4519232 | -4249 | 9,2   | -10,1 | 12 | 0,0035 | 0,0048 | 0,0045 | 0,00024 | 0,00129 |
| 1959 | 1047 | 150 | 425658 4519296 | -2402 | -0,8  | 13,2  | 26 | 0,0042 | 0,0043 | 0,0059 | 0,00031 | 0,00056 |
| 1502 | 1090 | 340 | 425710 4519087 | -3085 | -11,9 | -6,1  | 21 | 0,004  | 0,0042 | 0,0067 | 0,00035 | 0,00041 |
| 802  | 1755 | 474 | 426475 4519164 | -4134 | -10   | -13   | 35 | 0,0041 | 0,004  | 0,0038 | 0,0004  | 0,0017  |
| 1577 | 1485 | 243 | 426303 4519359 | -3065 | 10    | 14,4  | 23 | 0,0037 | 0,0048 | 0,006  | 0,00012 | 0,00025 |
| 896  | 1716 | 407 | 425738 4519173 | -3418 | -8,5  | 13,7  | 32 | 0,0038 | 0,0046 | 0,0058 | 0,00025 | 0,00054 |
| 1526 | 1013 | 294 | 425929 4519905 | -3666 | -8,5  | 10,7  | 12 | 0,0036 | 0,0046 | 0,0041 | 0,0003  | 0,00165 |
| 1413 | 908  | 374 | 426050 4519804 | -3021 | -3,8  | -2    | 36 | 0,0039 | 0,0049 | 0,0055 | 0,0001  | 0,00039 |
| 1812 | 1753 | 162 | 425834 4519066 | -3482 | 14    | -4,4  | 35 | 0,0039 | 0,0044 | 0,0048 | 0,00024 | 0,00137 |
| 973  | 1451 | 263 | 426217 4519560 | -2590 | 18,6  | -4,8  | 38 | 0,0041 | 0,004  | 0,0056 | 0,00027 | 0,00035 |
| 1104 | 1167 | 351 | 425654 4519055 | -3134 | 8,9   | -18,3 | 28 | 0,0041 | 0,0043 | 0,0055 | 0,00026 | 0,00096 |
| 1107 | 1770 | 400 | 425939 4519664 | -4229 | 1,1   | -12,2 | 28 | 0,0034 | 0,0049 | 0,0041 | 0,00025 | 0,00149 |

|      |      |     |                |       |       |       |    |        |        |        |         |         |
|------|------|-----|----------------|-------|-------|-------|----|--------|--------|--------|---------|---------|
| 1459 | 1010 | 464 | 425683 4519715 | -3954 | -16,1 | 9,3   | 32 | 0,0033 | 0,0051 | 0,0046 | 0,00018 | 0,00102 |
| 863  | 1474 | 462 | 425711 4519198 | -3786 | 7,4   | 2,4   | 30 | 0,0037 | 0,0046 | 0,0047 | 0,00024 | 0,00125 |
| 1382 | 832  | 239 | 426487 4519722 | -2817 | -16,7 | -5,4  | 11 | 0,0044 | 0,0037 | 0,0039 | 0,00035 | 0,00135 |
| 1067 | 1380 | 430 | 425941 4519400 | -3427 | 9,8   | 8,3   | 18 | 0,0037 | 0,0049 | 0,0057 | 0,00015 | 0,0004  |
| 1464 | 1221 | 296 | 426059 4519341 | -2983 | -19,6 | 5,4   | 33 | 0,0038 | 0,0044 | 0,0061 | 0,00018 | 0,00032 |
| 1492 | 1076 | 438 | 426049 4519714 | -4213 | -12,9 | 13,6  | 29 | 0,0036 | 0,0045 | 0,0039 | 0,00034 | 0,00166 |
| 891  | 891  | 384 | 425964 4519313 | -2798 | -12,2 | -11,1 | 27 | 0,0043 | 0,0042 | 0,0046 | 0,00014 | 0,00097 |
| 1339 | 948  | 400 | 426212 4519680 | -3047 | -0,5  | -6,1  | 11 | 0,0039 | 0,0048 | 0,0056 | 9E-05   | 0,00026 |
| 815  | 1024 | 361 | 426172 4519957 | -2532 | -10,5 | 2,7   | 28 | 0,0042 | 0,0041 | 0,0051 | 0,00019 | 0,0004  |
| 1769 | 974  | 239 | 425579 4519683 | -3192 | -19,3 | -16,7 | 28 | 0,0037 | 0,0047 | 0,0046 | 0,0002  | 0,0011  |
| 1505 | 874  | 461 | 425791 4519053 | -3249 | 0,8   | -12,6 | 26 | 0,0039 | 0,0042 | 0,0066 | 0,00031 | 0,0004  |
| 1177 | 1932 | 411 | 426483 4519389 | -4086 | 10,8  | 15,9  | 31 | 0,0035 | 0,0054 | 0,0048 | 8E-05   | 0,00026 |
| 1949 | 1088 | 239 | 425964 4519629 | -2997 | -4,5  | -16   | 21 | 0,0037 | 0,0048 | 0,0056 | 0,0001  | 0,00036 |
| 1291 | 1941 | 398 | 426024 4519209 | -4332 | 16,2  | -12,4 | 32 | 0,0033 | 0,0048 | 0,0046 | 0,0002  | 0,00109 |
| 1086 | 1943 | 247 | 425993 4519633 | -3830 | -0,9  | -13,6 | 38 | 0,0036 | 0,0045 | 0,004  | 0,00027 | 0,00163 |
| 1758 | 1450 | 313 | 426448 4519121 | -4240 | 0,4   | -14   | 12 | 0,0038 | 0,0042 | 0,004  | 0,00038 | 0,00148 |
| 1316 | 1017 | 238 | 425816 4519625 | -2765 | 5,7   | -3,5  | 30 | 0,0039 | 0,0044 | 0,0048 | 0,00019 | 0,00099 |
| 1609 | 1884 | 191 | 425787 4519550 | -3669 | 8,3   | 4,3   | 30 | 0,0034 | 0,0049 | 0,0045 | 0,0002  | 0,00114 |
| 1677 | 1773 | 176 | 426084 4519411 | -2978 | 19    | -0,1  | 21 | 0,0037 | 0,0045 | 0,006  | 0,0002  | 0,00038 |
| 1500 | 1000 | 300 | 425577 4519300 | -3000 | -20   | 5     | 19 | 0,0038 | 0,0043 | 0,0058 | 0,00025 | 0,00059 |
| 1574 | 1856 | 285 | 426080 4519196 | -3872 | -16,3 | 15,6  | 10 | 0,0034 | 0,0051 | 0,0053 | 7E-05   | 0,00025 |

|      |      |     |                |       |       |       |    |        |        |        |         |         |
|------|------|-----|----------------|-------|-------|-------|----|--------|--------|--------|---------|---------|
| 927  | 1133 | 274 | 426149 4519562 | -2428 | -14,1 | 16,8  | 20 | 0,0042 | 0,0038 | 0,0051 | 0,00019 | 0,00034 |
| 1552 | 943  | 481 | 425734 4519660 | -3941 | -14,2 | 4,9   | 35 | 0,0033 | 0,005  | 0,0047 | 0,00015 | 0,00083 |
| 1837 | 813  | 410 | 425819 4519586 | -3604 | 5,5   | 2,9   | 34 | 0,0034 | 0,0049 | 0,0052 | 0,00014 | 0,00069 |
| 1310 | 1051 | 347 | 425750 4519123 | -2891 | -3,4  | -5,7  | 32 | 0,004  | 0,0039 | 0,0066 | 0,00036 | 0,0004  |
| 1500 | 1000 | 300 | 425620 4519300 | -3000 | -7    | 5     | 35 | 0,0038 | 0,0043 | 0,0057 | 0,00024 | 0,00066 |
| 1172 | 1527 | 226 | 425854 4519600 | -2759 | -8,2  | -13,3 | 14 | 0,0038 | 0,0043 | 0,0056 | 0,00022 | 0,00044 |
| 1256 | 1265 | 499 | 425729 4519210 | -4118 | -17,6 | -1,5  | 17 | 0,0035 | 0,0045 | 0,0047 | 0,00021 | 0,00103 |
| 871  | 1248 | 448 | 425923 4519327 | -3638 | 18    | -15   | 32 | 0,0037 | 0,0042 | 0,0043 | 0,00021 | 0,00136 |
| 1505 | 1369 | 187 | 425802 4519279 | -2929 | 17,7  | 12,2  | 28 | 0,0039 | 0,0042 | 0,0051 | 0,00021 | 0,00098 |
| 1591 | 869  | 273 | 426187 4519270 | -3202 | 11,8  | -6,1  | 16 | 0,0041 | 0,0039 | 0,0042 | 0,00021 | 0,00129 |
| 1058 | 1745 | 509 | 426142 4519017 | -4325 | 14,6  | 6,5   | 30 | 0,0035 | 0,0044 | 0,0044 | 0,00023 | 0,00123 |
| 835  | 1051 | 532 | 426263 4519006 | -3566 | -12,6 | 15,8  | 21 | 0,0042 | 0,0038 | 0,0042 | 0,00022 | 0,00128 |
| 1591 | 1517 | 195 | 426365 4519339 | -3646 | 8,5   | 19,8  | 16 | 0,0039 | 0,0038 | 0,0039 | 0,00032 | 0,0015  |
| 1239 | 1628 | 394 | 426309 4519930 | -4207 | -8,8  | 19,8  | 22 | 0,0034 | 0,0048 | 0,0041 | 0,00024 | 0,00109 |
| 1515 | 1500 | 398 | 425897 4519252 | -4295 | -18,6 | -1,4  | 13 | 0,0034 | 0,0045 | 0,0044 | 0,00023 | 0,00113 |
| 1774 | 875  | 300 | 426317 4519141 | -3585 | -13,6 | 7,3   | 14 | 0,0041 | 0,0036 | 0,0041 | 0,00033 | 0,00131 |
| 1600 | 1208 | 210 | 425791 4519487 | -3162 | -1,4  | -19,8 | 26 | 0,0037 | 0,0043 | 0,0045 | 0,00019 | 0,00115 |
| 1500 | 1192 | 300 | 426100 4519300 | -3000 | -7    | 5     | 32 | 0,0036 | 0,0042 | 0,0061 | 0,00015 | 0,00023 |
| 1415 | 813  | 325 | 426235 4519601 | -2599 | -4,1  | -1,4  | 37 | 0,0039 | 0,0038 | 0,0057 | 0,00015 | 0,00027 |
| 1369 | 1548 | 188 | 425807 4519134 | -2695 | 15,1  | 11,1  | 36 | 0,004  | 0,0039 | 0,0061 | 0,00033 | 0,00048 |
| 1352 | 1826 | 307 | 426252 4519857 | -4013 | -15,9 | -0,2  | 25 | 0,0035 | 0,0051 | 0,0044 | 0,00012 | 0,00059 |

|      |      |     |                |       |       |       |    |        |        |        |         |         |
|------|------|-----|----------------|-------|-------|-------|----|--------|--------|--------|---------|---------|
| 824  | 1918 | 251 | 426321 4519928 | -3400 | -16,2 | -19,9 | 22 | 0,0038 | 0,0039 | 0,004  | 0,00027 | 0,00151 |
| 1523 | 1858 | 207 | 425947 4519623 | -3784 | 13,9  | 5,2   | 24 | 0,0033 | 0,0046 | 0,0043 | 0,00019 | 0,00119 |
| 1650 | 1076 | 264 | 426415 4519194 | -2771 | -14,1 | 3,1   | 28 | 0,0039 | 0,0038 | 0,0059 | 0,00013 | 0,00028 |
| 1119 | 1853 | 327 | 426434 4519248 | -3494 | 11    | -9,1  | 16 | 0,0036 | 0,0048 | 0,0054 | 7E-05   | 0,00011 |
| 1116 | 1000 | 300 | 426292 4519300 | -3000 | -3,2  | 5     | 22 | 0,0043 | 0,0036 | 0,0041 | 0,00017 | 0,00111 |
| 1927 | 889  | 260 | 426463 4519221 | -3487 | 7,7   | 6,1   | 40 | 0,0041 | 0,0036 | 0,0041 | 0,00032 | 0,0013  |
| 894  | 1822 | 329 | 426146 4519412 | -3063 | 2     | -12,1 | 32 | 0,0037 | 0,0044 | 0,0057 | 0,00013 | 0,00021 |
| 1908 | 1099 | 426 | 426435 4519534 | -4172 | -1,4  | 6,2   | 38 | 0,0034 | 0,0048 | 0,0046 | 0,00018 | 0,00049 |
| 1138 | 1089 | 248 | 425979 4519835 | -2750 | 0,4   | 10,3  | 25 | 0,0038 | 0,0041 | 0,0046 | 0,00014 | 0,00089 |
| 1518 | 1047 | 522 | 426202 4519293 | -4268 | 4,5   | 15    | 17 | 0,0035 | 0,0042 | 0,0043 | 0,00026 | 0,00126 |
| 1465 | 1014 | 160 | 426277 4519808 | -2316 | 5,4   | 6,5   | 15 | 0,0042 | 0,0036 | 0,0048 | 0,00013 | 0,00049 |
| 972  | 1241 | 403 | 425802 4519575 | -3549 | -13,1 | -2,1  | 34 | 0,0035 | 0,0044 | 0,0045 | 0,00017 | 0,00112 |
| 1400 | 1302 | 289 | 426382 4519708 | -3874 | -15,7 | 18    | 31 | 0,0038 | 0,0038 | 0,0039 | 0,00037 | 0,00143 |
| 1506 | 1642 | 390 | 426071 4519004 | -4185 | 5     | 6,5   | 19 | 0,0033 | 0,0045 | 0,0051 | 0,00015 | 0,00061 |
| 1081 | 1984 | 191 | 426418 4519610 | -2634 | -5,9  | -19,3 | 39 | 0,0041 | 0,0039 | 0,0053 | 0,00015 | 0,00016 |
| 1044 | 1883 | 521 | 426123 4519322 | -4332 | -12,7 | 6,2   | 32 | 0,0031 | 0,0047 | 0,0045 | 0,00014 | 0,00078 |
| 1572 | 1147 | 247 | 425941 4519982 | -3237 | -6,3  | 2,9   | 14 | 0,0035 | 0,0046 | 0,0047 | 0,0001  | 0,00084 |
| 1269 | 1392 | 261 | 425941 4519531 | -2918 | -5,4  | -16,5 | 24 | 0,0036 | 0,0042 | 0,0056 | 0,00016 | 0,00032 |
| 1485 | 1965 | 173 | 426168 4519546 | -3683 | 3,5   | 18,7  | 14 | 0,0035 | 0,0041 | 0,004  | 0,00025 | 0,0014  |
| 1463 | 1773 | 304 | 426017 4519361 | -3975 | 8,8   | 16,5  | 14 | 0,0032 | 0,0047 | 0,0049 | 0,00011 | 0,00056 |
| 958  | 1362 | 387 | 425749 4519399 | -3310 | 1     | -1,9  | 26 | 0,0035 | 0,0043 | 0,0052 | 0,00016 | 0,0007  |

|      |      |     |                |       |       |       |    |        |        |        |         |         |
|------|------|-----|----------------|-------|-------|-------|----|--------|--------|--------|---------|---------|
| 1279 | 984  | 477 | 426023 4519374 | -3948 | -17   | -18,1 | 35 | 0,0036 | 0,004  | 0,0042 | 0,00023 | 0,00124 |
| 1670 | 1375 | 319 | 425968 4519725 | -3961 | -14,6 | -12,4 | 39 | 0,0032 | 0,0049 | 0,0046 | 0,0001  | 0,0006  |
| 1182 | 1570 | 346 | 425970 4519518 | -3965 | 8     | 9,4   | 16 | 0,0033 | 0,0044 | 0,0043 | 0,00019 | 0,00113 |
| 1701 | 1446 | 217 | 425987 4519862 | -3576 | 2,4   | 0,8   | 26 | 0,0033 | 0,0047 | 0,0045 | 0,00013 | 0,00091 |
| 1306 | 1421 | 278 | 426065 4519624 | -3758 | 0,4   | -6,7  | 14 | 0,0035 | 0,0041 | 0,0041 | 0,00023 | 0,00128 |
| 849  | 1711 | 432 | 426348 4519158 | -3310 | 14,3  | 18,6  | 15 | 0,0035 | 0,0043 | 0,0057 | 9E-05   | 0,00011 |
| 1584 | 1378 | 251 | 426375 4519565 | -3889 | -11,1 | 17,9  | 12 | 0,0037 | 0,0037 | 0,0039 | 0,00035 | 0,00132 |
| 1380 | 1128 | 306 | 426368 4519577 | -2922 | 3,3   | 16,8  | 26 | 0,0038 | 0,0041 | 0,0055 | 8E-05   | 0,00014 |
| 1690 | 908  | 459 | 425899 4519437 | -3888 | 1,2   | 5,8   | 14 | 0,0032 | 0,0045 | 0,005  | 0,00013 | 0,00064 |
| 1082 | 1764 | 347 | 425850 4519190 | -3621 | 1,7   | -8,5  | 10 | 0,0034 | 0,0043 | 0,0054 | 0,00013 | 0,00048 |
| 1056 | 1593 | 351 | 426165 4519879 | -3666 | 4     | 5,7   | 29 | 0,0034 | 0,0048 | 0,0045 | 6E-05   | 0,00057 |
| 916  | 1235 | 542 | 426080 4519829 | -3973 | -5,5  | -2    | 35 | 0,0033 | 0,0044 | 0,0041 | 0,00019 | 0,00118 |
| 1743 | 1262 | 252 | 426396 4519939 | -3862 | -1,3  | -5,7  | 14 | 0,0036 | 0,0041 | 0,004  | 0,00032 | 0,00117 |
| 1351 | 1540 | 274 | 426474 4519516 | -3280 | 7,9   | -3,3  | 16 | 0,0037 | 0,0045 | 0,0051 | 5E-05   | 9E-05   |
| 1985 | 869  | 236 | 426148 4519110 | -3196 | -14,3 | -1,4  | 11 | 0,0041 | 0,0035 | 0,0044 | 0,00021 | 0,00098 |
| 1500 | 1000 | 300 | 426100 4519823 | -3000 | -20   | 5     | 16 | 0,0037 | 0,0043 | 0,0052 | 6E-05   | 0,00025 |
| 1890 | 1653 | 211 | 426212 4519585 | -4019 | 2,1   | 13,6  | 15 | 0,0033 | 0,0042 | 0,0041 | 0,00026 | 0,00116 |
| 1392 | 1631 | 459 | 426351 4519100 | -4309 | 17,6  | 2,6   | 18 | 0,0031 | 0,0045 | 0,0048 | 0,00013 | 0,00063 |
| 1500 | 1000 | 300 | 426100 4519300 | -3480 | -7    | 5     | 27 | 0,0038 | 0,0037 | 0,0042 | 0,00021 | 0,00115 |
| 1500 | 1000 | 348 | 426100 4519300 | -3000 | -7    | 5     | 14 | 0,0035 | 0,0039 | 0,0061 | 0,00012 | 0,00018 |
| 1024 | 1390 | 489 | 426386 4519208 | -4099 | -7    | 16,7  | 15 | 0,0036 | 0,0037 | 0,004  | 0,00028 | 0,0012  |

|      |      |     |                |       |       |       |    |        |        |        |         |         |         |
|------|------|-----|----------------|-------|-------|-------|----|--------|--------|--------|---------|---------|---------|
| 1014 | 1502 | 474 | 426388 4519631 | -3853 | 18    | -10,5 | 30 | 0,0035 | 0,0048 | 0,0047 | 5E-05   | 0,00027 |         |
| 1382 | 1056 | 521 | 426110 4519014 | -4071 | 16,7  | 1,4   | 33 | 0,0035 | 0,004  | 0,0047 | 0,00018 |         | 0,00096 |
| 1420 | 1666 | 181 | 426154 4519819 | -2872 | 6,3   | -13   | 29 | 0,0037 | 0,0043 | 0,0051 | 7E-05   | 0,00035 |         |
| 1418 | 1817 | 294 | 426286 4519636 | -4139 | 4,4   | -11,1 | 27 | 0,0032 | 0,0044 | 0,0041 | 0,00021 |         | 0,00103 |
| 1839 | 1031 | 350 | 426217 4519174 | -3465 | 1,2   | -13,9 | 28 | 0,0033 | 0,0043 | 0,0057 | 6E-05   | 0,00014 |         |
| 1580 | 1285 | 266 | 426234 4519978 | -3569 | 8,6   | 15,5  | 11 | 0,0034 | 0,0046 | 0,0045 | 0,0001  | 0,00067 |         |
| 900  | 1348 | 271 | 425986 4519418 | -2650 | -11,3 | 2,9   | 37 | 0,0039 | 0,0036 | 0,0051 | 0,00013 |         | 0,00038 |
| 1132 | 1191 | 230 | 426224 4519577 | -2847 | -10,4 | -11,7 | 13 | 0,004  | 0,0035 | 0,0042 | 0,00013 |         | 0,00089 |
| 1354 | 1729 | 214 | 426489 4519157 | -3616 | -12,9 | -3,2  | 32 | 0,0039 | 0,0033 | 0,004  | 0,0003  | 0,0011  |         |
| 1175 | 1110 | 393 | 426433 4519550 | -3782 | 6,8   | -13,4 | 16 | 0,0037 | 0,0035 | 0,004  | 0,00028 |         | 0,00119 |
| 1923 | 1420 | 197 | 426027 4519432 | -3211 | 11,5  | -14,6 | 33 | 0,0034 | 0,0042 | 0,0054 | 8E-05   | 0,00039 |         |
| 1447 | 1664 | 258 | 425866 4519259 | -3828 | -19,9 | 1,1   | 35 | 0,0033 | 0,004  | 0,0045 | 0,00016 |         | 0,0009  |
| 1500 | 1000 | 300 | 426100 4519780 | -3000 | -7    | 5     | 39 | 0,0035 | 0,0041 | 0,0052 | 5E-05   | 0,00028 |         |
| 1660 | 890  | 360 | 426212 4519676 | -3797 | -9,1  | -0,5  | 38 | 0,0035 | 0,0038 | 0,0041 | 0,00026 |         | 0,00111 |
| 1017 | 1860 | 227 | 425842 4519201 | -3036 | -5,6  | -7,1  | 14 | 0,0036 | 0,0037 | 0,005  | 0,00012 |         | 0,0007  |
| 1500 | 808  | 300 | 426100 4519300 | -3000 | -7    | 5     | 16 | 0,0039 | 0,0034 | 0,0045 | 0,00012 |         | 0,00083 |
| 1500 | 1154 | 300 | 426292 4519300 | -3000 | -3,2  | 5     | 37 | 0,0035 | 0,0038 | 0,0058 | 6E-05   | 0,0001  |         |
| 1904 | 1010 | 436 | 426299 4519081 | -3994 | 9,1   | 3,7   | 22 | 0,0032 | 0,0042 | 0,0053 | 0,0001  | 0,00035 |         |
| 1262 | 1062 | 360 | 426272 4519268 | -3586 | 18,1  | -15   | 24 | 0,0037 | 0,0035 | 0,0042 | 0,00018 |         | 0,00106 |
| 1451 | 1324 | 300 | 426483 4519519 | -3372 | 7,4   | -2,9  | 29 | 0,0035 | 0,0042 | 0,005  | 5E-05   | 9E-05   |         |
| 1056 | 1087 | 368 | 426161 4519170 | -2748 | 1,7   | -4,4  | 17 | 0,0037 | 0,0032 | 0,006  | 0,00017 |         | 0,00019 |



|      |      |     |                |       |       |       |    |        |        |        |         |         |
|------|------|-----|----------------|-------|-------|-------|----|--------|--------|--------|---------|---------|
| 1241 | 1252 | 374 | 426180 4519891 | -3747 | -13,1 | -17,8 | 27 | 0,0033 | 0,0043 | 0,0044 | 0,00011 | 0,00066 |
| 1486 | 1296 | 221 | 426105 4519899 | -3054 | -0,1  | -2,1  | 16 | 0,0035 | 0,0041 | 0,0048 | 6E-05   | 0,00054 |
| 1103 | 1605 | 206 | 426094 4519022 | -2643 | 19    | -4,8  | 28 | 0,004  | 0,0032 | 0,0056 | 0,00016 | 0,00028 |
| 1341 | 1292 | 368 | 426147 4519705 | -3759 | -14,7 | 3     | 17 | 0,0032 | 0,0044 | 0,0046 | 6E-05   | 0,00042 |
| 1654 | 947  | 302 | 426359 4519982 | -3278 | -12,7 | -3    | 30 | 0,0037 | 0,0041 | 0,0047 | 0,00012 | 0,00041 |
| 825  | 1773 | 416 | 425866 4519183 | -3641 | -4,7  | -14,9 | 36 | 0,0033 | 0,0039 | 0,005  | 0,00011 | 0,00063 |
| 1409 | 894  | 465 | 426388 4519915 | -3765 | 18    | 3,4   | 24 | 0,0034 | 0,0042 | 0,0044 | 0,00013 | 0,00063 |
| 1114 | 1354 | 277 | 425925 4519461 | -2913 | 7     | -13,9 | 40 | 0,0035 | 0,0037 | 0,0053 | 0,00012 | 0,00041 |
| 1688 | 1011 | 261 | 426069 4519939 | -3273 | -13,3 | 8     | 18 | 0,0034 | 0,0041 | 0,0046 | 0,0001  | 0,0007  |
| 1228 | 1020 | 296 | 426057 4519343 | -3030 | -19,6 | 5,4   | 11 | 0,0038 | 0,0034 | 0,0045 | 9E-05   | 0,00072 |
| 1202 | 1387 | 266 | 426422 4519960 | -3411 | 2,2   | -15,4 | 34 | 0,0036 | 0,0037 | 0,0042 | 0,00019 | 0,00087 |
| 1500 | 1000 | 300 | 426292 4519300 | -2808 | -7    | 5     | 22 | 0,0036 | 0,0034 | 0,0057 | 8E-05   | 0,00011 |
| 1456 | 906  | 291 | 426052 4519247 | -3057 | -19,1 | 8,5   | 31 | 0,0039 | 0,0033 | 0,0045 | 0,0001  | 0,0007  |
| 1244 | 1353 | 229 | 426085 4519227 | -2984 | 16,9  | 19,6  | 37 | 0,0038 | 0,0033 | 0,0048 | 9E-05   | 0,00067 |
| 1482 | 1111 | 298 | 426079 4519321 | -2992 | -19,8 | 7,8   | 15 | 0,0035 | 0,0036 | 0,0057 | 8E-05   | 0,00011 |
| 855  | 1040 | 444 | 426037 4519204 | -3022 | 18,8  | 4     | 29 | 0,0038 | 0,0034 | 0,0049 | 9E-05   | 0,00057 |
| 1692 | 1000 | 300 | 426100 4519300 | -3000 | -7    | 5     | 19 | 0,0034 | 0,0036 | 0,0059 | 7E-05   | 0,00011 |
| 1500 | 1000 | 338 | 426292 4519300 | -3000 | -3,2  | 5     | 20 | 0,0034 | 0,0036 | 0,0057 | 5E-05   | 7E-05   |
| 878  | 1992 | 225 | 426052 4519461 | -2797 | 12,2  | 8,3   | 22 | 0,0036 | 0,0036 | 0,005  | 0,0001  | 0,00032 |
| 1386 | 871  | 240 | 426498 4519672 | -2585 | -6,6  | 18,7  | 12 | 0,0041 | 0,0027 | 0,0045 | 0,00014 | 0,00041 |
| 1497 | 1155 | 312 | 425977 4519066 | -3544 | -11,6 | 12    | 40 | 0,0035 | 0,0035 | 0,0048 | 0,00012 | 0,0007  |

|      |      |     |                |       |       |       |    |        |        |        |         |         |         |
|------|------|-----|----------------|-------|-------|-------|----|--------|--------|--------|---------|---------|---------|
| 1619 | 1790 | 248 | 426408 4519268 | -3764 | 16,3  | -2,4  | 32 | 0,0032 | 0,0042 | 0,0049 | 5E-05   | 0,00023 |         |
| 1500 | 1000 | 300 | 425839 4519300 | -3000 | -20   | 7,6   | 27 | 0,0035 | 0,0035 | 0,0055 | 0,00011 |         | 0,00025 |
| 1500 | 1000 | 252 | 426100 4519300 | -3000 | -7    | 5     | 18 | 0,0038 | 0,0032 | 0,0046 | 9E-05   | 0,00069 |         |
| 959  | 1170 | 327 | 426408 4519850 | -2788 | 6,7   | -6    | 28 | 0,0038 | 0,0033 | 0,0049 | 9E-05   | 0,00021 |         |
| 1288 | 1140 | 442 | 426100 4519516 | -3938 | -13,4 | -6,8  | 14 | 0,0032 | 0,0038 | 0,0044 | 0,00015 |         | 0,00079 |
| 1974 | 1106 | 273 | 426222 4519632 | -3642 | 6,1   | 4,2   | 37 | 0,0031 | 0,0041 | 0,0047 | 9E-05   | 0,00049 |         |
| 1500 | 1000 | 248 | 426100 4519300 | -3000 | -20   | 5     | 15 | 0,0038 | 0,0032 | 0,0045 | 9E-05   | 0,00063 |         |
| 947  | 1684 | 536 | 426417 4519092 | -4115 | 7,1   | -17,2 | 18 | 0,0032 | 0,0038 | 0,0046 | 0,00014 |         | 0,0005  |
| 1411 | 1048 | 289 | 425993 4519407 | -3258 | -18,9 | 6,1   | 28 | 0,0035 | 0,0035 | 0,0045 | 0,0001  | 0,00076 |         |
| 961  | 1651 | 514 | 426335 4519055 | -4086 | 10,3  | -19,7 | 27 | 0,0032 | 0,0037 | 0,0046 | 0,00013 |         | 0,00059 |
| 1039 | 948  | 467 | 426465 4519882 | -3470 | 9,1   | -7,6  | 15 | 0,0036 | 0,0035 | 0,0043 | 0,00018 |         | 0,00073 |
| 1500 | 1000 | 300 | 426292 4519300 | -3384 | -3,2  | 5     | 37 | 0,0036 | 0,0031 | 0,0043 | 0,00017 |         | 0,00082 |
| 1500 | 1000 | 300 | 425908 4519300 | -3000 | -3,2  | 5     | 12 | 0,0034 | 0,0034 | 0,0055 | 0,0001  | 0,00032 |         |
| 1298 | 1364 | 203 | 426221 4519558 | -2655 | -15,5 | 11,6  | 27 | 0,0037 | 0,003  | 0,005  | 7E-05   | 0,00012 |         |
| 953  | 1907 | 358 | 426272 4519396 | -3661 | 10,1  | -8,9  | 33 | 0,0032 | 0,004  | 0,0048 | 3E-05   | 0,00024 |         |
| 1500 | 877  | 288 | 426292 4519300 | -3000 | -4,4  | 5     | 13 | 0,0039 | 0,0028 | 0,0044 | 0,0001  | 0,00061 |         |
| 1063 | 1585 | 400 | 426097 4519392 | -3791 | -18,1 | -14,2 | 27 | 0,0031 | 0,0039 | 0,0048 | 5E-05   | 0,00036 |         |
| 1577 | 840  | 260 | 426424 4519642 | -2899 | -10,1 | 17,4  | 11 | 0,0039 | 0,0027 | 0,0044 | 0,00016 |         | 0,00063 |
| 1473 | 898  | 294 | 426037 4519363 | -3044 | -19,4 | 8,2   | 40 | 0,0036 | 0,0032 | 0,0046 | 7E-05   | 0,00057 |         |
| 1478 | 937  | 457 | 426068 4519385 | -3835 | -13,7 | 11,4  | 34 | 0,0031 | 0,0037 | 0,0046 | 0,00011 |         | 0,0006  |
| 811  | 1431 | 437 | 426402 4519640 | -3631 | 2     | -12,7 | 15 | 0,0034 | 0,0033 | 0,0042 | 0,00017 |         | 0,00079 |

|      |      |     |                |       |       |       |    |        |        |        |         |         |
|------|------|-----|----------------|-------|-------|-------|----|--------|--------|--------|---------|---------|
| 1500 | 1000 | 300 | 426292 4519684 | -3000 | -3,2  | 5     | 30 | 0,0035 | 0,0036 | 0,0051 | 3E-05   | 0,00013 |
| 1045 | 1589 | 354 | 426428 4519392 | -3443 | 14,5  | -17,9 | 17 | 0,0033 | 0,0038 | 0,005  | 4E-05   | 0,0001  |
| 1500 | 1000 | 300 | 426292 4519300 | -2846 | -3,2  | 5     | 28 | 0,0035 | 0,0031 | 0,0056 | 5E-05   | 6E-05   |
| 1500 | 1000 | 300 | 426100 4519561 | -3000 | -20   | 7,6   | 22 | 0,0034 | 0,0034 | 0,0052 | 4E-05   | 0,00012 |
| 1654 | 1000 | 300 | 426292 4519300 | -3000 | -3,2  | 5     | 36 | 0,0034 | 0,0033 | 0,0056 | 3E-05   | 4E-05   |
| 1500 | 846  | 300 | 426292 4519300 | -3000 | -3,2  | 5     | 19 | 0,0038 | 0,0028 | 0,0045 | 9E-05   | 0,00056 |
| 1469 | 1106 | 295 | 426201 4519346 | -3003 | -19,5 | 8,1   | 16 | 0,0034 | 0,0033 | 0,0054 | 4E-05   | 5E-05   |
| 1167 | 1998 | 278 | 426213 4519294 | -3812 | 5,6   | 6,8   | 28 | 0,0031 | 0,0037 | 0,0044 | 0,0001  | 0,00058 |
| 1269 | 1257 | 305 | 425968 4519357 | -3209 | -4,5  | 9,7   | 24 | 0,0033 | 0,0034 | 0,0051 | 7E-05   | 0,00037 |
| 1308 | 1000 | 300 | 426100 4519300 | -3000 | -7    | 5     | 27 | 0,0036 | 0,003  | 0,0047 | 6E-05   | 0,00049 |
| 1263 | 1914 | 229 | 426041 4519053 | -3448 | -0,2  | 2,8   | 17 | 0,0033 | 0,0034 | 0,0049 | 8E-05   | 0,00054 |
| 1974 | 909  | 194 | 426465 4519227 | -2618 | -6,6  | -6,9  | 37 | 0,004  | 0,0025 | 0,0048 | 8E-05   | 0,0002  |
| 1386 | 1499 | 209 | 426080 4519405 | -3128 | 11,6  | 18,2  | 20 | 0,0034 | 0,0033 | 0,0047 | 7E-05   | 0,00058 |
| 1415 | 1648 | 291 | 426212 4519312 | -3807 | -12,9 | -7,9  | 14 | 0,0031 | 0,0038 | 0,0047 | 8E-05   | 0,00035 |
| 1361 | 1519 | 242 | 426426 4519579 | -3533 | -12,3 | 20    | 25 | 0,0034 | 0,0032 | 0,0042 | 0,00018 | 0,00067 |
| 1537 | 1612 | 162 | 426175 4519110 | -2644 | -2,9  | 18,2  | 26 | 0,0037 | 0,0028 | 0,0057 | 9E-05   | 9E-05   |
| 1065 | 1681 | 260 | 426030 4519274 | -3033 | -7,7  | 11,5  | 27 | 0,0034 | 0,0033 | 0,0052 | 7E-05   | 0,00023 |
| 1963 | 840  | 288 | 426124 4519460 | -3288 | 6,2   | -4,5  | 36 | 0,0033 | 0,0033 | 0,0047 | 0,0001  | 0,00054 |
| 1499 | 987  | 300 | 426091 4519555 | -3003 | -20   | 7,6   | 37 | 0,0033 | 0,0033 | 0,0052 | 3E-05   | 0,00014 |
| 953  | 1700 | 204 | 426370 4519544 | -2639 | -2,9  | -13,5 | 32 | 0,0038 | 0,0026 | 0,0046 | 6E-05   | 0,00025 |
| 1019 | 942  | 507 | 426141 4519215 | -3417 | -9,1  | 13,7  | 21 | 0,0034 | 0,0031 | 0,0046 | 8E-05   | 0,00058 |

|      |      |     |                |       |       |       |    |        |        |        |         |         |
|------|------|-----|----------------|-------|-------|-------|----|--------|--------|--------|---------|---------|
| 1204 | 1467 | 234 | 426314 4519271 | -2780 | 12,9  | 0,5   | 35 | 0,0035 | 0,0028 | 0,0054 | 7E-05   | 7E-05   |
| 1500 | 1000 | 319 | 426100 4519300 | -3000 | -7    | 5     | 19 | 0,0033 | 0,0032 | 0,0056 | 5E-05   | 9E-05   |
| 1500 | 1000 | 300 | 426100 4519300 | -3000 | 17    | 5     | 13 | 0,0034 | 0,0031 | 0,0055 | 8E-05   | 0,00022 |
| 1511 | 842  | 332 | 426274 4519117 | -3070 | -17,2 | 2,3   | 25 | 0,0038 | 0,0027 | 0,0047 | 8E-05   | 0,00038 |
| 1260 | 1022 | 411 | 426087 4519434 | -3371 | 6,3   | 18    | 30 | 0,0031 | 0,0035 | 0,0051 | 4E-05   | 0,00031 |
| 1500 | 1000 | 262 | 426292 4519300 | -3000 | -3,2  | 5     | 34 | 0,0037 | 0,0027 | 0,0046 | 8E-05   | 0,00047 |
| 1430 | 977  | 286 | 426500 4519436 | -3064 | -18,6 | 9     | 12 | 0,0038 | 0,0025 | 0,0043 | 0,00016 | 0,00044 |
| 1500 | 1123 | 288 | 426292 4519300 | -3000 | -4,4  | 5     | 16 | 0,0033 | 0,0031 | 0,0054 | 3E-05   | 3E-05   |
| 1233 | 1820 | 160 | 426387 4519727 | -2811 | 6,2   | -18,6 | 33 | 0,0036 | 0,0029 | 0,0045 | 7E-05   | 0,00049 |
| 1579 | 945  | 253 | 426219 4519646 | -2885 | 5,1   | -9,7  | 39 | 0,0034 | 0,003  | 0,0048 | 5E-05   | 0,00035 |
| 1434 | 1031 | 288 | 426163 4519094 | -3049 | -18,8 | 8,8   | 30 | 0,0037 | 0,0027 | 0,0049 | 5E-05   | 0,00034 |
| 1726 | 1213 | 242 | 426112 4519288 | -3313 | 9,4   | 3,4   | 12 | 0,0032 | 0,0032 | 0,005  | 7E-05   | 0,00043 |
| 1785 | 803  | 358 | 426396 4519126 | -3423 | 13,2  | -7,7  | 39 | 0,0034 | 0,0029 | 0,0047 | 0,00011 | 0,00048 |
| 1378 | 1718 | 160 | 426416 4519753 | -2871 | -4,2  | -7    | 38 | 0,0036 | 0,0029 | 0,0044 | 8E-05   | 0,00042 |
| 1040 | 1238 | 359 | 426345 4519707 | -3306 | -16,1 | 17,6  | 34 | 0,0034 | 0,0033 | 0,0045 | 8E-05   | 0,00039 |
| 1500 | 1000 | 300 | 426100 4519300 | -3000 | 5     | -20   | 33 | 0,0033 | 0,003  | 0,0053 | 5E-05   | 0,00019 |
| 1533 | 994  | 290 | 426261 4519254 | -2907 | -19   | 8,7   | 22 | 0,0035 | 0,0028 | 0,0053 | 4E-05   | 5E-05   |
| 1364 | 1010 | 298 | 426078 4519322 | -3015 | -19,8 | 7,8   | 21 | 0,0035 | 0,0029 | 0,0049 | 4E-05   | 0,0003  |
| 1377 | 1000 | 288 | 426292 4519300 | -3000 | -4,4  | 5     | 38 | 0,0036 | 0,0026 | 0,0046 | 6E-05   | 0,00042 |
| 1500 | 1061 | 300 | 426292 4519300 | -3000 | -3,2  | 5     | 14 | 0,0033 | 0,003  | 0,0054 | 3E-05   | 3E-05   |
| 1456 | 1024 | 295 | 426046 4519354 | -3129 | -19,5 | 8,2   | 29 | 0,0034 | 0,003  | 0,0049 | 4E-05   | 0,00034 |

|      |      |     |                |       |       |      |    |        |        |        |       |         |
|------|------|-----|----------------|-------|-------|------|----|--------|--------|--------|-------|---------|
| 1500 | 1000 | 274 | 426100 4519300 | -3000 | -20   | 7,6  | 16 | 0,0035 | 0,0028 | 0,0048 | 4E-05 | 0,00027 |
| 1500 | 1000 | 300 | 426484 4519300 | -3000 | -7    | 5    | 22 | 0,0035 | 0,0027 | 0,0049 | 6E-05 | 9E-05   |
| 1097 | 1313 | 318 | 426298 4519257 | -2958 | -9,3  | 12,4 | 30 | 0,0034 | 0,0028 | 0,0052 | 4E-05 | 4E-05   |
| 1500 | 1000 | 300 | 426100 4519300 | -3000 | 5     | 5    | 20 | 0,0033 | 0,003  | 0,0054 | 5E-05 | 0,00019 |
| 1500 | 1000 | 300 | 426100 4519300 | -3000 | 5     | 5    | 38 | 0,0033 | 0,003  | 0,0054 | 5E-05 | 0,00019 |
| 1500 | 1000 | 300 | 426100 4519300 | -3000 | 5     | 5    | 25 | 0,0033 | 0,003  | 0,0054 | 5E-05 | 0,00019 |
| 1727 | 1438 | 178 | 426468 4519347 | -2879 | 17,9  | -4   | 24 | 0,0034 | 0,0029 | 0,0053 | 2E-05 | 4E-05   |
| 1420 | 1041 | 308 | 426378 4519313 | -2964 | 4,8   | -13  | 29 | 0,0034 | 0,0029 | 0,0052 | 3E-05 | 3E-05   |
| 860  | 1396 | 435 | 426125 4519023 | -3302 | 0,2   | 8,4  | 11 | 0,0034 | 0,0029 | 0,0052 | 6E-05 | 0,00029 |
| 1893 | 1561 | 165 | 426247 4519454 | -3169 | -17   | -0,6 | 18 | 0,0033 | 0,0032 | 0,0047 | 6E-05 | 0,00021 |
| 1541 | 1067 | 290 | 426235 4519324 | -3056 | -18,7 | 8,9  | 34 | 0,0033 | 0,003  | 0,0052 | 3E-05 | 4E-05   |
| 1483 | 1022 | 315 | 426207 4519315 | -3054 | -18,3 | 9,4  | 30 | 0,0033 | 0,003  | 0,0053 | 2E-05 | 4E-05   |
| 1500 | 1000 | 300 | 426100 4519300 | -3000 | -20   | 7,6  | 24 | 0,0034 | 0,0029 | 0,0053 | 3E-05 | 9E-05   |
| 1500 | 1000 | 300 | 426100 4519300 | -3000 | -19   | 5    | 15 | 0,0034 | 0,0029 | 0,0052 | 3E-05 | 9E-05   |
| 1500 | 1000 | 300 | 426292 4519492 | -3000 | -7    | 5    | 28 | 0,0033 | 0,003  | 0,0051 | 2E-05 | 7E-05   |
| 1500 | 1000 | 300 | 426100 4519300 | -3000 | -20   | 5    | 34 | 0,0034 | 0,0029 | 0,0053 | 3E-05 | 9E-05   |
| 1500 | 1000 | 281 | 426100 4519300 | -3000 | -7    | 5    | 34 | 0,0034 | 0,0028 | 0,005  | 4E-05 | 0,0003  |
| 910  | 1397 | 370 | 426442 4519557 | -3219 | -11,4 | 19,6 | 35 | 0,0034 | 0,0031 | 0,0046 | 6E-05 | 0,00019 |
| 1500 | 1000 | 300 | 426100 4519300 | -3000 | -7    | 9,8  | 31 | 0,0033 | 0,0029 | 0,0053 | 4E-05 | 0,00015 |
| 1500 | 1000 | 315 | 426292 4519300 | -3000 | -3,2  | 5    | 16 | 0,0033 | 0,0029 | 0,0053 | 2E-05 | 4E-05   |
| 1500 | 1000 | 300 | 426100 4519300 | -3000 | -2,2  | 5    | 26 | 0,0033 | 0,0029 | 0,0053 | 4E-05 | 0,00017 |

|      |      |     |                |       |       |       |    |        |        |        |       |         |
|------|------|-----|----------------|-------|-------|-------|----|--------|--------|--------|-------|---------|
| 1500 | 1000 | 300 | 426100 4519300 | -3000 | -7    | -7    | 33 | 0,0033 | 0,0029 | 0,0053 | 4E-05 | 0,00014 |
| 1499 | 1049 | 294 | 426279 4519385 | -3029 | -18,9 | 8,7   | 39 | 0,0034 | 0,0029 | 0,0051 | 3E-05 | 4E-05   |
| 1500 | 1000 | 300 | 426100 4519300 | -3000 | -17,4 | 7,6   | 18 | 0,0033 | 0,0029 | 0,0052 | 3E-05 | 0,0001  |
| 1500 | 1000 | 288 | 426292 4519300 | -2877 | -4,4  | 5     | 33 | 0,0034 | 0,0027 | 0,0053 | 3E-05 | 5E-05   |
| 1500 | 1000 | 300 | 426100 4519300 | -3000 | -11,8 | 5     | 20 | 0,0033 | 0,0029 | 0,0053 | 3E-05 | 0,00013 |
| 1500 | 1000 | 300 | 426100 4519300 | -3000 | -14,8 | 5     | 19 | 0,0033 | 0,0029 | 0,0053 | 3E-05 | 0,00011 |
| 1500 | 1000 | 288 | 426292 4519300 | -2877 | -3,2  | 5     | 40 | 0,0034 | 0,0027 | 0,0053 | 3E-05 | 5E-05   |
| 1500 | 1000 | 300 | 426100 4519300 | -3000 | -7    | 17    | 26 | 0,0033 | 0,0029 | 0,0053 | 4E-05 | 0,00015 |
| 1500 | 1000 | 300 | 426100 4519300 | -3000 | -7    | 0,2   | 34 | 0,0033 | 0,0029 | 0,0053 | 3E-05 | 0,00015 |
| 1346 | 1000 | 300 | 426292 4519300 | -3000 | -3,2  | 5     | 40 | 0,0036 | 0,0025 | 0,0047 | 5E-05 | 0,00034 |
| 1175 | 1039 | 418 | 426471 4519119 | -3379 | 14,2  | 11,5  | 27 | 0,0035 | 0,0027 | 0,0047 | 8E-05 | 0,00034 |
| 1500 | 1000 | 300 | 426100 4519300 | -3000 | -7    | 5     | 31 | 0,0033 | 0,0029 | 0,0053 | 3E-05 | 0,00015 |
| 1500 | 1000 | 300 | 426100 4519300 | -3000 | -20   | 10,2  | 11 | 0,0033 | 0,0029 | 0,0053 | 3E-05 | 0,0001  |
| 1466 | 1056 | 294 | 426164 4519321 | -3017 | -19,4 | 8,2   | 21 | 0,0033 | 0,0028 | 0,0052 | 3E-05 | 7E-05   |
| 1389 | 1012 | 295 | 426363 4519398 | -3096 | -18,3 | 9,2   | 37 | 0,0036 | 0,0025 | 0,0045 | 9E-05 | 0,00036 |
| 1008 | 1985 | 310 | 426366 4519024 | -3593 | 19,5  | -1,7  | 16 | 0,0032 | 0,0031 | 0,0048 | 6E-05 | 0,00029 |
| 1500 | 1000 | 288 | 426292 4519300 | -3123 | -3,2  | 5     | 23 | 0,0035 | 0,0026 | 0,0047 | 7E-05 | 0,00039 |
| 1500 | 1000 | 300 | 426138 4519300 | -3000 | -3,2  | 5     | 24 | 0,0033 | 0,0028 | 0,0053 | 3E-05 | 0,00014 |
| 1312 | 1776 | 223 | 426175 4519355 | -3323 | -9,5  | -14,5 | 15 | 0,0031 | 0,0032 | 0,0048 | 3E-05 | 0,0003  |
| 1500 | 1000 | 288 | 426292 4519300 | -3123 | -4,4  | 5     | 10 | 0,0035 | 0,0026 | 0,0046 | 7E-05 | 0,00039 |
| 1561 | 1000 | 300 | 426292 4519300 | -3000 | -3,2  | 5     | 19 | 0,0033 | 0,0029 | 0,0053 | 2E-05 | 4E-05   |

|      |      |     |                |       |       |     |    |        |        |        |       |         |
|------|------|-----|----------------|-------|-------|-----|----|--------|--------|--------|-------|---------|
| 1500 | 1000 | 300 | 426292 4519454 | -3000 | -3,2  | 5   | 36 | 0,0033 | 0,0029 | 0,0051 | 2E-05 | 8E-05   |
| 1488 | 1003 | 329 | 426236 4519034 | -3142 | 4,9   | 4,9 | 25 | 0,0034 | 0,0027 | 0,0053 | 5E-05 | 0,0002  |
| 1623 | 1000 | 288 | 426292 4519300 | -3000 | -4,4  | 5   | 13 | 0,0033 | 0,0028 | 0,0052 | 2E-05 | 5E-05   |
| 1500 | 1000 | 300 | 426446 4519300 | -3000 | -3,2  | 5   | 19 | 0,0035 | 0,0026 | 0,005  | 4E-05 | 8E-05   |
| 1450 | 1020 | 291 | 426145 4519209 | -3037 | -19,1 | 8,5 | 38 | 0,0035 | 0,0027 | 0,005  | 3E-05 | 0,00023 |
| 1475 | 1016 | 293 | 426100 4519329 | -3074 | -19,3 | 8,3 | 36 | 0,0033 | 0,0028 | 0,005  | 3E-05 | 0,00021 |
| 1504 | 978  | 289 | 426258 4519306 | -3100 | -18,3 | 9,3 | 31 | 0,0035 | 0,0026 | 0,0046 | 6E-05 | 0,00033 |
| 1500 | 1000 | 275 | 426292 4519300 | -3000 | -4,4  | 5   | 10 | 0,0035 | 0,0025 | 0,0048 | 5E-05 | 0,00028 |
| 1500 | 1000 | 300 | 426292 4519300 | -3192 | -7    | 5   | 24 | 0,0034 | 0,0027 | 0,0046 | 7E-05 | 0,00038 |
| 1500 | 1000 | 288 | 426292 4519177 | -3000 | -4,4  | 5   | 29 | 0,0035 | 0,0025 | 0,005  | 4E-05 | 0,00021 |
| 1591 | 1011 | 288 | 426192 4519299 | -3042 | -18,8 | 8,8 | 22 | 0,0033 | 0,0028 | 0,0052 | 2E-05 | 7E-05   |
| 1448 | 983  | 290 | 426327 4519400 | -3047 | -19   | 8,6 | 38 | 0,0035 | 0,0025 | 0,0046 | 7E-05 | 0,00028 |
| 1500 | 951  | 288 | 426292 4519300 | -3000 | -4,4  | 5   | 19 | 0,0035 | 0,0025 | 0,0047 | 5E-05 | 0,0003  |
| 1500 | 1000 | 288 | 426292 4519177 | -3000 | -3,2  | 5   | 32 | 0,0035 | 0,0025 | 0,005  | 4E-05 | 0,00021 |
| 1597 | 1011 | 290 | 426235 4519324 | -3056 | -18,7 | 8,9 | 30 | 0,0033 | 0,0028 | 0,0051 | 3E-05 | 6E-05   |
| 1500 | 1000 | 306 | 426292 4519300 | -3000 | -3,2  | 5   | 37 | 0,0033 | 0,0028 | 0,0052 | 2E-05 | 6E-05   |
| 1523 | 1004 | 289 | 426401 4519351 | -3064 | -18   | 9,6 | 11 | 0,0035 | 0,0026 | 0,0047 | 7E-05 | 0,00015 |
| 1555 | 1047 | 293 | 426205 4519279 | -3093 | -18,1 | 9,5 | 30 | 0,0033 | 0,0028 | 0,0052 | 2E-05 | 7E-05   |
| 1500 | 1000 | 275 | 426292 4519300 | -3000 | -3,2  | 5   | 22 | 0,0035 | 0,0025 | 0,0048 | 5E-05 | 0,00029 |
| 1500 | 1000 | 300 | 426292 4519108 | -3000 | -7    | 5   | 33 | 0,0035 | 0,0025 | 0,0052 | 4E-05 | 0,00014 |
| 1500 | 1000 | 288 | 426169 4519300 | -3000 | -4,4  | 5   | 25 | 0,0034 | 0,0027 | 0,005  | 3E-05 | 0,00021 |

|      |      |     |                |       |       |      |    |        |        |        |       |         |
|------|------|-----|----------------|-------|-------|------|----|--------|--------|--------|-------|---------|
| 1541 | 1011 | 290 | 426235 4519324 | -3000 | -18,7 | 8,9  | 25 | 0,0033 | 0,0027 | 0,0051 | 2E-05 | 6E-05   |
| 1500 | 1000 | 300 | 426292 4519146 | -3000 | -3,2  | 5    | 11 | 0,0035 | 0,0025 | 0,0052 | 3E-05 | 0,00013 |
| 1130 | 1019 | 489 | 426317 4519163 | -3453 | -17,3 | -0,6 | 18 | 0,0032 | 0,0029 | 0,005  | 4E-05 | 0,00016 |
| 1451 | 1000 | 288 | 426292 4519300 | -3000 | -4,4  | 5    | 27 | 0,0035 | 0,0025 | 0,0048 | 4E-05 | 0,00025 |
| 1500 | 1000 | 288 | 426169 4519300 | -3000 | -3,2  | 5    | 23 | 0,0034 | 0,0027 | 0,0051 | 3E-05 | 0,00021 |
| 1487 | 1016 | 305 | 426180 4519311 | -3041 | -18,7 | 8,9  | 30 | 0,0033 | 0,0028 | 0,0052 | 2E-05 | 8E-05   |
| 1523 | 1031 | 288 | 426261 4519305 | -3037 | -18,9 | 8,8  | 33 | 0,0034 | 0,0027 | 0,005  | 3E-05 | 8E-05   |
| 1531 | 993  | 288 | 426213 4519302 | -3104 | -18,9 | 9,1  | 20 | 0,0034 | 0,0026 | 0,0048 | 4E-05 | 0,00025 |
| 1533 | 1003 | 292 | 426305 4519442 | -3095 | -18,5 | 9,1  | 39 | 0,0034 | 0,0027 | 0,0048 | 4E-05 | 0,00014 |
| 1500 | 1000 | 300 | 426292 4519300 | -3000 | -3,2  | 1,2  | 29 | 0,0034 | 0,0027 | 0,0052 | 2E-05 | 8E-05   |
| 1541 | 1011 | 290 | 426178 4519324 | -3056 | -18,7 | 8,9  | 27 | 0,0033 | 0,0027 | 0,005  | 3E-05 | 0,00012 |
| 1500 | 1000 | 300 | 426292 4519300 | -3000 | -4,4  | 5    | 36 | 0,0034 | 0,0026 | 0,0051 | 2E-05 | 9E-05   |
| 1499 | 1020 | 284 | 426248 4519264 | -3065 | -18   | 9    | 27 | 0,0035 | 0,0025 | 0,0048 | 4E-05 | 0,00023 |
| 1500 | 1000 | 300 | 426292 4519300 | -3000 | -7    | 5    | 39 | 0,0034 | 0,0027 | 0,0051 | 2E-05 | 8E-05   |
| 1500 | 1000 | 300 | 426292 4519300 | -3000 | -7    | 5    | 28 | 0,0034 | 0,0027 | 0,0051 | 2E-05 | 8E-05   |
| 1500 | 1000 | 300 | 426292 4519300 | -3000 | -5,1  | 5    | 17 | 0,0034 | 0,0026 | 0,0051 | 2E-05 | 8E-05   |
| 1574 | 1027 | 288 | 426265 4519305 | -3083 | -18,9 | 8,8  | 26 | 0,0033 | 0,0027 | 0,005  | 3E-05 | 8E-05   |
| 1555 | 955  | 288 | 426221 4519310 | -3042 | -18,8 | 9,1  | 25 | 0,0034 | 0,0026 | 0,0048 | 4E-05 | 0,00021 |
| 1500 | 1000 | 288 | 426415 4519300 | -3000 | -4,4  | 5    | 21 | 0,0035 | 0,0025 | 0,0048 | 5E-05 | 0,00016 |
| 1500 | 1000 | 300 | 426292 4519300 | -3154 | -3,2  | 5    | 33 | 0,0034 | 0,0026 | 0,0047 | 6E-05 | 0,00032 |
| 1545 | 1033 | 289 | 426231 4519312 | -3066 | -18,3 | 9,3  | 32 | 0,0033 | 0,0027 | 0,005  | 3E-05 | 9E-05   |



|      |      |     |                |       |       |      |    |        |        |        |       |         |
|------|------|-----|----------------|-------|-------|------|----|--------|--------|--------|-------|---------|
| 1528 | 1038 | 289 | 426191 4519315 | -3067 | -18,8 | 8,7  | 22 | 0,0033 | 0,0027 | 0,0051 | 2E-05 | 0,0001  |
| 1718 | 1014 | 260 | 426349 4519434 | -3067 | 0,7   | 18,5 | 31 | 0,0033 | 0,0028 | 0,0049 | 4E-05 | 0,00017 |
| 1541 | 1011 | 290 | 426235 4519324 | -3056 | -18,7 | 9,5  | 29 | 0,0034 | 0,0027 | 0,005  | 3E-05 | 0,00011 |
| 1488 | 997  | 288 | 426217 4519306 | -3038 | -18,9 | 9,1  | 34 | 0,0034 | 0,0026 | 0,0048 | 4E-05 | 0,00021 |
| 1517 | 1014 | 286 | 426240 4519289 | -3064 | -18,5 | 9    | 31 | 0,0034 | 0,0026 | 0,0049 | 4E-05 | 0,00017 |
| 1500 | 1000 | 288 | 426292 4519300 | -2951 | -4,4  | 5    | 15 | 0,0034 | 0,0026 | 0,0051 | 2E-05 | 0,0001  |
| 1500 | 1000 | 288 | 426292 4519423 | -3000 | -4,4  | 5    | 25 | 0,0034 | 0,0027 | 0,0049 | 3E-05 | 0,00014 |
| 1500 | 1000 | 300 | 426292 4519300 | -3000 | 0,7   | 5    | 26 | 0,0033 | 0,0027 | 0,0052 | 2E-05 | 9E-05   |
| 1469 | 1038 | 286 | 426290 4519326 | -3097 | -18,1 | 7,4  | 18 | 0,0034 | 0,0025 | 0,0047 | 5E-05 | 0,00024 |
| 1500 | 980  | 288 | 426292 4519300 | -3000 | -4,4  | 5    | 22 | 0,0035 | 0,0025 | 0,0049 | 4E-05 | 0,00022 |
| 1503 | 995  | 290 | 426263 4519326 | -3082 | -18,5 | 9,1  | 26 | 0,0034 | 0,0025 | 0,0047 | 5E-05 | 0,00023 |
| 1500 | 939  | 300 | 426292 4519300 | -3000 | -3,2  | 5    | 25 | 0,0035 | 0,0025 | 0,0049 | 4E-05 | 0,00023 |
| 1522 | 1016 | 287 | 426239 4519296 | -3062 | -18,8 | 8,7  | 20 | 0,0034 | 0,0026 | 0,0049 | 3E-05 | 0,00015 |
| 1529 | 990  | 287 | 426279 4519298 | -3053 | -19   | 9,2  | 24 | 0,0035 | 0,0025 | 0,0048 | 5E-05 | 0,00018 |
| 1500 | 1000 | 300 | 426292 4519300 | -3000 | -4,7  | 5    | 19 | 0,0034 | 0,0026 | 0,0051 | 2E-05 | 9E-05   |
| 1500 | 1000 | 288 | 426312 4519300 | -3000 | -4,4  | 4,8  | 18 | 0,0035 | 0,0025 | 0,0049 | 3E-05 | 0,00017 |
| 1500 | 1000 | 290 | 426351 4519300 | -3000 | -4,4  | 5    | 23 | 0,0035 | 0,0025 | 0,0049 | 4E-05 | 0,00014 |
| 1500 | 1000 | 290 | 426339 4519300 | -3000 | -4,4  | 5    | 25 | 0,0035 | 0,0025 | 0,0049 | 3E-05 | 0,00014 |
| 1469 | 1038 | 286 | 426290 4519326 | -3097 | -16,9 | 10,7 | 22 | 0,0034 | 0,0025 | 0,0047 | 5E-05 | 0,00027 |
| 1480 | 1000 | 288 | 426292 4519300 | -3000 | -4,4  | 5    | 24 | 0,0035 | 0,0025 | 0,0049 | 3E-05 | 0,00019 |
| 1500 | 1000 | 300 | 426292 4519300 | -3000 | -3,2  | 8,8  | 25 | 0,0034 | 0,0026 | 0,0051 | 2E-05 | 9E-05   |

|      |      |     |                |       |       |     |    |        |        |        |       |         |
|------|------|-----|----------------|-------|-------|-----|----|--------|--------|--------|-------|---------|
| 1500 | 980  | 290 | 426331 4519300 | -3000 | -4,4  | 5   | 25 | 0,0035 | 0,0025 | 0,0048 | 4E-05 | 0,0002  |
| 1439 | 1000 | 300 | 426292 4519300 | -3000 | -3,2  | 5   | 24 | 0,0034 | 0,0025 | 0,0049 | 3E-05 | 0,00016 |
| 1533 | 998  | 288 | 426218 4519308 | -3078 | -18,9 | 9,1 | 26 | 0,0034 | 0,0026 | 0,0048 | 4E-05 | 0,00019 |
| 1518 | 1013 | 286 | 426241 4519284 | -3061 | -18,4 | 8,9 | 25 | 0,0034 | 0,0026 | 0,0049 | 4E-05 | 0,00018 |
| 1537 | 1004 | 286 | 426231 4519288 | -3057 | -18,3 | 8,9 | 25 | 0,0034 | 0,0026 | 0,0049 | 3E-05 | 0,00016 |
| 1514 | 1013 | 286 | 426242 4519287 | -3061 | -18,7 | 8,7 | 26 | 0,0034 | 0,0026 | 0,0049 | 4E-05 | 0,00017 |
| 1508 | 1000 | 290 | 426331 4519300 | -2992 | -4,5  | 5   | 21 | 0,0034 | 0,0025 | 0,005  | 3E-05 | 0,00013 |
| 1500 | 1000 | 283 | 426292 4519300 | -3000 | -4,4  | 5   | 23 | 0,0034 | 0,0025 | 0,0049 | 4E-05 | 0,00021 |
| 1500 | 1000 | 292 | 426331 4519300 | -3000 | -4,4  | 5   | 24 | 0,0034 | 0,0025 | 0,005  | 3E-05 | 0,00013 |
| 1500 | 1000 | 300 | 426292 4519300 | -3000 | -3,2  | 3,5 | 23 | 0,0033 | 0,0026 | 0,0051 | 2E-05 | 9E-05   |
| 1500 | 1000 | 290 | 426331 4519300 | -3000 | -4,4  | 4,8 | 25 | 0,0034 | 0,0025 | 0,0049 | 3E-05 | 0,00015 |
| 1500 | 980  | 288 | 426312 4519300 | -3000 | -4,4  | 5   | 27 | 0,0035 | 0,0025 | 0,0049 | 4E-05 | 0,00022 |
| 1500 | 1000 | 288 | 426292 4519251 | -3000 | -4,4  | 5   | 25 | 0,0034 | 0,0025 | 0,005  | 3E-05 | 0,00018 |
| 1517 | 1019 | 286 | 426243 4519285 | -3064 | -18,4 | 8,9 | 21 | 0,0034 | 0,0026 | 0,0049 | 4E-05 | 0,00017 |
| 1500 | 1000 | 300 | 426292 4519300 | -3000 | -3,2  | 6,5 | 18 | 0,0033 | 0,0026 | 0,0051 | 2E-05 | 9E-05   |
| 1500 | 1000 | 288 | 426415 4519300 | -3000 | -3,2  | 5   | 20 | 0,0035 | 0,0024 | 0,0048 | 5E-05 | 0,00016 |
| 1500 | 1000 | 288 | 426312 4519280 | -3000 | -4,4  | 5   | 18 | 0,0034 | 0,0025 | 0,0049 | 3E-05 | 0,00017 |
| 1520 | 1000 | 290 | 426331 4519300 | -3000 | -4,4  | 5   | 23 | 0,0034 | 0,0025 | 0,005  | 3E-05 | 0,00012 |
| 1500 | 1000 | 290 | 426331 4519300 | -2992 | -4,5  | 5   | 27 | 0,0034 | 0,0025 | 0,0049 | 3E-05 | 0,00014 |
| 1500 | 1000 | 285 | 426292 4519300 | -3000 | -3,2  | 5   | 23 | 0,0034 | 0,0025 | 0,0049 | 3E-05 | 0,0002  |
| 1541 | 1011 | 290 | 426235 4519324 | -3056 | -19,3 | 8,9 | 29 | 0,0033 | 0,0027 | 0,005  | 3E-05 | 0,0001  |

|      |      |     |                |       |       |       |    |        |        |        |       |         |
|------|------|-----|----------------|-------|-------|-------|----|--------|--------|--------|-------|---------|
| 1500 | 1000 | 288 | 426292 4519300 | -3000 | -4,9  | 5     | 21 | 0,0034 | 0,0025 | 0,0049 | 3E-05 | 0,00017 |
| 1500 | 1000 | 300 | 426292 4519300 | -3000 | -1,6  | 5     | 27 | 0,0033 | 0,0026 | 0,0051 | 2E-05 | 9E-05   |
| 1017 | 1440 | 313 | 426325 4519435 | -3099 | -11,5 | -19,7 | 28 | 0,0033 | 0,0028 | 0,0048 | 3E-05 | 0,00014 |
| 1017 | 1440 | 313 | 426325 4519435 | -3099 | -11,5 | -19,7 | 24 | 0,0033 | 0,0028 | 0,0048 | 3E-05 | 0,00014 |
| 1500 | 1000 | 288 | 426292 4519300 | -3049 | -4,4  | 5     | 24 | 0,0034 | 0,0025 | 0,0048 | 4E-05 | 0,00025 |
| 1518 | 1019 | 286 | 426242 4519286 | -3062 | -18,4 | 8,9   | 18 | 0,0034 | 0,0026 | 0,0049 | 3E-05 | 0,00015 |
| 1514 | 1018 | 286 | 426242 4519281 | -3062 | -18,4 | 8,9   | 25 | 0,0034 | 0,0026 | 0,0049 | 4E-05 | 0,00017 |
| 1529 | 1002 | 288 | 426257 4519302 | -3057 | -18,9 | 9     | 20 | 0,0034 | 0,0026 | 0,0049 | 4E-05 | 0,00016 |
| 1522 | 1011 | 287 | 426236 4519295 | -3065 | -18,6 | 9     | 26 | 0,0034 | 0,0026 | 0,0049 | 4E-05 | 0,00017 |
| 1516 | 1016 | 286 | 426242 4519289 | -3061 | -18,4 | 8,9   | 21 | 0,0034 | 0,0026 | 0,0049 | 4E-05 | 0,00017 |
| 1549 | 1000 | 288 | 426292 4519300 | -3000 | -4,4  | 5     | 25 | 0,0034 | 0,0026 | 0,005  | 3E-05 | 0,00011 |
| 1517 | 1012 | 286 | 426240 4519282 | -3062 | -18,5 | 8,9   | 26 | 0,0034 | 0,0026 | 0,0049 | 4E-05 | 0,00018 |
| 1517 | 1028 | 287 | 426243 4519294 | -3064 | -18,5 | 9     | 27 | 0,0034 | 0,0026 | 0,0049 | 3E-05 | 0,00014 |
| 1518 | 1024 | 286 | 426243 4519287 | -3061 | -18,4 | 8,9   | 23 | 0,0034 | 0,0026 | 0,0049 | 3E-05 | 0,00015 |
| 1500 | 1000 | 288 | 426243 4519300 | -3000 | -4,4  | 5     | 22 | 0,0034 | 0,0026 | 0,005  | 3E-05 | 0,00018 |
| 1500 | 1000 | 288 | 426292 4519300 | -3000 | -1,9  | 5     | 22 | 0,0034 | 0,0025 | 0,0049 | 3E-05 | 0,00018 |
| 1500 | 1000 | 290 | 426331 4519300 | -2980 | -4,4  | 5     | 22 | 0,0034 | 0,0025 | 0,005  | 3E-05 | 0,00012 |
| 1492 | 1000 | 290 | 426331 4519300 | -3000 | -4,4  | 5     | 24 | 0,0034 | 0,0025 | 0,0049 | 3E-05 | 0,00016 |
| 1509 | 1004 | 288 | 426229 4519306 | -3049 | -18,9 | 9     | 25 | 0,0034 | 0,0026 | 0,0049 | 3E-05 | 0,00017 |
| 1515 | 1010 | 287 | 426241 4519291 | -3060 | -19   | 8,5   | 25 | 0,0034 | 0,0026 | 0,0049 | 4E-05 | 0,00018 |
| 1500 | 1000 | 288 | 426292 4519423 | -3000 | -3,2  | 5     | 24 | 0,0033 | 0,0027 | 0,0049 | 3E-05 | 0,00015 |

|      |      |     |                |       |       |     |    |        |        |        |       |         |
|------|------|-----|----------------|-------|-------|-----|----|--------|--------|--------|-------|---------|
| 1521 | 1021 | 287 | 426240 4519291 | -3063 | -18,4 | 9   | 24 | 0,0034 | 0,0026 | 0,0049 | 3E-05 | 0,00015 |
| 1500 | 1000 | 288 | 426292 4519300 | -3000 | -4,4  | 5,5 | 24 | 0,0034 | 0,0025 | 0,0049 | 3E-05 | 0,00017 |
| 1508 | 1000 | 290 | 426331 4519300 | -3000 | -4,4  | 5   | 23 | 0,0034 | 0,0025 | 0,005  | 3E-05 | 0,00014 |
| 1543 | 1033 | 287 | 426243 4519296 | -3073 | -18,6 | 8,8 | 24 | 0,0033 | 0,0026 | 0,005  | 3E-05 | 0,00011 |
| 1515 | 1019 | 286 | 426243 4519286 | -3062 | -18,4 | 8,9 | 23 | 0,0034 | 0,0026 | 0,0049 | 4E-05 | 0,00017 |
| 1512 | 1026 | 286 | 426245 4519290 | -3064 | -18,5 | 9   | 24 | 0,0034 | 0,0026 | 0,0049 | 3E-05 | 0,00015 |
| 1500 | 1000 | 286 | 426292 4519300 | -3000 | -4,4  | 5   | 23 | 0,0034 | 0,0025 | 0,0049 | 3E-05 | 0,00018 |
| 1511 | 1036 | 287 | 426247 4519296 | -3066 | -18,6 | 9   | 23 | 0,0034 | 0,0026 | 0,0049 | 3E-05 | 0,00013 |
| 1527 | 1014 | 288 | 426239 4519276 | -3059 | -18,5 | 8,9 | 24 | 0,0034 | 0,0026 | 0,0049 | 3E-05 | 0,00014 |
| 1500 | 1049 | 288 | 426292 4519300 | -3000 | -4,4  | 5   | 26 | 0,0033 | 0,0027 | 0,0051 | 2E-05 | 8E-05   |
| 1500 | 1000 | 288 | 426292 4519300 | -3000 | -4,4  | 4,5 | 18 | 0,0034 | 0,0025 | 0,0049 | 3E-05 | 0,00018 |
| 1479 | 1026 | 290 | 426227 4519317 | -3064 | -17,9 | 9,7 | 18 | 0,0034 | 0,0026 | 0,0049 | 3E-05 | 0,00018 |
| 1500 | 1000 | 290 | 426331 4519300 | -3000 | -4,5  | 5   | 25 | 0,0034 | 0,0025 | 0,0049 | 3E-05 | 0,00015 |
| 1500 | 1000 | 300 | 426292 4519300 | -3000 | -3,2  | 5   | 22 | 0,0033 | 0,0026 | 0,0051 | 2E-05 | 9E-05   |
| 1500 | 1000 | 290 | 426331 4519320 | -3000 | -4,4  | 5   | 22 | 0,0034 | 0,0025 | 0,0049 | 3E-05 | 0,00013 |
| 1500 | 1000 | 290 | 426323 4519300 | -3000 | -4,4  | 5   | 22 | 0,0034 | 0,0025 | 0,0049 | 3E-05 | 0,00015 |
| 1480 | 1025 | 290 | 426226 4519317 | -3064 | -20   | 9,7 | 27 | 0,0034 | 0,0026 | 0,0049 | 3E-05 | 0,00016 |
| 1520 | 1015 | 285 | 426241 4519294 | -3061 | -18,5 | 8,9 | 26 | 0,0034 | 0,0026 | 0,0049 | 4E-05 | 0,00017 |
| 1492 | 1000 | 290 | 426331 4519300 | -2992 | -4,5  | 5   | 24 | 0,0034 | 0,0025 | 0,0049 | 3E-05 | 0,00015 |
| 1518 | 1021 | 286 | 426242 4519288 | -3062 | -18,4 | 8,9 | 22 | 0,0034 | 0,0026 | 0,0049 | 3E-05 | 0,00016 |
| 1500 | 1000 | 294 | 426292 4519300 | -3000 | -3,2  | 5   | 20 | 0,0034 | 0,0026 | 0,005  | 3E-05 | 0,00013 |

|      |      |     |                |       |       |     |    |        |        |        |       |         |
|------|------|-----|----------------|-------|-------|-----|----|--------|--------|--------|-------|---------|
| 1513 | 1017 | 286 | 426244 4519285 | -3061 | -18,5 | 8,8 | 24 | 0,0034 | 0,0025 | 0,0048 | 4E-05 | 0,00018 |
| 1500 | 1000 | 288 | 426292 4519300 | -3000 | -4,4  | 6,2 | 21 | 0,0034 | 0,0025 | 0,0049 | 3E-05 | 0,00017 |
| 1500 | 1000 | 290 | 426331 4519280 | -3000 | -4,4  | 5   | 27 | 0,0034 | 0,0025 | 0,0049 | 3E-05 | 0,00015 |
| 1500 | 1000 | 290 | 426331 4519300 | -2992 | -4,5  | 5,1 | 21 | 0,0034 | 0,0025 | 0,0049 | 3E-05 | 0,00013 |
| 1528 | 1025 | 286 | 426243 4519290 | -3068 | -18,5 | 8,8 | 25 | 0,0034 | 0,0026 | 0,0049 | 3E-05 | 0,00014 |
| 1529 | 1025 | 287 | 426237 4519298 | -3064 | -18,4 | 9,1 | 29 | 0,0034 | 0,0026 | 0,0049 | 3E-05 | 0,00014 |
| 1523 | 1009 | 286 | 426238 4519285 | -3059 | -18,4 | 8,9 | 23 | 0,0034 | 0,0026 | 0,0048 | 4E-05 | 0,0002  |
| 1500 | 1008 | 290 | 426331 4519300 | -2992 | -4,5  | 5   | 20 | 0,0034 | 0,0025 | 0,005  | 3E-05 | 0,00012 |
| 1500 | 1000 | 290 | 426331 4519292 | -2992 | -4,5  | 5   | 28 | 0,0034 | 0,0025 | 0,0049 | 3E-05 | 0,00014 |
| 1516 | 1016 | 286 | 426242 4519282 | -3061 | -18,4 | 8,9 | 25 | 0,0034 | 0,0026 | 0,0049 | 4E-05 | 0,00017 |
| 1500 | 1000 | 288 | 426292 4519300 | -3000 | -4,4  | 3,8 | 22 | 0,0034 | 0,0025 | 0,005  | 3E-05 | 0,00016 |
| 1500 | 1000 | 288 | 426292 4519300 | -3000 | -5,6  | 5   | 25 | 0,0034 | 0,0025 | 0,005  | 3E-05 | 0,00016 |
| 1515 | 1020 | 286 | 426237 4519288 | -3062 | -18,4 | 8,9 | 16 | 0,0034 | 0,0026 | 0,0049 | 3E-05 | 0,00017 |
| 1527 | 1014 | 288 | 426239 4519304 | -3059 | -18,5 | 8,9 | 25 | 0,0034 | 0,0026 | 0,0049 | 3E-05 | 0,00014 |
| 1500 | 992  | 290 | 426331 4519300 | -2992 | -4,5  | 5   | 26 | 0,0034 | 0,0025 | 0,0049 | 3E-05 | 0,00015 |
| 1500 | 1000 | 288 | 426292 4519300 | -3000 | -3,2  | 5   | 20 | 0,0034 | 0,0025 | 0,005  | 3E-05 | 0,00017 |
| 1529 | 1031 | 292 | 426236 4519309 | -3082 | -18,3 | 9,3 | 22 | 0,0033 | 0,0027 | 0,005  | 3E-05 | 0,0001  |
| 1513 | 1017 | 286 | 426243 4519284 | -3062 | -18,5 | 8,9 | 27 | 0,0034 | 0,0025 | 0,0049 | 4E-05 | 0,00018 |
| 1500 | 1000 | 288 | 426312 4519300 | -3020 | -4,4  | 5   | 23 | 0,0034 | 0,0025 | 0,0049 | 4E-05 | 0,0002  |
| 1500 | 1000 | 290 | 426331 4519300 | -3020 | -4,4  | 5   | 26 | 0,0034 | 0,0025 | 0,0049 | 4E-05 | 0,00018 |
| 1500 | 1008 | 290 | 426331 4519300 | -3000 | -4,4  | 5   | 26 | 0,0034 | 0,0025 | 0,0049 | 3E-05 | 0,00013 |

|      |      |     |                |       |       |     |    |        |        |        |       |         |
|------|------|-----|----------------|-------|-------|-----|----|--------|--------|--------|-------|---------|
| 1500 | 1000 | 290 | 426339 4519300 | -2992 | -4,5  | 5   | 22 | 0,0034 | 0,0025 | 0,0049 | 3E-05 | 0,00014 |
| 1541 | 1011 | 290 | 426235 4519268 | -3056 | -18,7 | 8,9 | 20 | 0,0034 | 0,0026 | 0,005  | 3E-05 | 0,00011 |
| 1541 | 1011 | 284 | 426235 4519324 | -3056 | -18,7 | 8,9 | 24 | 0,0034 | 0,0026 | 0,0049 | 3E-05 | 0,00015 |
| 1500 | 1000 | 288 | 426292 4519349 | -3000 | -4,4  | 5   | 26 | 0,0034 | 0,0026 | 0,0049 | 3E-05 | 0,00015 |
| 1516 | 1018 | 287 | 426241 4519279 | -3063 | -18,4 | 8,9 | 24 | 0,0034 | 0,0026 | 0,0049 | 3E-05 | 0,00016 |
| 1509 | 1055 | 288 | 426251 4519309 | -3070 | -18,8 | 9,1 | 23 | 0,0033 | 0,0027 | 0,005  | 3E-05 | 0,0001  |
| 1500 | 1000 | 293 | 426292 4519300 | -3000 | -4,4  | 5   | 27 | 0,0034 | 0,0026 | 0,005  | 3E-05 | 0,00013 |
| 1500 | 1020 | 288 | 426292 4519300 | -3000 | -4,4  | 5   | 21 | 0,0034 | 0,0026 | 0,005  | 3E-05 | 0,00013 |
| 1500 | 1000 | 289 | 426331 4519300 | -2992 | -4,5  | 5   | 21 | 0,0034 | 0,0025 | 0,005  | 3E-05 | 0,00014 |
| 1500 | 1000 | 288 | 426331 4519300 | -3000 | -4,4  | 5   | 21 | 0,0034 | 0,0025 | 0,0049 | 3E-05 | 0,00016 |
| 1500 | 1000 | 288 | 426331 4519300 | -3000 | -4,4  | 5   | 22 | 0,0034 | 0,0025 | 0,0049 | 3E-05 | 0,00016 |
| 1520 | 1021 | 286 | 426243 4519287 | -3065 | -18,4 | 8,9 | 22 | 0,0034 | 0,0026 | 0,0049 | 3E-05 | 0,00016 |
| 1500 | 1000 | 288 | 426341 4519300 | -3000 | -4,4  | 5   | 25 | 0,0034 | 0,0025 | 0,0049 | 4E-05 | 0,00016 |
| 1500 | 1000 | 289 | 426331 4519300 | -3000 | -4,4  | 5   | 21 | 0,0034 | 0,0025 | 0,0049 | 3E-05 | 0,00015 |
| 1517 | 1023 | 287 | 426231 4519292 | -3062 | -18,5 | 8,9 | 22 | 0,0034 | 0,0026 | 0,0049 | 3E-05 | 0,00016 |
| 1531 | 1006 | 288 | 426229 4519307 | -3068 | -18,9 | 9   | 24 | 0,0034 | 0,0026 | 0,0049 | 3E-05 | 0,00016 |
| 1520 | 1015 | 287 | 426241 4519294 | -3061 | -18,5 | 8,9 | 26 | 0,0034 | 0,0026 | 0,0049 | 3E-05 | 0,00016 |
| 1500 | 1000 | 288 | 426312 4519300 | -3000 | -4,2  | 5   | 19 | 0,0034 | 0,0025 | 0,0049 | 3E-05 | 0,00017 |
| 1520 | 1000 | 288 | 426292 4519300 | -3000 | -4,4  | 5   | 20 | 0,0034 | 0,0025 | 0,005  | 3E-05 | 0,00014 |
| 1500 | 1000 | 288 | 426312 4519300 | -3000 | -4,4  | 5,2 | 35 | 0,0034 | 0,0025 | 0,0049 | 3E-05 | 0,00017 |
| 1500 | 1000 | 290 | 426331 4519300 | -2984 | -4,5  | 5   | 25 | 0,0034 | 0,0025 | 0,005  | 3E-05 | 0,00013 |

|      |      |     |                |       |       |     |    |        |        |        |       |         |
|------|------|-----|----------------|-------|-------|-----|----|--------|--------|--------|-------|---------|
| 1521 | 1029 | 288 | 426218 4519301 | -3063 | -18,6 | 8,8 | 23 | 0,0033 | 0,0026 | 0,005  | 3E-05 | 0,00013 |
| 1500 | 1020 | 288 | 426312 4519300 | -3000 | -4,4  | 5   | 26 | 0,0034 | 0,0025 | 0,005  | 3E-05 | 0,00012 |
| 1523 | 1030 | 287 | 426243 4519291 | -3060 | -18,4 | 8,9 | 26 | 0,0034 | 0,0026 | 0,0049 | 3E-05 | 0,00013 |
| 1500 | 1000 | 288 | 426312 4519300 | -2980 | -4,4  | 5   | 20 | 0,0034 | 0,0025 | 0,005  | 3E-05 | 0,00013 |
| 1500 | 1000 | 290 | 426331 4519300 | -2992 | -4,5  | 4,9 | 28 | 0,0034 | 0,0025 | 0,005  | 3E-05 | 0,00013 |
| 1527 | 1014 | 285 | 426239 4519304 | -3059 | -18,5 | 8,9 | 25 | 0,0034 | 0,0026 | 0,0049 | 3E-05 | 0,00016 |
| 1500 | 1000 | 292 | 426312 4519300 | -3000 | -4,4  | 5   | 21 | 0,0034 | 0,0025 | 0,005  | 3E-05 | 0,00014 |
| 1500 | 1000 | 290 | 426331 4519300 | -3000 | -4,4  | 5   | 21 | 0,0034 | 0,0025 | 0,005  | 3E-05 | 0,00014 |
| 1514 | 1018 | 286 | 426240 4519286 | -3062 | -18,4 | 8,9 | 26 | 0,0034 | 0,0026 | 0,0049 | 4E-05 | 0,00017 |
| 1520 | 1015 | 287 | 426241 4519280 | -3061 | -18,5 | 8,9 | 27 | 0,0034 | 0,0026 | 0,0049 | 3E-05 | 0,00017 |
| 1500 | 1000 | 290 | 426331 4519300 | -2992 | -4,3  | 5   | 20 | 0,0034 | 0,0025 | 0,0049 | 3E-05 | 0,00014 |
| 1500 | 1020 | 290 | 426331 4519300 | -3000 | -4,4  | 5   | 22 | 0,0034 | 0,0026 | 0,005  | 3E-05 | 0,00011 |
| 1500 | 1000 | 290 | 426331 4519308 | -2992 | -4,5  | 5   | 29 | 0,0034 | 0,0025 | 0,0049 | 3E-05 | 0,00013 |
| 1500 | 1000 | 290 | 426292 4519300 | -3000 | -4,4  | 5   | 22 | 0,0034 | 0,0025 | 0,005  | 3E-05 | 0,00016 |
| 1500 | 1000 | 290 | 426331 4519300 | -3000 | -4,6  | 5   | 20 | 0,0034 | 0,0025 | 0,0049 | 3E-05 | 0,00015 |
| 1500 | 1000 | 290 | 426331 4519300 | -2984 | -4,4  | 5   | 26 | 0,0034 | 0,0025 | 0,005  | 3E-05 | 0,00012 |
| 1500 | 1000 | 290 | 426331 4519300 | -2992 | -4,5  | 5   | 22 | 0,0034 | 0,0025 | 0,005  | 3E-05 | 0,00013 |
| 1541 | 1011 | 290 | 426235 4519324 | -3056 | -18,7 | 8,9 | 25 | 0,0033 | 0,0026 | 0,005  | 3E-05 | 0,00011 |
| 1500 | 1000 | 290 | 426331 4519300 | -3000 | -4,2  | 5   | 29 | 0,0034 | 0,0025 | 0,0049 | 3E-05 | 0,00015 |
| 1500 | 992  | 290 | 426331 4519300 | -3000 | -4,4  | 5   | 24 | 0,0034 | 0,0025 | 0,0049 | 3E-05 | 0,00016 |
| 1500 | 1000 | 288 | 426292 4519300 | -3000 | -3,9  | 5   | 22 | 0,0034 | 0,0025 | 0,0049 | 3E-05 | 0,00017 |

|      |      |     |                |       |       |     |    |        |        |        |       |         |
|------|------|-----|----------------|-------|-------|-----|----|--------|--------|--------|-------|---------|
| 1500 | 1000 | 290 | 426331 4519308 | -3000 | -4,4  | 5   | 25 | 0,0034 | 0,0025 | 0,0049 | 3E-05 | 0,00015 |
| 1520 | 1000 | 288 | 426312 4519300 | -3000 | -4,4  | 5   | 26 | 0,0034 | 0,0025 | 0,005  | 3E-05 | 0,00014 |
| 1500 | 1000 | 288 | 426312 4519320 | -3000 | -4,4  | 5   | 20 | 0,0034 | 0,0025 | 0,0049 | 3E-05 | 0,00016 |
| 1480 | 1000 | 290 | 426331 4519300 | -3000 | -4,4  | 5   | 26 | 0,0034 | 0,0025 | 0,0049 | 3E-05 | 0,00017 |
| 1500 | 1000 | 288 | 426292 4519300 | -3000 | -4,4  | 5   | 28 | 0,0034 | 0,0025 | 0,0049 | 3E-05 | 0,00016 |
| 1500 | 1000 | 290 | 426331 4519292 | -3000 | -4,4  | 5   | 24 | 0,0034 | 0,0025 | 0,0049 | 3E-05 | 0,00015 |
| 1480 | 1000 | 288 | 426312 4519300 | -3000 | -4,4  | 5   | 24 | 0,0034 | 0,0025 | 0,0049 | 3E-05 | 0,00019 |
| 1513 | 1017 | 286 | 426243 4519284 | -3062 | -18,4 | 8,9 | 24 | 0,0034 | 0,0025 | 0,0049 | 4E-05 | 0,00018 |
| 1513 | 1017 | 286 | 426243 4519284 | -3062 | -18,4 | 8,9 | 24 | 0,0034 | 0,0025 | 0,0049 | 4E-05 | 0,00018 |
| 1500 | 1000 | 288 | 426312 4519300 | -3000 | -4,6  | 5   | 24 | 0,0034 | 0,0025 | 0,0049 | 3E-05 | 0,00017 |
| 1500 | 1000 | 288 | 426312 4519300 | -3000 | -4,4  | 5   | 24 | 0,0034 | 0,0025 | 0,0049 | 3E-05 | 0,00016 |
| 1500 | 1000 | 290 | 426323 4519300 | -2992 | -4,5  | 5   | 24 | 0,0034 | 0,0025 | 0,005  | 3E-05 | 0,00014 |
| 1500 | 1000 | 290 | 426331 4519300 | -3000 | -4,4  | 5,2 | 24 | 0,0034 | 0,0025 | 0,0049 | 3E-05 | 0,00015 |
| 1500 | 1000 | 290 | 426312 4519300 | -3000 | -4,4  | 5   | 25 | 0,0034 | 0,0025 | 0,005  | 3E-05 | 0,00015 |
| 1500 | 1000 | 290 | 426331 4519300 | -3000 | -4,4  | 5   | 24 | 0,0034 | 0,0025 | 0,0049 | 3E-05 | 0,00015 |
| 1500 | 1000 | 290 | 426331 4519300 | -2992 | -4,4  | 5   | 24 | 0,0034 | 0,0025 | 0,005  | 3E-05 | 0,00014 |
| 1500 | 1000 | 290 | 426331 4519300 | -2992 | -4,5  | 5   | 24 | 0,0034 | 0,0025 | 0,0049 | 3E-05 | 0,00013 |
